# Supplementary material
Source: PubMed Central journal article supplement (PMC1315315)
Supplement: supp.pdf [file supp.pdf]

SAPS 3 - FROM EVALUATION OF THE PATIENT  
TO EVALUATION OF THE INTENSIVE CARE UNIT.

ELECTRONIC SUPPLEMENTARY MATERIAL

saps3.org 

## Table of Contents

|                                                                                        |    |
|----------------------------------------------------------------------------------------|----|
| Introduction.....                                                                      | 3  |
| Appendix A. Additional tables.....                                                     | 4  |
| Table E1. Kappa- and Intraclass-correlation coefficients .....                         | 4  |
| Table E2. ICU specialities. ....                                                       | 5  |
| Table E3. Comorbidities. ....                                                          | 6  |
| Table E4. Reasons for ICU admission. ....                                              | 7  |
| Table E5. Acute medical diseases. ....                                                 | 9  |
| Table E6. Sites of surgery. ....                                                       | 11 |
| Table E7. Performance of the SAPS II in the SAPS 3 Hospital Outcome Cohort. ....       | 12 |
| Table E8. Estimated coefficients for the variables used in the SAPS 3 model. ....      | 13 |
| A. Partitioning by patients.....                                                       | 13 |
| B. Partitioning by ICUs .....                                                          | 16 |
| Table E9. Hosmer-Lemeshow tests for the SAPS 3 in the overall sample. ....             | 19 |
| Table E10. Number of patients and O/E ratios (SAPS 3) by country. ....                 | 20 |
| Table E11. O/E ratios (SAPS 3) for the customized equations by country. ....           | 21 |
| Appendix B. Additional figures. ....                                                   | 22 |
| B.1. Calibration curves and Hosmer-Lemeshow goodness-of-fit tests for the SAPS 3. .... | 22 |
| Australasia (n = 1756): .....                                                          | 22 |
| Central and South America (n = 2130):.....                                             | 23 |
| Central and Western Europe (n = 4192): .....                                           | 24 |
| Eastern Europe (n = 888):.....                                                         | 25 |
| North America (n = 731):.....                                                          | 26 |
| Northern Europe (n = 339): .....                                                       | 27 |
| Southern Europe and Mediterranean countries (n = 6748):.....                           | 28 |
| B.2. Area under the ROC curves for the SAPS 3 for the geographic regions. ....         | 29 |
| Appendix C. Data definitions as used in the SAPS 3 study. ....                         | 37 |
| Appendix D. Scientific Board of the SAPS 3 Project. ....                               | 75 |
| Project coordinator: .....                                                             | 75 |
| Steering Committee:.....                                                               | 75 |
| Advisory Board: .....                                                                  | 75 |
| Appendix E. Country coordinators of the SAPS 3 Project.....                            | 76 |
| Appendix F. List of participating ICUs and their respective coordinators .....         | 78 |

## Introduction

This file contains the Electronic Supplementary Material for both parts of the report “SAPS 3 - From evaluation of the patient to evaluation of the Intensive Care Unit”.

For Appendix C, *Data definitions* we left the text as it was published for the data collection. However, since the original data definitions contained typographic errors and misspellings we applied some corrections (language editing), without changing the content. We are aware that the text might still contain semantic or syntactic errors but wanted to keep the definitions as close to the original as possible.

With respect to the details of the different board members and coordinators (Appendices D-F), please note that they are displayed as registered in our project database.

A software for calculation of the SAPS 3 Admission Score is already available and can be downloaded from [www.saps3.org](http://www.saps3.org).

Rui Moreno & Philipp Metnitz on behalf of all authors

## Appendix A. Additional tables.

For details about variables see Appendix C, Data definitions.

**Table E1.** Kappa- and Intraclass-correlation coefficients

| Coefficient                     | Kappa | Intraclass |
|---------------------------------|-------|------------|
| <b>Admission Data</b>           |       |            |
| Gender                          | 0.97  |            |
| Age                             |       | 0.98       |
| Body height                     |       | 0.98       |
| Body weight                     |       | 0.79       |
| Hospital admission date         |       | 0.97       |
| Time of hospital admission      |       | 0.94       |
| ICU admission date              |       | 0.89       |
| Time of admission to the ICU    |       | 0.94       |
| Origin                          | 0.90  |            |
| Intrahospital origin            | 0.91  |            |
| Readmission to the ICU          | 0.95  |            |
| Planned admission               | 0.92  |            |
| Comorbidities                   | 0.89  |            |
| <b>Physiological data</b>       |       |            |
| Heartrate maximum               |       | 0.98       |
| Heartrate minimum               |       | 0.96       |
| Systolic blood pressure maximum |       | 0.96       |
| Systolic blood pressure minimum |       | 0.80       |
| Body temperature maximum        |       | 0.94       |
| Body temperature minimum        |       | 0.91       |
| Respiratory rate maximum        |       | 0.90       |
| Respiratory rate minimum        |       | 0.93       |
| PaO2 minimum                    |       | 0.97       |
| PaCO2 minimum                   |       | 0.97       |
| FiO2                            |       | 0.95       |
| PEEP                            |       | 0.72       |
| Tidal volume                    |       | 0.97       |
| pH maximum                      |       | 0.98       |
| pH minimum                      |       | 0.98       |
| HCO3 maximum                    |       | 0.95       |
| HCO3 minimum                    |       | 0.95       |
| Base excess maximum             |       | 0.91       |
| Base excess minimum             |       | 0.95       |
| Urea nitrogen                   |       | 0.97       |
| Serume creatinine               |       | 0.88       |
| Serum bilirubine                |       | 0.98       |
| Leukocytes maximum              |       | 0.57       |
| Leukocytes minimum              |       | 0.94       |

## Electronic Supplementary Material

|                        |      |      |
|------------------------|------|------|
| Platelets minimum      |      | 0.87 |
| GCS Actual             |      | 0.91 |
| GCS Actual eye         |      | 0.91 |
| GCS Actual motor       |      | 0.91 |
| GCS Actual verbal      |      | 0.88 |
| GCS Estimated          |      | 0.92 |
| GCS Estimated eye      |      | 0.90 |
| GCS Estimated motor    |      | 0.93 |
| GCS Estimated verbal   |      | 0.85 |
| CPR                    | 0.96 |      |
| Vasoactive medication  | 0.87 |      |
| Mechanical ventilation | 0.82 |      |
| Ventilatory support    | 0.88 |      |

Maximum and minimum refer to the highest and lowest values during the observation interval, respectively. All physiologic values are taken from the day of ICU admission (observation interval: within one hour before and after ICU admission). Kappa and Intraclass refer to Kapp- and Intraclass-correlation coefficients, respectively.

**Table E2.** ICU specialities (Basic SAPS 3 cohort).

| <i>Specialty</i>       | N   | %    |
|------------------------|-----|------|
| Mixed medical-surgical | 214 | 69.7 |
| Surgical. non cardiac  | 21  | 6.8  |
| Medical                | 18  | 5.9  |
| Mixed medical coronary | 17  | 5.5  |
| Other                  | 8   | 2.6  |
| Neurosurgical          | 6   | 2.0  |
| Neurological           | 3   | 1.0  |
| Surgical. cardiac      | 2   | 0.7  |
| Coronary care          | 1   | 0.3  |
| Transplant             | 1   | 0.3  |
| Trauma                 | 1   | 0.3  |
| missing                | 15  | 4.9  |

**Table E3. Comorbidities.**

|                           | N            | %      | N            | %      |
|---------------------------|--------------|--------|--------------|--------|
| <i>Number of patients</i> | <b>19577</b> | 100.00 | <b>16784</b> | 100.00 |
| Alcoholism                | 1310         | 6.69   | 1139         | 6.79   |
| Arterial hypertension     | 7139         | 36.47  | 6023         | 35.89  |
| Chemotherapy              | 464          | 2.37   | 410          | 2.44   |
| Chronic heart failure     |              |        |              |        |
| Class II NYHA             | 939          | 4.80   | 853          | 5.08   |
| Class III NYHA            | 606          | 3.10   | 547          | 3.26   |
| Class IV NYHA             | 240          | 1.23   | 203          | 1.21   |
| Chronic pulmonary failure | 840          | 4.29   | 726          | 4.33   |
| Cirrhosis                 | 601          | 3.07   | 523          | 3.12   |
| COPD                      | 2347         | 11.99  | 2086         | 12.43  |
| EV drug addict            | 209          | 1.07   | 189          | 1.13   |
| Haematological cancer     | 317          | 1.62   | 279          | 1.66   |
| HIV / AIDS                |              |        |              |        |
| HIV positive, no AIDS     | 63           | 0.32   | 51           | 0.30   |
| AIDS                      | 91           | 0.46   | 81           | 0.48   |
| Immunosuppression, other  | 341          | 1.74   | 293          | 1.75   |
| Diabetes                  |              |        |              |        |
| Insuline-dependent        | 581          | 2.97   | 513          | 3.06   |
| Non-insuline-dependent    | 1185         | 6.05   | 992          | 5.91   |
| Cancer                    |              |        |              |        |
| Metastatic cancer         | 553          | 2.82   | 499          | 2.97   |
| Non-metastatic cancer     | 1113         | 5.69   | 988          | 5.89   |
| Radiotherapy              | 286          | 1.46   | 252          | 1.50   |
| Steroid treatment         | 744          | 3.80   | 649          | 3.87   |
| Chronical renal failure   | 1131         | 5.78   | 989          | 5.89   |

Tables E3 – E6:

N=19,577 depicts the SAPS 3 BASIC Cohort, N= 16784 the SAPS 3 Hospital Outcome Cohort.

**Table E4.** Reasons for ICU admission.

|                                                                                | N            | %      | N            | %      |
|--------------------------------------------------------------------------------|--------------|--------|--------------|--------|
| <i>Number of patients</i>                                                      | <b>19577</b> | 100.00 | <b>16784</b> | 100.00 |
| <i>Basic</i>                                                                   |              |        |              |        |
| Basic and observational                                                        | 6265         | 32.00  | 5299         | 31.57  |
| <i>Cardiovascular</i>                                                          |              |        |              |        |
| Cardiac arrest                                                                 | 560          | 2.86   | 528          | 3.15   |
| Hypovolemic non hemorrhagic shock                                              | 202          | 1.03   | 187          | 1.11   |
| Hypovolemic hemorrhagic shock                                                  | 462          | 2.36   | 424          | 2.53   |
| Septic shock                                                                   | 704          | 3.60   | 659          | 3.93   |
| Cardiogenic shock                                                              | 308          | 1.57   | 284          | 1.69   |
| Anaphylatic shock                                                              | 23           | 0.12   | 21           | 0.13   |
| Mixed and undefined shock                                                      | 310          | 1.58   | 288          | 1.72   |
| Chest pain (with ECG changes compatible with either angina or AMI)             | 1200         | 6.13   | 917          | 5.46   |
| Hypertensive crisis                                                            | 163          | 0.83   | 135          | 0.80   |
| Rhythm disturbances                                                            | 662          | 3.38   | 582          | 3.47   |
| Cardiac failure without shock either left, right or global                     | 709          | 3.62   | 618          | 3.68   |
| Shock                                                                          | 59           | 0.30   | 755          | 4.50   |
| Other                                                                          | 923          | 4.71   | 46           | 0.27   |
| <i>Digestive</i>                                                               |              |        |              |        |
| Bleeding                                                                       | 517          | 2.64   | 460          | 2.74   |
| Acute abdomen                                                                  | 579          | 2.96   | 525          | 3.13   |
| Severe pancreatitis                                                            | 160          | 0.82   | 138          | 0.82   |
| Other                                                                          | 356          | 1.82   | 296          | 1.76   |
| <i>Hematological</i>                                                           |              |        |              |        |
| Haemorrhagic syndrome/disseminated intravascular coagulation                   | 224          | 1.14   | 208          | 1.24   |
| Severe hemolysis                                                               | 25           | 0.13   | 18           | 0.11   |
| Other                                                                          | 189          | 0.97   | 166          | 0.99   |
| <i>Hepatic</i>                                                                 |              |        |              |        |
| Liver failure                                                                  | 286          | 1.46   | 257          | 1.53   |
| Other                                                                          | 136          | 0.69   | 114          | 0.68   |
| <i>Metabolic</i>                                                               |              |        |              |        |
| Acid-base and/or electrolyte disturbance                                       | 991          | 5.06   | 919          | 5.48   |
| Hypo and hypertermia                                                           | 87           | 0.44   | 77           | 0.46   |
| Hypo and hyperglycemia (includes diabetic coma)                                | 186          | 0.95   | 167          | 0.99   |
| Other                                                                          | 106          | 0.54   | 90           | 0.54   |
| <i>Neurological</i>                                                            |              |        |              |        |
| Coma, stupor, obtunded, vigilance disturbances, confusion, agitation, delirium | 926          | 4.73   | 855          | 5.09   |
| Seizures                                                                       | 282          | 1.44   | 240          | 1.43   |
| Focal neurological deficit (hemiplegia, paraplegia, tetraplegia)               | 415          | 2.12   | 335          | 2.00   |
| Intracranial mass effect                                                       | 446          | 2.28   | 386          | 2.30   |
| Other                                                                          | 429          | 2.19   | 354          | 2.11   |
| <i>Renal</i>                                                                   |              |        |              |        |
| Pre-renal ARF                                                                  | 549          | 2.80   | 509          | 3.03   |
| Obstructive ARF                                                                | 57           | 0.29   | 49           | 0.29   |
| Organic ARF                                                                    | 337          | 1.72   | 305          | 1.82   |
| Other                                                                          | 214          | 1.09   | 177          | 1.05   |
| <i>Respiratory</i>                                                             |              |        |              |        |
| ALI and ARDS                                                                   | 1109         | 5.66   | 1034         | 6.16   |
| Acute respiratory failure on chronic pulmonary disease                         | 1411         | 7.21   | 1243         | 7.41   |
| Other                                                                          | 1881         | 9.61   | 1646         | 9.81   |

Electronic Supplementary Material

*Other*

|               |     |      |     |      |
|---------------|-----|------|-----|------|
| Severe trauma | 943 | 4.82 | 839 | 5.00 |
| other         | 461 | 2.35 | 363 | 2.16 |



**Table E5.** Acute medical diseases.

|                                        | N     | %      | N     | %      |
|----------------------------------------|-------|--------|-------|--------|
| Number of patients                     | 19577 | 100.00 | 16784 | 100.00 |
| <b>Cardiovascular</b>                  |       |        |       |        |
| Myocardial infarction                  | 1239  | 6.33   | 1034  | 6.16   |
| Cardiopathy                            | 941   | 4.66   | 824   | 4.91   |
| Unstable angina                        | 913   | 4.81   | 718   | 4.28   |
| Rhythm disturbances                    | 858   | 4.38   | 761   | 4.53   |
| Other                                  | 1583  | 8.09   | 1370  | 8.16   |
| <b>Digestive</b>                       |       |        |       |        |
| Neoplasia of the upper digestive tract | 438   | 2.24   | 386   | 2.30   |
| Neoplasia of the lower digestive tract | 432   | 2.21   | 373   | 2.22   |
| Oesophageal, gastric, duodenal ulcer   | 233   | 1.19   | 204   | 1.22   |
| Pancreatitis                           | 197   | 1.01   | 172   | 1.02   |
| Oesophageal, gastric varices           | 120   | 0.61   | 100   | 0.60   |
| Cholecistitis                          | 106   | 0.54   | 94    | 0.56   |
| Acute toxic, drug hepatitis            | 35    | 0.18   | 28    | 0.17   |
| Acute alcoholic hepatitis              | 29    | 0.15   | 24    | 0.14   |
| Other                                  | 1008  | 5.15   | 874   | 5.21   |
| <b>Haematological</b>                  |       |        |       |        |
| Malignant disease                      | 153   | 0.78   | 137   | 0.82   |
| Non malignant disease                  | 41    | 0.21   | 41    | 0.24   |
| Transfusional reaction                 | 32    | 0.16   | 32    | 0.19   |
| Drug toxicity and secondary effects    | 27    | 0.14   | 25    | 0.15   |
| Sickle Cell Anemia                     | 1     | 0.01   | 1     | 0.01   |
| Other                                  | 110   | 0.56   | 92    | 0.55   |
| <b>Metabolic</b>                       |       |        |       |        |
| Other intoxication, acute              | 229   | 1.17   | 211   | 1.26   |
| Drug overdose                          | 224   | 1.14   | 202   | 1.20   |
| Diabetic ketoacidosis                  | 113   | 0.58   | 102   | 0.61   |
| Endocrinopathy                         | 89    | 0.45   | 76    | 0.45   |
| Adverse effects of medication          | 38    | 0.19   | 35    | 0.21   |
| Hyperosmolar diabetic coma             | 27    | 0.14   | 26    | 0.15   |
| Other                                  | 238   | 1.22   | 200   | 1.19   |
| <b>Neurological</b>                    |       |        |       |        |
| Cerebrovascular accident               | 1231  | 6.29   | 1047  | 6.24   |
| Intracranial tumor                     | 531   | 2.71   | 451   | 2.69   |
| Post-anoxic coma                       | 134   | 0.68   | 127   | 0.76   |
| Idiopathic epilepsy                    | 113   | 0.58   | 96    | 0.57   |
| Degenerative disease                   | 90    | 0.46   | 75    | 0.45   |
| Myopathia, myasthenia gravis           | 66    | 0.34   | 63    | 0.38   |
| Delirium tremens                       | 44    | 0.22   | 37    | 0.22   |
| Polyneuritis and polyradiculoneuritis  | 40    | 0.20   | 31    | 0.18   |
| Other                                  | 695   | 3.55   | 595   | 3.55   |
| <b>Pregnancy</b>                       |       |        |       |        |
| Eclampsia, preeclampsia                | 36    | 0.18   | 31    | 0.18   |
| Delivery haemorrhage                   | 36    | 0.18   | 31    | 0.18   |
| HELLP syndrome                         | 22    | 0.11   | 18    | 0.11   |
| Other                                  | 47    | 0.24   | 39    | 0.23   |

Electronic Supplementary Material

|                    |                                           |      |      |      |      |
|--------------------|-------------------------------------------|------|------|------|------|
| <i>Renal</i>       |                                           |      |      |      |      |
|                    | Acute tubular necrosis                    | 150  | 0.77 | 137  | 0.82 |
|                    | Gynaecologic diseases, malignant          | 100  | 0.51 | 87   | 0.52 |
|                    | Renal neoplasia                           | 98   | 0.50 | 88   | 0.52 |
|                    | Gynaecologic diseases, non malignant      | 53   | 0.27 | 47   | 0.28 |
|                    | Vascular nephropathy                      | 40   | 0.20 | 39   | 0.23 |
|                    | Acute glomerulopathy                      | 36   | 0.18 | 29   | 0.17 |
|                    | Interstitial nephropathy                  | 34   | 0.17 | 29   | 0.17 |
|                    | Other                                     | 358  | 1.83 | 295  | 1.76 |
| <i>Respiratory</i> |                                           |      |      |      |      |
|                    | Exacerbation of chronic pulmonary disease | 926  | 4.73 | 824  | 4.91 |
|                    | Tumor                                     | 290  | 1.48 | 253  | 1.51 |
|                    | Pulmonary embolism                        | 188  | 0.96 | 169  | 1.01 |
|                    | Pleural effusion                          | 167  | 0.85 | 150  | 0.89 |
|                    | Obstruction                               | 131  | 0.67 | 118  | 0.70 |
|                    | Asthma attack                             | 133  | 0.68 | 120  | 0.71 |
|                    | Inhalation pneumonitis                    | 127  | 0.65 | 114  | 0.68 |
|                    | Other                                     | 1245 | 6.36 | 1105 | 6.58 |
| <i>Trauma</i>      |                                           |      |      |      |      |
|                    | Polytrauma with brain trauma              | 493  | 2.52 | 443  | 2.64 |
|                    | Polytrauma without brain trauma           | 407  | 2.08 | 362  | 2.16 |
|                    | Isolated brain trauma                     | 351  | 1.79 | 297  | 1.77 |
|                    | Monotrauma without brain trauma           | 233  | 1.19 | 196  | 1.17 |
|                    | Burns                                     | 40   | 0.20 | 38   | 0.23 |
|                    | Near-drowning                             | 4    | 0.02 | 3    | 0.02 |
|                    | Other                                     | 98   | 0.50 | 83   | 0.49 |
| <i>Other</i>       |                                           |      |      |      |      |
|                    | Other                                     | 701  | 3.58 | 579  | 3.45 |

**Table E6.** Sites of surgery.

|                                     | N            | %      | N            | %      |
|-------------------------------------|--------------|--------|--------------|--------|
| <i>Number of patients</i>           | <b>19577</b> | 100.00 | <b>16784</b> | 100.00 |
| <i>Abdominal surgery</i>            |              |        |              |        |
| Lower gastro-intestinal             | 1338         | 6.83   | 1157         | 6.89   |
| Upper gastro-intestinal             | 549          | 2.80   | 472          | 2.81   |
| Biliar tract                        | 272          | 1.39   | 227          | 1.35   |
| Liver                               | 206          | 1.05   | 178          | 1.06   |
| Pancreas                            | 182          | 0.93   | 156          | 0.93   |
| <i>Ear, nose and throat surgery</i> | 216          | 1.10   | 183          | 1.09   |
| <i>Endocrine surgery</i>            | 88           | 0.45   | 69           | 0.41   |
| <i>Gynaecological surgery</i>       | 184          | 0.94   | 163          | 0.97   |
| <i>Heart surgery</i>                |              |        |              |        |
| CABG without valvular repair        | 904          | 4.62   | 761          | 4.53   |
| Valvular, without CABG              | 430          | 2.20   | 382          | 2.28   |
| Valvular with CABG                  | 180          | 0.92   | 162          | 0.97   |
| Other                               | 143          | 0.73   | 109          | 0.65   |
| <i>Limb Surgery</i>                 | 340          | 1.74   | 300          | 1.79   |
| <i>Maxillo-facial surgery</i>       | 158          | 0.81   | 137          | 0.82   |
| <i>Neurosurgery</i>                 |              |        |              |        |
| Intracranial tumour                 | 516          | 2.64   | 432          | 2.57   |
| Cerebrovascular accident            | 432          | 2.21   | 375          | 2.23   |
| Spinal surgery                      | 189          | 0.97   | 142          | 0.85   |
| Other                               | 250          | 1.28   | 209          | 1.25   |
| <i>Obstetric surgery</i>            | 126          | 0.64   | 110          | 0.66   |
| <i>Thoracic surgery</i>             |              |        |              |        |
| Lobectomy                           | 150          | 0.77   | 117          | 0.70   |
| Pleural surgery                     | 80           | 0.41   | 73           | 0.43   |
| Pneumonectomy                       | 54           | 0.28   | 45           | 0.27   |
| Other                               | 220          | 1.12   | 196          | 1.17   |
| <i>Transplantation</i>              |              |        |              |        |
| Liver                               | 114          | 0.58   | 90           | 0.54   |
| Kidney                              | 64           | 0.33   | 55           | 0.33   |
| Lung                                | 12           | 0.06   | 8            | 0.05   |
| Heart                               | 11           | 0.06   | 11           | 0.07   |
| Kidney and pancreas                 | 6            | 0.03   | 5            | 0.03   |
| Pancreas                            | 5            | 0.03   | 3            | 0.02   |
| Heart and lung                      | 1            | 0.01   | 1            | 0.01   |
| Other                               | 4            | 0.02   | 4            | 0.02   |
| <i>Trauma</i>                       |              |        |              |        |
| Limb                                | 249          | 1.27   | 218          | 1.30   |
| Brain                               | 165          | 0.84   | 142          | 0.85   |
| Multiple                            | 115          | 0.59   | 101          | 0.60   |
| Abdomen                             | 96           | 0.49   | 82           | 0.49   |
| Thorax                              | 23           | 0.12   | 20           | 0.12   |
| <i>Vascular surgery</i>             |              |        |              |        |
| Major aortic surgery                | 541          | 2.76   | 478          | 2.85   |
| Carotid endarterectomy              | 176          | 0.90   | 155          | 0.92   |
| Other major vascular surgery        | 148          | 0.76   | 130          | 0.77   |
| Peripheral vascular surgery         | 121          | 0.62   | 107          | 0.64   |
| Other                               | 29           | 0.15   | 21           | 0.13   |
| <i>Other</i>                        | 665          | 3.40   | 562          | 3.35   |
| <i>Missing</i>                      | 1353         | 6.91   | 1103         | 6.57   |

**Table E7.** Performance of the SAPS II in the SAPS 3 Hospital Outcome Cohort.

|                                             | <b>GOF H-Test</b> | <b>p</b> | <b>GOF C-Test</b> | <b>p</b> | <b>O/E</b> | <b>CI</b>   | <b>aROC</b> |
|---------------------------------------------|-------------------|----------|-------------------|----------|------------|-------------|-------------|
| All (n = 16.784)                            | 227.21            | <0.0001  | 184.70            | <0.0001  | 1.08       | 1.06-1.1 *  | 0.831       |
| <b>AREAS</b>                                |                   |          |                   |          |            |             |             |
| Australasia                                 | 66.62             | <0.0001  | 56.80             | <0.0001  | 1.03       | 0.96-1.1    | 0.818       |
| Central and South America                   | 119.00            | <0.0001  | 121.81            | <0.0001  | 1.32       | 1.25-1.38 * | 0.828       |
| Central and WesternEurope                   | 80.70             | <0.0001  | 46.70             | <0.0001  | 0.86       | 0.81-0.91 * | 0.845       |
| Eastern Europe                              | 25.88             | 0.004    | 26.40             | 0.003    | 1.17       | 1.07-1.26 * | 0.870       |
| North America                               | 17.91             | 0.056    | 15.63             | 0.111    | 0.96       | 0.83-1.09   | 0.798       |
| Northern Europe                             | 15.53             | 0.114    | 21.87             | 0.016    | 1.21       | 1.06-1.36 * | 0.811       |
| Southern Europe and Mediterranean countries | 151.67            | <0.0001  | 144.75            | <0.0001  | 1.14       | 1.1-1.17    | 0.826       |
| <b>SUBGROUPS</b>                            |                   |          |                   |          |            |             |             |
| Trauma                                      | 19.67             | 0.033    | 20.22             | 0.027    | 0.99       | 0.9-1.07    | 0.838       |
| Surgical status: non-operative              | 356.81            | <0.0001  | 340.74            | <0.0001  | 1.16       | 1.13-1.18 * | 0.809       |
| Surgical status: scheduled                  | 20.44             | 0.025    | 18.69             | 0.044    | 0.94       | 0.87-1.01   | 0.806       |
| Surgical status: emergency                  | 27.57             | 0.002    | 25.76             | 0.004    | 0.99       | 0.94-1.04   | 0.806       |
| Infection: no infection                     | 117.83            | <0.0001  | 87.69             | <0.0001  | 1.01       | 0.98-1.04   | 0.837       |
| Infection: community acquired               | 130.28            | <0.0001  | 137.11            | <0.0001  | 1.15       | 1.1-1.2 *   | 0.770       |
| Infection: hospital acquired                | 320.50            | <0.0001  | 335.49            | <0.0001  | 1.41       | 1.34-1.47 * | 0.742       |

GOF: Hosmer-Lemeshow goodness-of-fit; O/E: observed-to-expected mortality; CI: 95% confidence interval; aROC: area under the receiver operating characteristic (curve). Non-operative admissions, Scheduled surgery, Emergency surgery: see data definitions, Appendix C, ESM;

No infection: Patients not infected at ICU admission; Community-acquired infection: Patients with community-acquired infection at ICU admission; Hospital-acquired infection: Patients with hospital-acquired infection at ICU admission; Asterix mark confidence intervals which do not overlap 1.

**Table E8.** Estimated coefficients for the variables used in the SAPS 3 model.

Estimated coefficients for the variables used in the SAPS 3 model. Estimates are presented for the overall sample and for each of the 5 sub-sets used for model development. Results are presented unrounded and rounded with respective p values.

**A. Partitioning by patients**

|                                                                                                          | All    |    |        | Part 1 |    |        | Part 2 |    |        | Part 3 |    |        | Part 4 |    |        | Part 5 |    |        |
|----------------------------------------------------------------------------------------------------------|--------|----|--------|--------|----|--------|--------|----|--------|--------|----|--------|--------|----|--------|--------|----|--------|
|                                                                                                          | Est    | R  | p      |
| Estimated Glasgow Coma Scale 3-4                                                                         | 1.4798 | 15 | <.0001 | 1.4595 | 15 | <.0001 | 1.5802 | 16 | <.0001 | 1.4665 | 15 | <.0001 | 1.4574 | 15 | <.0001 | 1.4304 | 14 | <.0001 |
| Estimated Glasgow Coma Scale 5                                                                           | 1.0252 | 10 | <.0001 | 1.0360 | 10 | <.0001 | 1.2533 | 13 | <.0001 | 0.9452 | 9  | 0.0005 | 0.8956 | 9  | 0.0008 | 0.9860 | 10 | 0.0002 |
| Estimated Glasgow Coma Scale 6                                                                           | 0.7056 | 7  | <.0001 | 0.5703 | 6  | 0.0045 | 0.9006 | 9  | <.0001 | 0.7269 | 7  | 0.0003 | 0.6097 | 6  | 0.0027 | 0.7336 | 7  | 0.0002 |
| Estimated Glasgow Coma Scale 7-12                                                                        | 0.2228 | 2  | 0.0089 | 0.1401 | 1  | 0.1435 | 0.2810 | 3  | 0.0032 | 0.2478 | 2  | 0.0087 | 0.2001 | 2  | 0.0359 | 0.2394 | 2  | 0.0113 |
| Age, 40-60 years                                                                                         | 0.5411 | 5  | <.0001 | 0.4973 | 5  | <.0001 | 0.5672 | 6  | <.0001 | 0.4737 | 5  | <.0001 | 0.5596 | 6  | <.0001 | 0.5784 | 6  | <.0001 |
| Age, 60-70 years                                                                                         | 0.8964 | 9  | <.0001 | 0.8476 | 8  | <.0001 | 0.9144 | 9  | <.0001 | 0.8859 | 9  | <.0001 | 0.9624 | 10 | <.0001 | 0.8418 | 8  | <.0001 |
| Age, 70-75 years                                                                                         | 1.3097 | 13 | <.0001 | 1.3270 | 13 | <.0001 | 1.3031 | 13 | <.0001 | 1.2413 | 12 | <.0001 | 1.3650 | 14 | <.0001 | 1.2640 | 13 | <.0001 |
| Age, 75-80 years                                                                                         | 1.4688 | 15 | <.0001 | 1.4584 | 15 | <.0001 | 1.4541 | 15 | <.0001 | 1.4495 | 14 | <.0001 | 1.4877 | 15 | <.0001 | 1.4376 | 14 | <.0001 |
| Age >= 80 years                                                                                          | 1.7922 | 18 | <.0001 | 1.7636 | 18 | <.0001 | 1.8154 | 18 | <.0001 | 1.7092 | 17 | <.0001 | 1.8878 | 19 | <.0001 | 1.7450 | 17 | <.0001 |
| Intrahospital location<br>before ICU admission: emergency room                                           | 0.4865 | 5  | <.0001 | 0.4863 | 5  | <.0001 | 0.4688 | 5  | <.0001 | 0.5695 | 6  | <.0001 | 0.4834 | 5  | <.0001 | 0.4449 | 4  | <.0001 |
| Intrahospital location<br>before ICU admission: other ICU                                                | 0.6924 | 7  | <.0001 | 0.6959 | 7  | <.0001 | 0.6899 | 7  | <.0001 | 0.6747 | 7  | <.0001 | 0.7096 | 7  | <.0001 | 0.7034 | 7  | <.0001 |
| Intrahospital location<br>before ICU admission: other                                                    | 0.7601 | 8  | <.0001 | 0.7608 | 8  | <.0001 | 0.7337 | 7  | <.0001 | 0.8250 | 8  | <.0001 | 0.7618 | 8  | <.0001 | 0.7517 | 8  | <.0001 |
| Cancer therapy (aggregated)                                                                              | 0.3231 | 3  | 0.0002 | 0.3317 | 3  | 0.0008 | 0.3248 | 3  | 0.0008 | 0.3222 | 3  | 0.0009 | 0.2885 | 3  | 0.0033 | 0.3584 | 4  | 0.0003 |
| Chronic heart failure, class IV NYHA                                                                     | 0.6196 | 6  | 0.0016 | 0.7299 | 7  | 0.0008 | 0.7429 | 7  | 0.0007 | 0.7363 | 7  | 0.0008 | 0.5987 | 6  | 0.0058 | 0.2261 | 2  | 0.3214 |
| Cirrhosis                                                                                                | 0.7737 | 8  | <.0001 | 0.8762 | 9  | <.0001 | 0.7803 | 8  | <.0001 | 0.7744 | 8  | <.0001 | 0.6982 | 7  | <.0001 | 0.7379 | 7  | <.0001 |
| Haematological cancer                                                                                    | 0.5900 | 6  | 0.0005 | 0.6391 | 6  | 0.0008 | 0.4804 | 5  | 0.0118 | 0.6655 | 7  | 0.0004 | 0.5616 | 6  | 0.003  | 0.6108 | 6  | 0.0013 |
| AIDS                                                                                                     | 0.7560 | 8  | 0.0107 | 0.6139 | 6  | 0.0598 | 1.0029 | 10 | 0.0032 | 0.9917 | 10 | 0.0028 | 0.6019 | 6  | 0.0695 | 0.6177 | 6  | 0.0611 |
| Cancer                                                                                                   | 1.0719 | 11 | <.0001 | 1.0474 | 10 | <.0001 | 1.1001 | 11 | <.0001 | 1.0544 | 11 | <.0001 | 1.0254 | 10 | <.0001 | 1.0856 | 11 | <.0001 |
| Length of stay in the hospital<br>before ICU admission: 14-28 days                                       | 0.5540 | 6  | <.0001 | 0.5921 | 6  | <.0001 | 0.6089 | 6  | <.0001 | 0.5450 | 5  | <.0001 | 0.5607 | 6  | <.0001 | 0.5070 | 5  | <.0001 |
| Length of stay in the hospital<br>before ICU admission >= 28 days                                        | 0.6893 | 7  | <.0001 | 0.6501 | 7  | <.0001 | 0.7083 | 7  | <.0001 | 0.7339 | 7  | <.0001 | 0.6513 | 7  | <.0001 | 0.7435 | 7  | <.0001 |
| Vasoactive drugs before ICU admission                                                                    | 0.2960 | 3  | <.0001 | 0.2976 | 3  | <.0001 | 0.2069 | 2  | 0.0046 | 0.3314 | 3  | <.0001 | 0.3233 | 3  | <.0001 | 0.3047 | 3  | <.0001 |
| unplanned ICU admission                                                                                  | 0.3450 | 3  | <.0001 | 0.3149 | 3  | 0.0003 | 0.3627 | 4  | <.0001 | 0.2771 | 3  | 0.0015 | 0.3512 | 4  | <.0001 | 0.4011 | 4  | <.0001 |
| Non-operative patient                                                                                    | 0.4865 | 5  | <.0001 | 0.4984 | 5  | <.0001 | 0.4885 | 5  | <.0001 | 0.4613 | 5  | <.0001 | 0.4677 | 5  | <.0001 | 0.5393 | 5  | <.0001 |
| Emergency surgery patient                                                                                | 0.6272 | 6  | <.0001 | 0.5931 | 6  | <.0001 | 0.6736 | 7  | <.0001 | 0.6354 | 6  | <.0001 | 0.6276 | 6  | <.0001 | 0.6186 | 6  | <.0001 |
| Reason for ICU admission: Cardiovascu-<br>lar: Hypovolemic, hemorrhagic shock, non-<br>hemorrhagic shock | 0.2793 | 3  | 0.0154 | 0.2758 | 3  | 0.0319 | 0.3191 | 3  | 0.0133 | 0.2216 | 2  | 0.0911 | 0.3162 | 3  | 0.014  | 0.2776 | 3  | 0.0299 |

Electronic Supplementary Material

|                                                                                                                                         | All     |     |        | Part 1  |     |        | Part 2  |     |        | Part 3  |     |        | Part 4  |    |        | Part 5  |     |        |
|-----------------------------------------------------------------------------------------------------------------------------------------|---------|-----|--------|---------|-----|--------|---------|-----|--------|---------|-----|--------|---------|----|--------|---------|-----|--------|
|                                                                                                                                         | Est     | R   | p      | Est     | R  | p      | Est     | R   | p      |
| Reason for ICU admission:<br>Cardiovascular: Septic shock                                                                               | 0.4784  | 5   | <.0001 | 0.4958  | 5   | <.0001 | 0.5579  | 6   | <.0001 | 0.4693  | 5   | 0.0001 | 0.4092  | 4  | 0.001  | 0.4737  | 5   | 0.0001 |
| Reason for ICU admission:<br>Cardiovascular: anaphylactic and mixed<br>and undefined shock                                              | 0.4939  | 5   | 0.0007 | 0.5213  | 5   | 0.0015 | 0.4494  | 4   | 0.005  | 0.5428  | 5   | 0.0007 | 0.5812  | 6  | 0.0003 | 0.4144  | 4   | 0.0126 |
| Reason for ICU admission:<br>Cardiovascular: rhythm disturbances                                                                        | -0.4856 | -5  | 0.0004 | -0.5561 | -6  | 0.0003 | -0.4191 | -4  | 0.0062 | -0.4509 | -5  | 0.003  | -0.4759 | -5 | 0.0015 | -0.5446 | -5  | 0.0004 |
| Reason for ICU admission:<br>Digestive: severe pancreatitis                                                                             | 0.9173  | 9   | <.0001 | 0.8750  | 9   | 0.0005 | 1.0670  | 11  | <.0001 | 1.0642  | 11  | <.0001 | 0.7987  | 8  | 0.0013 | 0.8175  | 8   | 0.0015 |
| Reason for ICU admission:<br>Digestive: acute abdomen and other                                                                         | 0.3450  | 3   | 0.0008 | 0.3176  | 3   | 0.0062 | 0.2883  | 3   | 0.0127 | 0.4077  | 4   | 0.0003 | 0.3899  | 4  | 0.0007 | 0.3416  | 3   | 0.0027 |
| Reason for ICU admission:<br>Hepatic: Liver failure                                                                                     | 0.5945  | 6   | 0.001  | 0.5776  | 6   | 0.0041 | 0.6352  | 6   | 0.0017 | 0.5769  | 6   | 0.0041 | 0.6247  | 6  | 0.0022 | 0.6001  | 6   | 0.0024 |
| Reason for ICU admission:<br>Neurologic: coma, stupor, obtunded pa-<br>tient, vigilance disturbances, confusion,<br>agitation, delirium | 0.3995  | 4   | 0.0002 | 0.4142  | 4   | 0.0004 | 0.3548  | 4   | 0.0026 | 0.3400  | 3   | 0.0037 | 0.4282  | 4  | 0.0003 | 0.4132  | 4   | 0.0004 |
| Reason for ICU admission:<br>Neurologic: seizures                                                                                       | -0.4308 | -4  | 0.0341 | -0.5250 | -5  | 0.0223 | -0.3256 | -3  | 0.1469 | -0.4209 | -4  | 0.0738 | -0.5332 | -5 | 0.0203 | -0.3752 | -4  | 0.0902 |
| Reason for ICU admission:<br>Neurologic: focal neurologic deficit (hemi-<br>plegia, paraplegia, tetraplegia)                            | 0.7060  | 7   | <.0001 | 0.5818  | 6   | 0.0008 | 0.8323  | 8   | <.0001 | 0.8259  | 8   | <.0001 | 0.6300  | 6  | 0.0003 | 0.6922  | 7   | <.0001 |
| Reason for ICU admission:<br>Neurologic: intracranial mass effect                                                                       | 0.9975  | 10  | <.0001 | 1.0829  | 11  | <.0001 | 1.1098  | 11  | <.0001 | 0.8989  | 9   | <.0001 | 0.8767  | 9  | <.0001 | 1.0252  | 10  | <.0001 |
| Anatomical site of surgery:<br>cerebrovascular accident                                                                                 | 0.4896  | 5   | 0.0018 | 0.5963  | 6   | 0.0006 | 0.3186  | 3   | 0.0737 | 0.5556  | 6   | 0.0012 | 0.5755  | 6  | 0.0012 | 0.4676  | 5   | 0.0075 |
| Anatomical site of surgery:<br>CABG without valvular repair                                                                             | -0.6373 | -6  | 0.0023 | -0.6986 | -7  | 0.0036 | -0.5213 | -5  | 0.0224 | -0.5527 | -6  | 0.0133 | -0.8653 | -9 | 0.0003 | -0.6376 | -6  | 0.0083 |
| Anatomical site of surgery:<br>Trauma - Other, isolated<br>(includes Thorax, Abdomen, limb)<br>and Trauma – Multiple                    | -0.8404 | -8  | <.0001 | -0.7324 | -7  | 0.0004 | -0.9793 | -10 | <.0001 | -0.8993 | -9  | <.0001 | -0.8783 | -9 | <.0001 | -0.7745 | -8  | 0.0003 |
| Anatomical site of surgery:<br>Transplantation surgery<br>(liver, kidney, pancreas, kidney and pan-<br>creas, other)                    | -1.1126 | -11 | 0.0011 | -1.0010 | -10 | 0.0058 | -1.3854 | -14 | 0.0006 | -1.2858 | -13 | 0.0011 | -0.9431 | -9 | 0.0091 | -1.0658 | -11 | 0.0058 |
| Pneumonia                                                                                                                               | 0.5403  | 5   | <.0001 | 0.4807  | 5   | <.0001 | 0.5210  | 5   | <.0001 | 0.5708  | 6   | <.0001 | 0.5711  | 6  | <.0001 | 0.5549  | 6   | <.0001 |
| Infection acquired in the hospital                                                                                                      | 0.4137  | 4   | <.0001 | 0.4389  | 4   | <.0001 | 0.4354  | 4   | <.0001 | 0.4252  | 4   | <.0001 | 0.3634  | 4  | 0.0002 | 0.3978  | 4   | <.0001 |
| Highest serum bilirubin 0-6                                                                                                             | 0.4428  | 4   | <.0001 | 0.4385  | 4   | <.0001 | 0.4088  | 4   | 0.0002 | 0.4437  | 4   | <.0001 | 0.4209  | 4  | 0.0001 | 0.5039  | 5   | <.0001 |
| Highest serum bilirubin >= 6                                                                                                            | 0.4642  | 5   | 0.0019 | 0.5372  | 5   | 0.0012 | 0.4118  | 4   | 0.0135 | 0.4433  | 4   | 0.0077 | 0.5261  | 5  | 0.0018 | 0.3805  | 4   | 0.0241 |
| Highest body temperature < 35.0                                                                                                         | 0.6802  | 7   | <.0001 | 0.6526  | 7   | <.0001 | 0.7049  | 7   | <.0001 | 0.6962  | 7   | <.0001 | 0.6139  | 6  | <.0001 | 0.6956  | 7   | <.0001 |
| Highest creatinine 0.1 – 2.0                                                                                                            | 0.1983  | 2   | 0.0008 | 0.1804  | 2   | 0.0064 | 0.1613  | 2   | 0.0145 | 0.2099  | 2   | 0.0015 | 0.1784  | 2  | 0.0068 | 0.2627  | 3   | <.0001 |
| Highest creatinine 2.0 – 3.5                                                                                                            | 0.6725  | 7   | <.0001 | 0.6661  | 7   | <.0001 | 0.6292  | 6   | <.0001 | 0.6751  | 7   | <.0001 | 0.6997  | 7  | <.0001 | 0.6961  | 7   | <.0001 |
| Highest creatinine >= 3.5                                                                                                               | 0.8048  | 8   | <.0001 | 0.7597  | 8   | <.0001 | 0.8201  | 8   | <.0001 | 0.7724  | 8   | <.0001 | 0.8407  | 8  | <.0001 | 0.8610  | 9   | <.0001 |

## Electronic Supplementary Material

|                                                                        | All    |    |        | Part 1 |    |        | Part 2 |    |        | Part 3 |    |        | Part 4 |    |        | Part 5 |    |        |
|------------------------------------------------------------------------|--------|----|--------|--------|----|--------|--------|----|--------|--------|----|--------|--------|----|--------|--------|----|--------|
|                                                                        | Est    | R  | p      |
| Highest heart rate 120-160                                             | 0.4512 | 5  | <.0001 | 0.4756 | 5  | <.0001 | 0.4569 | 5  | <.0001 | 0.4322 | 4  | <.0001 | 0.4358 | 4  | <.0001 | 0.4508 | 5  | <.0001 |
| Highest heart rate >= 160                                              | 0.6563 | 7  | <.0001 | 0.7064 | 7  | <.0001 | 0.6938 | 7  | 0.0002 | 0.5503 | 6  | 0.0018 | 0.6976 | 7  | 0.0001 | 0.6140 | 6  | 0.0004 |
| Lowest leukocytes >= 15.000                                            | 0.1526 | 2  | 0.0072 | 0.1424 | 1  | 0.0251 | 0.1692 | 2  | 0.0078 | 0.1227 | 1  | 0.053  | 0.2171 | 2  | 0.0007 | 0.1088 | 1  | 0.086  |
| Lowest pH <= 7.25                                                      | 0.2795 | 3  | <.0001 | 0.2903 | 3  | 0.0001 | 0.2678 | 3  | 0.0005 | 0.2619 | 3  | 0.0006 | 0.2500 | 3  | 0.001  | 0.3523 | 4  | <.0001 |
| Lowest platelets < 20                                                  | 1.3330 | 13 | <.0001 | 1.2194 | 12 | <.0001 | 1.3649 | 14 | <.0001 | 1.1750 | 12 | <.0001 | 1.4580 | 15 | <.0001 | 1.3883 | 14 | <.0001 |
| Lowest white platelets 20-50                                           | 0.7550 | 8  | <.0001 | 0.7341 | 7  | <.0001 | 0.8201 | 8  | <.0001 | 0.7838 | 8  | <.0001 | 0.7207 | 7  | <.0001 | 0.7018 | 7  | <.0001 |
| Lowest platelets 50-100                                                | 0.4935 | 5  | <.0001 | 0.4932 | 5  | <.0001 | 0.5085 | 5  | <.0001 | 0.5013 | 5  | <.0001 | 0.5186 | 5  | <.0001 | 0.4318 | 4  | <.0001 |
| Lowest systolic blood pressure < 40                                    | 1.1053 | 11 | <.0001 | 1.1446 | 11 | <.0001 | 1.2511 | 13 | <.0001 | 1.0803 | 11 | <.0001 | 1.0300 | 10 | <.0001 | 1.1211 | 11 | <.0001 |
| Lowest systolic blood pressure 40-70                                   | 0.8321 | 8  | <.0001 | 0.8289 | 8  | <.0001 | 0.8927 | 9  | <.0001 | 0.8469 | 8  | <.0001 | 0.8656 | 9  | <.0001 | 0.7404 | 7  | <.0001 |
| Lowest systolic blood pressure 70-120                                  | 0.3191 | 3  | <.0001 | 0.3377 | 3  | <.0001 | 0.3250 | 3  | <.0001 | 0.3020 | 3  | <.0001 | 0.2630 | 3  | <.0001 | 0.3755 | 4  | <.0001 |
| Ventilatory support and oxygenation:<br>PaO2 < 60 and no MV            | 0.5448 | 5  | <.0001 | 0.6051 | 6  | <.0001 | 0.5544 | 6  | <.0001 | 0.4656 | 5  | 0.0006 | 0.6464 | 6  | <.0001 | 0.4392 | 4  | 0.0011 |
| Ventilatory support and oxygenation:<br>PaO2/FiO2 ratio >= 200 and MV  | 0.6537 | 7  | <.0001 | 0.6285 | 6  | <.0001 | 0.6358 | 6  | <.0001 | 0.6792 | 7  | <.0001 | 0.7090 | 7  | <.0001 | 0.6215 | 6  | <.0001 |
| Ventilatory support and oxygenation:<br>PaO2/FiO2 ratio 100-200 and MV | 0.7443 | 7  | <.0001 | 0.7315 | 7  | <.0001 | 0.7422 | 7  | <.0001 | 0.7530 | 8  | <.0001 | 0.8021 | 8  | <.0001 | 0.6785 | 7  | <.0001 |
| Ventilatory support and oxygenation:<br>PaO2/iO2 ratio < 100 and MV    | 1.0677 | 11 | <.0001 | 1.1685 | 12 | <.0001 | 1.0048 | 10 | <.0001 | 1.0911 | 11 | <.0001 | 1.0483 | 10 | <.0001 | 1.0199 | 10 | <.0001 |

*Est*: Estimated coefficients, unrounded; *R*: Estimated coefficients, rounded; *p*: respective *p*-values.

**B. Partitioning by ICUs**

|                                                                                                 | All    |    |         | Part 1 |    |         | Part 2 |    |         | Part 3 |    |         | Part 4 |    |         | Part 5 |    |         |
|-------------------------------------------------------------------------------------------------|--------|----|---------|--------|----|---------|--------|----|---------|--------|----|---------|--------|----|---------|--------|----|---------|
|                                                                                                 | Est    | R  | p       |
| Estimated Glasgow Coma Scale 3-4                                                                | 1.4798 | 15 | <0.0001 | 1.4204 | 14 | <0.0001 | 1.5909 | 16 | <0.0001 | 1.4473 | 14 | <0.0001 | 1.4591 | 15 | <0.0001 | 1.4857 | 15 | <0.0001 |
| Estimated Glasgow Coma Scale 5                                                                  | 1.0252 | 10 | <0.0001 | 1.0367 | 10 | 0.0002  | 1.1156 | 11 | <0.0001 | 1.0201 | 10 | 0.0001  | 0.9584 | 10 | 0.0003  | 0.9962 | 10 | 0.0002  |
| Estimated Glasgow Coma Scale 6                                                                  | 0.7056 | 7  | <0.0001 | 0.7455 | 7  | 0.0004  | 0.8286 | 8  | <0.0001 | 0.7008 | 7  | 0.0005  | 0.6926 | 7  | 0.0007  | 0.5574 | 6  | 0.0062  |
| Estimated Glasgow Coma Scale 7-12                                                               | 0.2228 | 2  | 0.0089  | 0.1638 | 2  | 0.0921  | 0.2398 | 2  | 0.0109  | 0.2182 | 2  | 0.0191  | 0.2294 | 2  | 0.0149  | 0.2626 | 3  | 0.0077  |
| Age, 40-60 years                                                                                | 0.5411 | 5  | <0.0001 | 0.5444 | 5  | <0.0001 | 0.5163 | 5  | <0.0001 | 0.5579 | 6  | <0.0001 | 0.5581 | 6  | <0.0001 | 0.5292 | 5  | <0.0001 |
| Age, 60-70 years                                                                                | 0.8964 | 9  | <0.0001 | 0.9087 | 9  | <0.0001 | 0.8604 | 9  | <0.0001 | 0.9147 | 9  | <0.0001 | 0.9362 | 9  | <0.0001 | 0.8600 | 9  | <0.0001 |
| Age, 70-75 years                                                                                | 1.3097 | 13 | <0.0001 | 1.3326 | 13 | <0.0001 | 1.2382 | 12 | <0.0001 | 1.3137 | 13 | <0.0001 | 1.3483 | 13 | <0.0001 | 1.3195 | 13 | <0.0001 |
| Age, 75-80 years                                                                                | 1.4688 | 15 | <0.0001 | 1.4854 | 15 | <0.0001 | 1.4145 | 14 | <0.0001 | 1.4958 | 15 | <0.0001 | 1.4364 | 14 | <0.0001 | 1.5185 | 15 | <0.0001 |
| Age >= 80 years                                                                                 | 1.7922 | 18 | <0.0001 | 1.8501 | 19 | <0.0001 | 1.7048 | 17 | <0.0001 | 1.8187 | 18 | <0.0001 | 1.7833 | 18 | <0.0001 | 1.8161 | 18 | <0.0001 |
| Intrahospital location before ICU admission: emergency room                                     | 0.4865 | 5  | <0.0001 | 0.4125 | 4  | <0.0001 | 0.5189 | 5  | <0.0001 | 0.5395 | 5  | <0.0001 | 0.4843 | 5  | <0.0001 | 0.4689 | 5  | <0.0001 |
| Intrahospital location before ICU admission: other ICU                                          | 0.6924 | 7  | <0.0001 | 0.6988 | 7  | <0.0001 | 0.6596 | 7  | <0.0001 | 0.7426 | 7  | <0.0001 | 0.692  | 7  | <0.0001 | 0.6636 | 7  | <0.0001 |
| Intrahospital location before ICU admission: other                                              | 0.7601 | 8  | <0.0001 | 0.7247 | 7  | <0.0001 | 0.7350 | 7  | <0.0001 | 0.7732 | 8  | <0.0001 | 0.7813 | 8  | <0.0001 | 0.7837 | 8  | <0.0001 |
| Cancer therapy (aggregated)                                                                     | 0.3231 | 3  | 0.0002  | 0.3124 | 3  | 0.0014  | 0.3656 | 4  | 0.0003  | 0.3598 | 4  | 0.0002  | 0.3723 | 4  | 0.0002  | 0.2103 | 2  | 0.0369  |
| Chronic heart failure, class IV NYHA                                                            | 0.6196 | 6  | 0.0016  | 0.638  | 6  | 0.0032  | 0.4736 | 5  | 0.0328  | 0.6238 | 6  | 0.0069  | 0.681  | 7  | 0.0026  | 0.6789 | 7  | 0.0012  |
| Cirrhosis                                                                                       | 0.7737 | 8  | <0.0001 | 0.7585 | 8  | <0.0001 | 0.8968 | 9  | <0.0001 | 0.7239 | 7  | <0.0001 | 0.7343 | 7  | <0.0001 | 0.7531 | 8  | <0.0001 |
| Haematological cancer                                                                           | 0.5900 | 6  | 0.0005  | 0.6493 | 6  | 0.0007  | 0.5636 | 6  | 0.0035  | 0.2741 | 3  | 0.139   | 0.6468 | 6  | 0.0005  | 0.8384 | 8  | <0.0001 |
| AIDS                                                                                            | 0.7560 | 8  | 0.0107  | 0.7671 | 8  | 0.0131  | 0.6817 | 7  | 0.0659  | 0.7283 | 7  | 0.0281  | 0.7912 | 8  | 0.0147  | 0.7951 | 8  | 0.0163  |
| Cancer                                                                                          | 1.0719 | 11 | <0.0001 | 1.042  | 10 | <0.0001 | 1.0421 | 10 | <0.0001 | 1.1316 | 11 | <0.0001 | 0.9784 | 10 | <0.0001 | 1.1711 | 12 | <0.0001 |
| Length of stay in the hospital before ICU admission: 14-28 days                                 | 0.5540 | 6  | <0.0001 | 0.5382 | 5  | <0.0001 | 0.4638 | 5  | <0.0001 | 0.5516 | 6  | <0.0001 | 0.5667 | 6  | <0.0001 | 0.6659 | 7  | <0.0001 |
| Length of stay in the hospital before ICU admission >= 28 days                                  | 0.6893 | 7  | <0.0001 | 0.66   | 7  | <0.0001 | 0.6469 | 6  | <0.0001 | 0.7184 | 7  | <0.0001 | 0.7535 | 8  | <0.0001 | 0.6654 | 7  | <0.0001 |
| Vasoactive drugs before ICU admission                                                           | 0.2960 | 3  | <0.0001 | 0.2853 | 3  | <0.0001 | 0.3227 | 3  | <0.0001 | 0.2892 | 3  | <0.0001 | 0.303  | 3  | <0.0001 | 0.2888 | 3  | 0.0001  |
| unlanned ICU admission                                                                          | 0.3450 | 3  | <0.0001 | 0.3143 | 3  | 0.0003  | 0.2986 | 3  | 0.0007  | 0.4110 | 4  | <0.0001 | 0.3633 | 4  | <0.0001 | 0.3443 | 3  | 0.0002  |
| Non-operative patient                                                                           | 0.4865 | 5  | <0.0001 | 0.5598 | 6  | <0.0001 | 0.4725 | 5  | <0.0001 | 0.4423 | 4  | <0.0001 | 0.4671 | 5  | <0.0001 | 0.5026 | 5  | <0.0001 |
| Emergency surgery patient                                                                       | 0.6272 | 6  | <0.0001 | 0.6351 | 6  | <0.0001 | 0.6467 | 6  | <0.0001 | 0.5327 | 5  | <0.0001 | 0.6548 | 7  | <0.0001 | 0.6744 | 7  | <0.0001 |
| Reason for ICU admission: Cardiovascular: Hypovolemic, hemorrhagic shock, non-hemorrhagic shock | 0.2793 | 3  | 0.0154  | 0.3576 | 4  | 0.0051  | 0.3048 | 3  | 0.0184  | 0.2441 | 2  | 0.0535  | 0.1569 | 2  | 0.2401  | 0.3222 | 3  | 0.0129  |
| Reason for ICU admission: Cardiovascular: Septic shock                                          | 0.4784 | 5  | <0.0001 | 0.5578 | 6  | <0.0001 | 0.3772 | 4  | 0.0026  | 0.5338 | 5  | <0.0001 | 0.4673 | 5  | 0.0001  | 0.4594 | 5  | 0.0003  |



## Electronic Supplementary Material

|                                                                                                                              | All     |     |         | Part 1  |     |         | Part 2  |    |         | Part 3  |     |         | Part 4  |     |         | Part 5  |     |         |
|------------------------------------------------------------------------------------------------------------------------------|---------|-----|---------|---------|-----|---------|---------|----|---------|---------|-----|---------|---------|-----|---------|---------|-----|---------|
|                                                                                                                              | Est     | R   | p       | Est     | R   | p       | Est     | R  | p       | Est     | R   | p       | Est     | R   | p       | Est     | R   | p       |
| Reason for ICU admission: Cardiovascular: anaphylactic and mixed and undefined shock                                         | 0.4939  | 5   | 0.0007  | 0.5284  | 5   | 0.0010  | 0.4468  | 4  | 0.0085  | 0.5488  | 5   | 0.0005  | 0.4779  | 5   | 0.0041  | 0.4647  | 5   | 0.0038  |
| Reason for ICU admission: Cardiovascular: rhythm disturbances                                                                | -0.4856 | -5  | 0.0004  | -0.5433 | -5  | 0.0002  | -0.5599 | -6 | 0.0005  | -0.4527 | -5  | 0.0018  | -0.3872 | -4  | 0.0136  | -0.4822 | -5  | 0.0016  |
| Reason for ICU admission: Digestive: severe pancreatitis                                                                     | 0.9173  | 9   | <0.0001 | 0.9254  | 9   | 0.0002  | 0.8106  | 8  | 0.0026  | 1.0475  | 10  | <0.0001 | 0.9971  | 10  | <0.0001 | 0.7922  | 8   | 0.0019  |
| Reason for ICU admission: Digestive: acute abdomen and other                                                                 | 0.3450  | 3   | 0.0008  | 0.3482  | 3   | 0.0027  | 0.3434  | 3  | 0.0027  | 0.3881  | 4   | 0.0006  | 0.3148  | 3   | 0.0051  | 0.3382  | 3   | 0.0045  |
| Reason for ICU admission: Hepatic: Liver failure                                                                             | 0.5945  | 6   | 0.001   | 0.527   | 5   | 0.0071  | 0.6224  | 6  | 0.0027  | 0.5108  | 5   | 0.0099  | 0.7114  | 7   | 0.0005  | 0.6342  | 6   | 0.0019  |
| Reason for ICU admission: Neurologic: coma, stupor, obtunded patient, vigilance disturbances, confusion, agitation, delirium | 0.3995  | 4   | 0.0002  | 0.4496  | 4   | <0.0001 | 0.3418  | 3  | 0.004   | 0.3929  | 4   | 0.0009  | 0.4702  | 5   | <0.0001 | 0.3464  | 3   | 0.0049  |
| Reason for ICU admission: Neurologic: seizures                                                                               | -0.4308 | -4  | 0.0341  | -0.4317 | -4  | 0.0478  | -0.3705 | -4 | 0.1165  | -0.3625 | -4  | 0.1023  | -0.4902 | -5  | 0.0313  | -0.4992 | -5  | 0.0352  |
| Reason for ICU admission: Neurologic: focal neurologic deficit (hemiplegia, paraplegia, tetraplegia)                         | 0.7060  | 7   | <0.0001 | 0.7657  | 8   | <0.0001 | 0.7974  | 8  | <0.0001 | 0.6538  | 7   | 0.0002  | 0.6098  | 6   | 0.0003  | 0.7088  | 7   | <0.0001 |
| Reason for ICU admission: Neurologic: intracranial mass effect                                                               | 0.9975  | 10  | <0.0001 | 0.9281  | 9   | <0.0001 | 1.0014  | 10 | <0.0001 | 1.2256  | 12  | <0.0001 | 0.9273  | 9   | <0.0001 | 0.9073  | 9   | <0.0001 |
| Anatomical site of surgery: cerebrovascular accident                                                                         | 0.4896  | 5   | 0.0018  | 0.5787  | 6   | 0.0010  | 0.3975  | 4  | 0.0191  | 0.5550  | 6   | 0.0014  | 0.4694  | 5   | 0.0076  | 0.4735  | 5   | 0.0100  |
| Anatomical site of surgery: CABG without valvular repair                                                                     | -0.6373 | -6  | 0.0023  | -0.529  | -5  | 0.0215  | -0.7633 | -8 | 0.0008  | -0.3993 | -4  | 0.1153  | -0.6966 | -7  | 0.0028  | -0.7258 | -7  | 0.0017  |
| Anatomical site of surgery: Trauma - Other, isolated (includes Thorax, Abdomen, limb) and Trauma – Multiple                  | -0.8404 | -8  | <0.0001 | -0.8052 | -8  | 0.0003  | -0.7950 | -8 | 0.0002  | -0.7729 | -8  | 0.0005  | -0.8175 | -8  | 0.0001  | -1.0259 | -10 | <0.0001 |
| Anatomical site of surgery: Transplantation surgery (liver, kidney, pancreas, kidney and pancreas, other)                    | -1.1126 | -11 | 0.0011  | -1.0898 | -11 | 0.0031  | -0.8491 | -8 | 0.0353  | -0.9957 | -10 | 0.0068  | -1.5886 | -16 | 0.0001  | -0.9536 | -10 | 0.0081  |
| Pneumonia                                                                                                                    | 0.5403  | 5   | <0.0001 | 0.5653  | 6   | <0.0001 | 0.5730  | 6  | <0.0001 | 0.4900  | 5   | <0.0001 | 0.5245  | 5   | <0.0001 | 0.5568  | 6   | <0.0001 |
| Infection acquired in the hospital                                                                                           | 0.4137  | 4   | <0.0001 | 0.335   | 3   | 0.0004  | 0.4593  | 5  | <0.0001 | 0.3989  | 4   | <0.0001 | 0.4257  | 4   | <0.0001 | 0.4576  | 5   | <0.0001 |
| Highest serum bilirubin 0-6                                                                                                  | 0.4428  | 4   | <0.0001 | 0.4374  | 4   | <0.0001 | 0.4324  | 4  | <0.0001 | 0.4257  | 4   | <0.0001 | 0.4636  | 5   | <0.0001 | 0.4515  | 5   | <0.0001 |
| Highest serum bilirubin >= 6                                                                                                 | 0.4642  | 5   | 0.0019  | 0.4028  | 4   | 0.0149  | 0.5902  | 6  | 0.0005  | 0.5696  | 6   | 0.0009  | 0.4129  | 4   | 0.0118  | 0.3455  | 3   | 0.0407  |
| Highest body temperature < 35.0                                                                                              | 0.6802  | 7   | <0.0001 | 0.5646  | 6   | <0.0001 | 0.6779  | 7  | <0.0001 | 0.7992  | 8   | <0.0001 | 0.6538  | 7   | <0.0001 | 0.7270  | 7   | <0.0001 |
| Highest creatinine 0.1 – 2.0                                                                                                 | 0.1983  | 2   | 0.0008  | 0.2046  | 2   | 0.0019  | 0.1644  | 2  | 0.013   | 0.1708  | 2   | 0.0085  | 0.2547  | 3   | 0.0001  | 0.1968  | 2   | 0.0037  |
| Highest creatinine 2.0 – 3.5                                                                                                 | 0.6725  | 7   | <0.0001 | 0.6228  | 6   | <0.0001 | 0.7118  | 7  | <0.0001 | 0.6204  | 6   | <0.0001 | 0.7219  | 7   | <0.0001 | 0.6867  | 7   | <0.0001 |
| Highest creatinine >= 3.5                                                                                                    | 0.8048  | 8   | <0.0001 | 0.7405  | 7   | <0.0001 | 0.7915  | 8  | <0.0001 | 0.8428  | 8   | <0.0001 | 0.8652  | 9   | <0.0001 | 0.7778  | 8   | <0.0001 |
| Highest heart rate 120-160                                                                                                   | 0.4512  | 5   | <0.0001 | 0.4824  | 5   | <0.0001 | 0.4507  | 5  | <0.0001 | 0.4296  | 4   | <0.0001 | 0.4444  | 4   | <0.0001 | 0.4569  | 5   | <0.0001 |
| Highest heart rate >= 160                                                                                                    | 0.6563  | 7   | <0.0001 | 0.6865  | 7   | <0.0001 | 0.6246  | 6  | 0.0006  | 0.6128  | 6   | 0.0003  | 0.6151  | 6   | 0.0008  | 0.7645  | 8   | <0.0001 |

Electronic Supplementary Material

|                                       | All    |    |         | Part 1 |    |         | Part 2 |    |         | Part 3 |    |         | Part 4 |    |         | Part 5 |    |         |
|---------------------------------------|--------|----|---------|--------|----|---------|--------|----|---------|--------|----|---------|--------|----|---------|--------|----|---------|
|                                       | Est    | R  | p       |
| Lowest leukocytes >= 15.000           | 0.1526 | 2  | 0.0072  | 0.1596 | 2  | 0.0117  | 0.1029 | 1  | 0.1025  | 0.1912 | 2  | 0.0022  | 0.1181 | 1  | 0.0627  | 0.1933 | 2  | 0.0034  |
| Lowest pH <= 7.25                     | 0.2795 | 3  | <0.0001 | 0.2709 | 3  | 0.0004  | 0.3641 | 4  | <0.0001 | 0.2315 | 2  | 0.002   | 0.3108 | 3  | <0.0001 | 0.2159 | 2  | 0.0062  |
| Lowest platelets < 20                 | 1.3330 | 13 | <0.0001 | 1.3543 | 14 | <0.0001 | 1.4053 | 14 | <0.0001 | 1.4824 | 15 | <0.0001 | 1.1999 | 12 | <0.0001 | 1.2450 | 12 | <0.0001 |
| Lowest west platelets 20-50           | 0.7550 | 8  | <0.0001 | 0.803  | 8  | <0.0001 | 0.7641 | 8  | <0.0001 | 0.8699 | 9  | <0.0001 | 0.6737 | 7  | <0.0001 | 0.6723 | 7  | <0.0001 |
| Lowest platelets 50-100               | 0.4935 | 5  | <0.0001 | 0.5041 | 5  | <0.0001 | 0.4877 | 5  | <0.0001 | 0.5213 | 5  | <0.0001 | 0.4067 | 4  | <0.0001 | 0.5531 | 6  | <0.0001 |
| Lowest systolic blood pressure < 40   | 1.1053 | 11 | <0.0001 | 1.0783 | 11 | <0.0001 | 1.0973 | 11 | <0.0001 | 1.1530 | 12 | <0.0001 | 1.1046 | 11 | <0.0001 | 1.1029 | 11 | <0.0001 |
| Lowest systolic blood pressure 40-70  | 0.8321 | 8  | <0.0001 | 0.8364 | 8  | <0.0001 | 0.7868 | 8  | <0.0001 | 0.8530 | 9  | <0.0001 | 0.7775 | 8  | <0.0001 | 0.8994 | 9  | <0.0001 |
| Lowest systolic blood pressure 70-120 | 0.3191 | 3  | <0.0001 | 0.3065 | 3  | <0.0001 | 0.3175 | 3  | <0.0001 | 0.3202 | 3  | <0.0001 | 0.2988 | 3  | <0.0001 | 0.3582 | 4  | <0.0001 |

*Est*: Estimated coefficients, unrounded; *R*: Estimated coefficients, rounded; *p*: respective *p*-values.

**Table E9.** Hosmer-Lemeshow tests for the SAPS 3 in the overall sample.

| Probability of death | Observed Survivors | Expected Survivors | Observed Deaths | Expected Deaths |
|----------------------|--------------------|--------------------|-----------------|-----------------|
| 0.0 - 0.1            | 6819               | 6788.33            | 286             | 316.67          |
| 0.1 - 0.2            | 2231               | 2248.92            | 401             | 383.08          |
| 0.2 - 0.3            | 1539               | 1538.14            | 504             | 504.86          |
| 0.3 - 0.4            | 875                | 873.10             | 476             | 477.90          |
| 0.4 - 0.5            | 472                | 489.29             | 417             | 399.71          |
| 0.5 - 0.6            | 419                | 413.14             | 486             | 491.86          |
| 0.6 - 0.7            | 257                | 274.44             | 516             | 498.56          |
| 0.7 - 0.8            | 156                | 150.35             | 442             | 447.65          |
| 0.8 - 0.9            | 58                 | 55.13              | 309             | 311.87          |
| 0.9 - 1.0            | 13                 | 8.36               | 108             | 112.64          |

Hosmer-Lemeshow Goodness-of-fit Test test  $\hat{H} = 10.56$  ( $p = 0.39$ )

| Probability of death | Observed Survivors | Expected Survivors | Observed Deaths | Expected Deaths |
|----------------------|--------------------|--------------------|-----------------|-----------------|
| 0.000 - 0.018        | 1566               | 1574.97            | 26              | 17.03           |
| 0.021 - 0.035        | 1704               | 1700.50            | 45              | 48.50           |
| 0.040 - 0.057        | 1586               | 1570.81            | 65              | 80.19           |
| 0.064 - 0.089        | 1549               | 1538.32            | 116             | 126.68          |
| 0.099 - 0.133        | 1484               | 1474.85            | 183             | 192.15          |
| 0.145 - 0.205        | 1454               | 1480.78            | 340             | 313.22          |
| 0.221 - 0.295        | 1246               | 1235.15            | 416             | 426.85          |
| 0.315 - 0.419        | 992                | 1009.00            | 593             | 576.00          |
| 0.440 - 0.604        | 816                | 826.36             | 895             | 884.64          |
| 0.622 - 1.000        | 442                | 428.45             | 1266            | 1279.55         |

Hosmer-Lemeshow Goodness-of-fit Test test  $\hat{C} = 14.29$  ( $p = 0.16$ )

**Table E10.** Number of patients and O/E ratios (SAPS 3) by country.

| Region                                      | Country            | N    | OBS | EXP   | OE  | OELI | OERE  |
|---------------------------------------------|--------------------|------|-----|-------|-----|------|-------|
| Central and South America                   | Argentina          | 440  | 146 | 106.7 | 1.4 | 1.23 | 1.507 |
| Australasia                                 | Australia          | 651  | 138 | 165.3 | 0.8 | 0.73 | 0.943 |
| Central and Western Europe                  | Austria            | 657  | 130 | 166.6 | 0.8 | 0.67 | 0.89  |
| Central and Western Europe                  | Belgium            | 795  | 130 | 145.1 | 0.9 | 0.77 | 1.02  |
| Central and South America                   | Brasil             | 1483 | 359 | 281.3 | 1.3 | 1.19 | 1.365 |
| Eastern Europe                              | Bulgaria           | 69   | 4   | 3.772 | 1.1 | 0.14 | 1.98  |
| North America                               | Canada             | 414  | 65  | 79.47 | 0.8 | 0.66 | 0.979 |
| Central and South America                   | Cuba               | 32   | 9   | 6.302 | 1.4 | 0.81 | 2.049 |
| Eastern Europe                              | Czech Republik     | 265  | 89  | 87.01 | 1   | 0.88 | 1.161 |
| Northern Europe                             | Denmark            | 60   | 23  | 21.41 | 1.1 | 0.78 | 1.368 |
| Southern Europe and Mediterranean countries | France             | 543  | 133 | 164.6 | 0.8 | 0.7  | 0.915 |
| Central and Western Europe                  | Germany            | 430  | 52  | 61.1  | 0.9 | 0.65 | 1.052 |
| Southern Europe and Mediterranean countries | Greece             | 371  | 110 | 103.7 | 1.1 | 0.93 | 1.195 |
| Australasia                                 | Hongkong           | 573  | 99  | 145.6 | 0.7 | 0.56 | 0.797 |
| Eastern Europe                              | Hungary            | 340  | 69  | 64.56 | 1.1 | 0.89 | 1.246 |
| Australasia                                 | India              | 532  | 152 | 111.9 | 1.4 | 1.22 | 1.501 |
| Central and Western Europe                  | Ireland            | 27   | 13  | 8.705 | 1.5 | 1.04 | 1.945 |
| Southern Europe and Mediterranean countries | Israel             | 93   | 12  | 13.43 | 0.9 | 0.45 | 1.341 |
| Southern Europe and Mediterranean countries | Italy              | 2521 | 628 | 674.9 | 0.9 | 0.88 | 0.984 |
| Central and Western Europe                  | Luxembourg         | 163  | 26  | 34.71 | 0.7 | 0.5  | 0.996 |
| Central and South America                   | Mexico             | 175  | 62  | 49.26 | 1.3 | 1.06 | 1.458 |
| Central and Western Europe                  | Netherlands        | 458  | 73  | 90.82 | 0.8 | 0.66 | 0.949 |
| Northern Europe                             | Norway             | 155  | 55  | 55.69 | 1   | 0.8  | 1.171 |
| Eastern Europe                              | Poland             | 5    | 5   | 3.717 | 1.3 | 0.87 | 1.821 |
| Southern Europe and Mediterranean countries | Portugal           | 1307 | 462 | 441.3 | 1   | 0.98 | 1.11  |
| Eastern Europe                              | Russian Federation | 1    | 0   | 0.089 | -   | -    | -     |
| Eastern Europe                              | Serbia             | 11   | 7   | 3.421 | 2   | 1.27 | 2.822 |
| Eastern Europe                              | Slovakia           | 61   | 22  | 17.6  | 1.2 | 0.92 | 1.581 |
| Eastern Europe                              | Slovenia           | 136  | 33  | 29.75 | 1.1 | 0.84 | 1.379 |
| Southern Europe and Mediterranean countries | Spain              | 1652 | 365 | 323.7 | 1.1 | 1.04 | 1.211 |
| Northern Europe                             | Sweden             | 124  | 27  | 32.41 | 0.8 | 0.58 | 1.088 |
| Central and Western Europe                  | Switzerland        | 1163 | 131 | 188.4 | 0.7 | 0.58 | 0.81  |
| Southern Europe and Mediterranean countries | Turkey             | 261  | 108 | 67.69 | 1.6 | 1.42 | 1.768 |
| Central and Western Europe                  | United Kingdom     | 499  | 151 | 140.4 | 1.1 | 0.95 | 1.197 |
| North America                               | United States      | 317  | 57  | 54.43 | 1   | 0.83 | 1.264 |

N = number of patients; OBS: observed deaths; EXP: Expected deaths; OE: Observed-to-expected ratio; OELI / OERE: upper and lower border of the 95% confidence interval;

**Table E11.** O/E ratios (SAPS 3) for the customized equations by country.

| Region                                      | Country            | N    | OBS | EXP    | OE   | OELI  | OERE |
|---------------------------------------------|--------------------|------|-----|--------|------|-------|------|
| Central and South America                   | Argentina          | 440  | 146 | 137,41 | 1,06 | 0,95  | 1,17 |
| Australasia                                 | Australia          | 651  | 138 | 152,29 | 0,91 | 0,79  | 1,02 |
| Central and Western Europe                  | Austria            | 657  | 130 | 144,17 | 0,90 | 0,78  | 1,02 |
| Central and Western Europe                  | Belgium            | 795  | 130 | 121,49 | 1,07 | 0,93  | 1,21 |
| Central and South America                   | Brasil             | 1483 | 359 | 367,12 | 0,98 | 0,91  | 1,05 |
| Eastern Europe                              | Bulgaria           | 69   | 4   | 3,47   | 1,15 | 0,22  | 2,09 |
| North America                               | Canada             | 414  | 65  | 71,86  | 0,90 | 0,72  | 1,09 |
| Central and South America                   | Cuba               | 32   | 9   | 8,38   | 1,07 | 0,57  | 1,58 |
| Eastern Europe                              | Czech Republik     | 265  | 89  | 96,24  | 0,92 | 0,81  | 1,04 |
| Northern Europe                             | Denmark            | 60   | 23  | 20,63  | 1,11 | 0,81  | 1,41 |
| Southern Europe and Mediterranean countries | France             | 543  | 133 | 167,07 | 0,80 | 0,69  | 0,90 |
| Central and Western Europe                  | Germany            | 430  | 52  | 49,78  | 1,04 | 0,82  | 1,27 |
| Southern Europe and Mediterranean countries | Greece             | 371  | 110 | 105,00 | 1,05 | 0,91  | 1,18 |
| Australasia                                 | Hongkong           | 573  | 99  | 134,10 | 0,74 | 0,61  | 0,86 |
| Eastern Europe                              | Hungary            | 340  | 69  | 69,52  | 0,99 | 0,84  | 1,15 |
| Australasia                                 | India              | 532  | 152 | 102,60 | 1,48 | 1,33  | 1,63 |
| Central and Western Europe                  | Ireland            | 27   | 13  | 7,72   | 1,68 | 1,20  | 2,17 |
| Southern Europe and Mediterranean countries | Israel             | 93   | 12  | 14,07  | 0,85 | 0,42  | 1,29 |
| Southern Europe and Mediterranean countries | Italy              | 2521 | 628 | 685,03 | 0,92 | 0,86  | 0,97 |
| Central and Western Europe                  | Luxembourg         | 163  | 26  | 29,56  | 0,88 | 0,61  | 1,15 |
| Central and South America                   | Mexico             | 175  | 62  | 62,92  | 0,99 | 0,82  | 1,15 |
| Central and Western Europe                  | Netherlands        | 458  | 73  | 78,70  | 0,93 | 0,77  | 1,08 |
| Northern Europe                             | Norway             | 155  | 55  | 53,65  | 1,03 | 0,84  | 1,21 |
| Eastern Europe                              | Poland             | 5    | 5   | 4,14   | 1,21 | 0,85  | 1,57 |
| Southern Europe and Mediterranean countries | Portugal           | 1307 | 462 | 444,61 | 1,04 | 0,98  | 1,10 |
| Eastern Europe                              | Russian Federation | 1    | 0   | 0,08   | 0,00 | -6,81 | 6,81 |
| Eastern Europe                              | Serbia             | 11   | 7   | 3,74   | 1,87 | 1,17  | 2,57 |
| Eastern Europe                              | Slovakia           | 61   | 22  | 19,40  | 1,13 | 0,85  | 1,42 |
| Eastern Europe                              | Slovenia           | 136  | 33  | 32,41  | 1,02 | 0,78  | 1,26 |
| Southern Europe and Mediterranean countries | Spain              | 1652 | 365 | 333,26 | 1,10 | 1,01  | 1,18 |
| Northern Europe                             | Sweden             | 124  | 27  | 30,71  | 0,88 | 0,62  | 1,14 |
| Central and Western Europe                  | Switzerland        | 1163 | 131 | 153,79 | 0,85 | 0,72  | 0,98 |
| Southern Europe and Mediterranean countries | Turkey             | 261  | 108 | 68,84  | 1,57 | 1,40  | 1,74 |
| Central and Western Europe                  | United Kingdom     | 499  | 151 | 120,88 | 1,25 | 1,12  | 1,38 |
| North America                               | United States      | 317  | 57  | 50,15  | 1,14 | 0,90  | 1,37 |

N = number of patients; OBS: observed deaths; EXP: Expected deaths; OE: Observed-to-expected ratio; OELI / OERE: upper and lower border of the 95% confidence interval;

## Appendix B. Additional figures.

### B.1. Calibration curves and Hosmer-Lemeshow goodness-of-fit tests for the SAPS 3.

**Australasia (n = 1756):**

aROC: 0.839

Hosmer-Lemeshow goodness-of-fit test  $\hat{H}$ : 15.25, p = 0.12

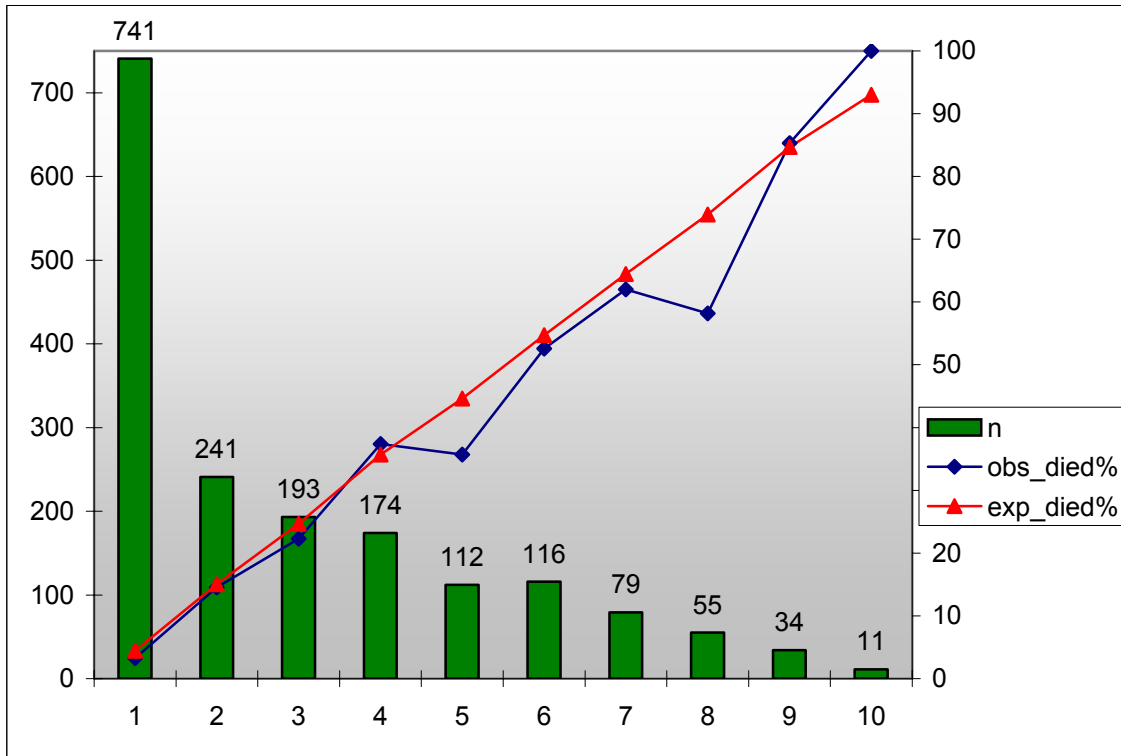

Hosmer-Lemeshow goodness-of-fit test  $\hat{C}$ : 8.09, p = 0.62

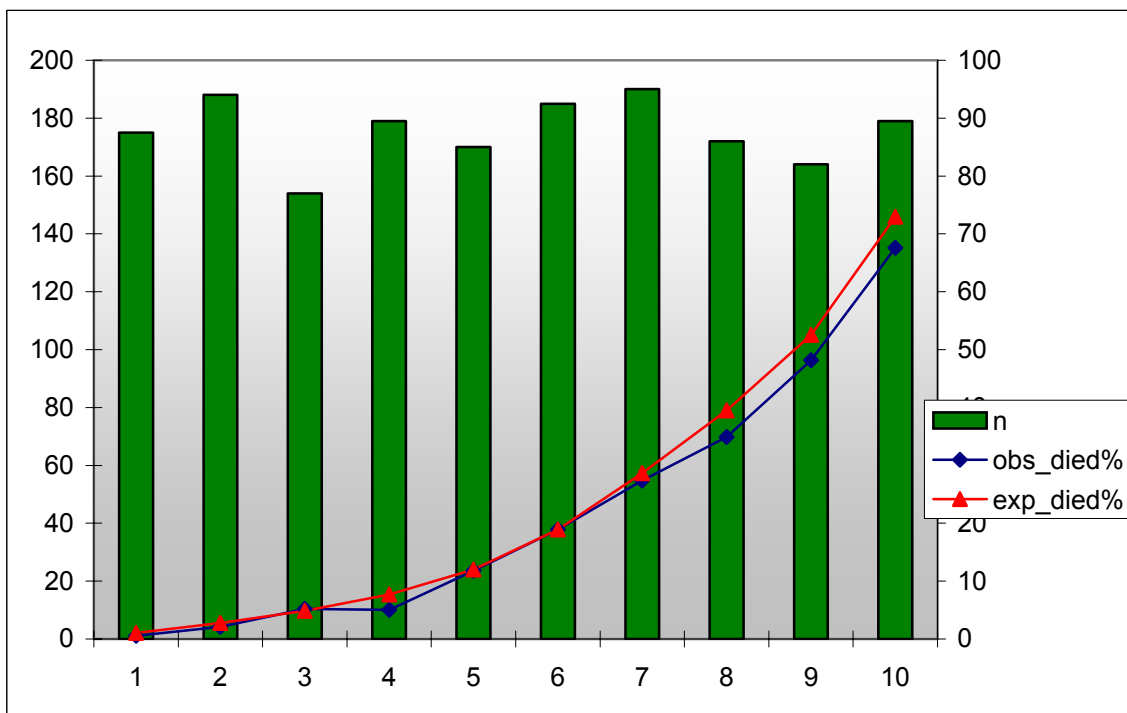

**Central and South America (n = 2130):**

aROC: 0.855

Hosmer-Lemeshow goodness-of-fit test  $\hat{H}$ : 78.01,  $p < 0.01$

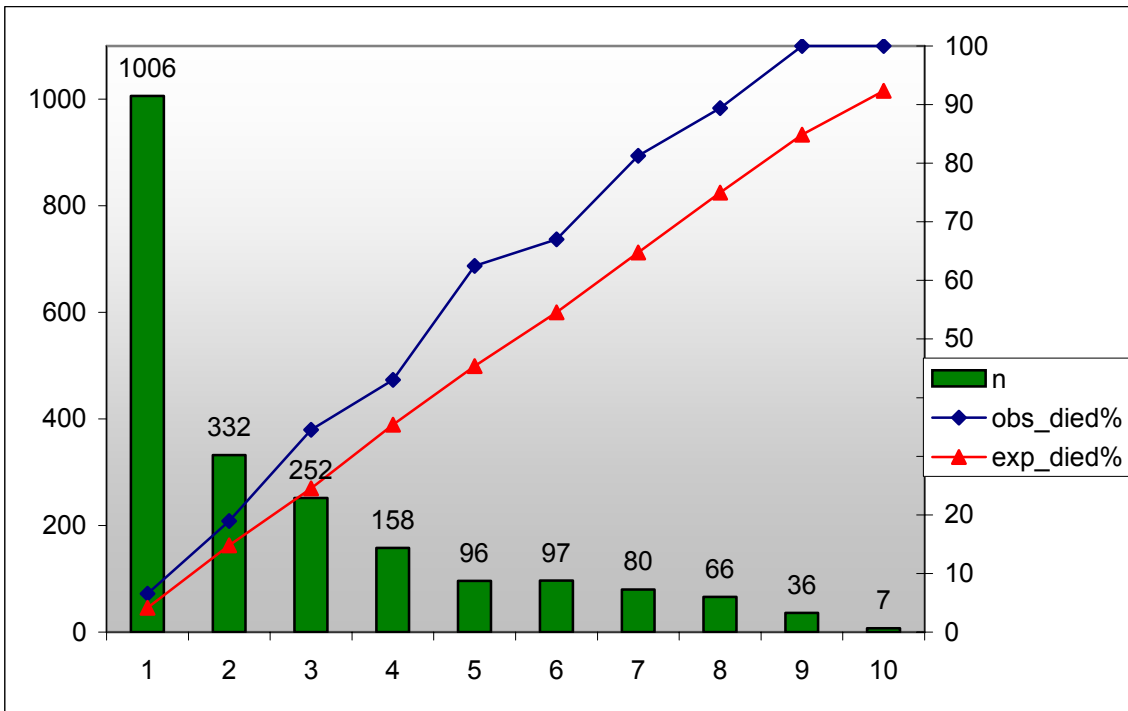

Hosmer-Lemeshow goodness-of-fit test  $\hat{C}$ : 80.82,  $p < 0.01$

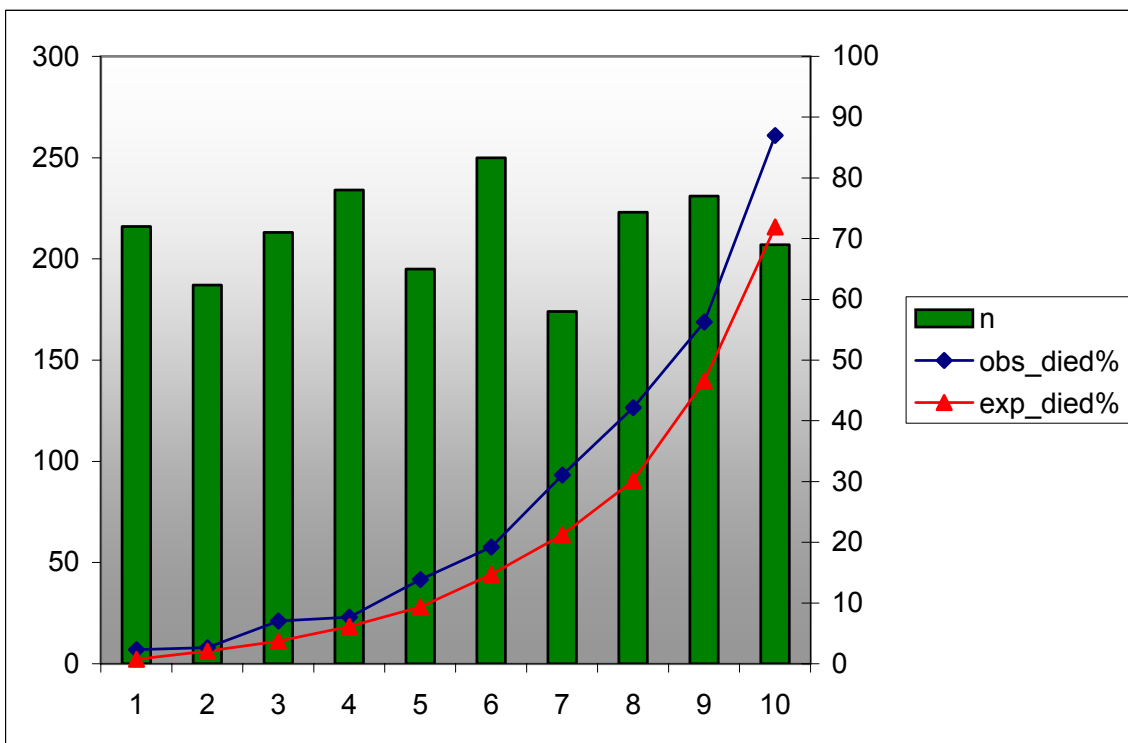

**Central and Western Europe (n = 4192):**

aROC: 0.861

Hosmer-Lemeshow goodness-of-fit test  $\hat{H}$ : 56.45,  $p < 0.01$

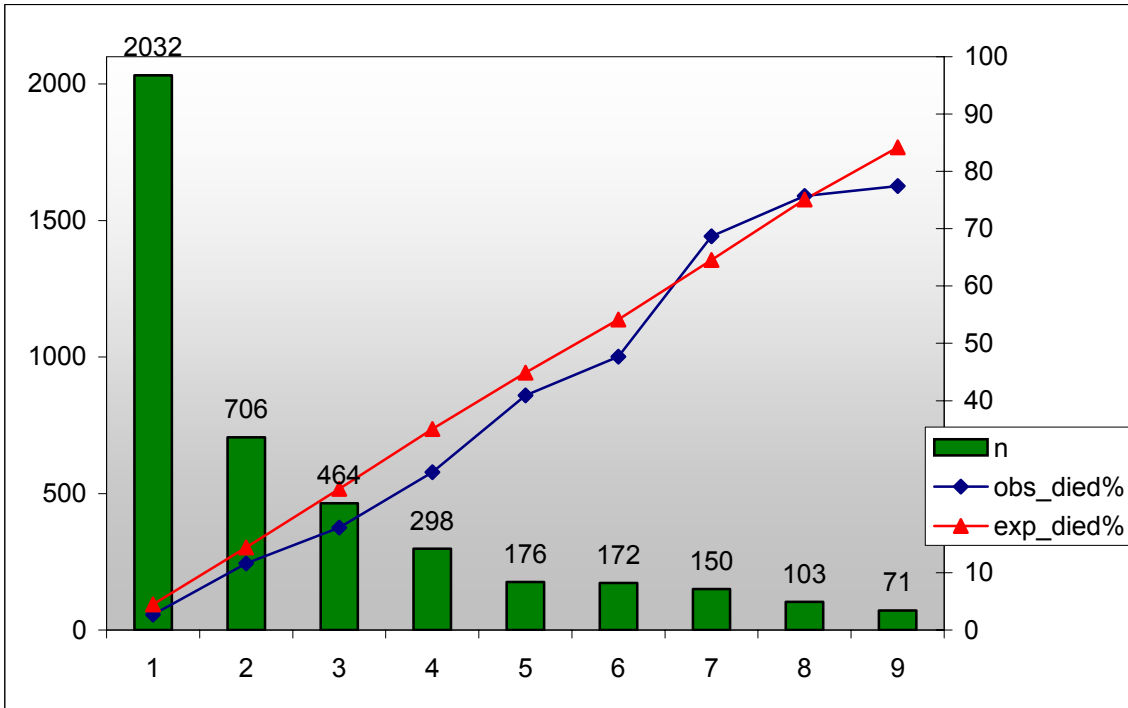

Hosmer-Lemeshow goodness-of-fit test  $\hat{C}$ : 47.89,  $p < 0.01$

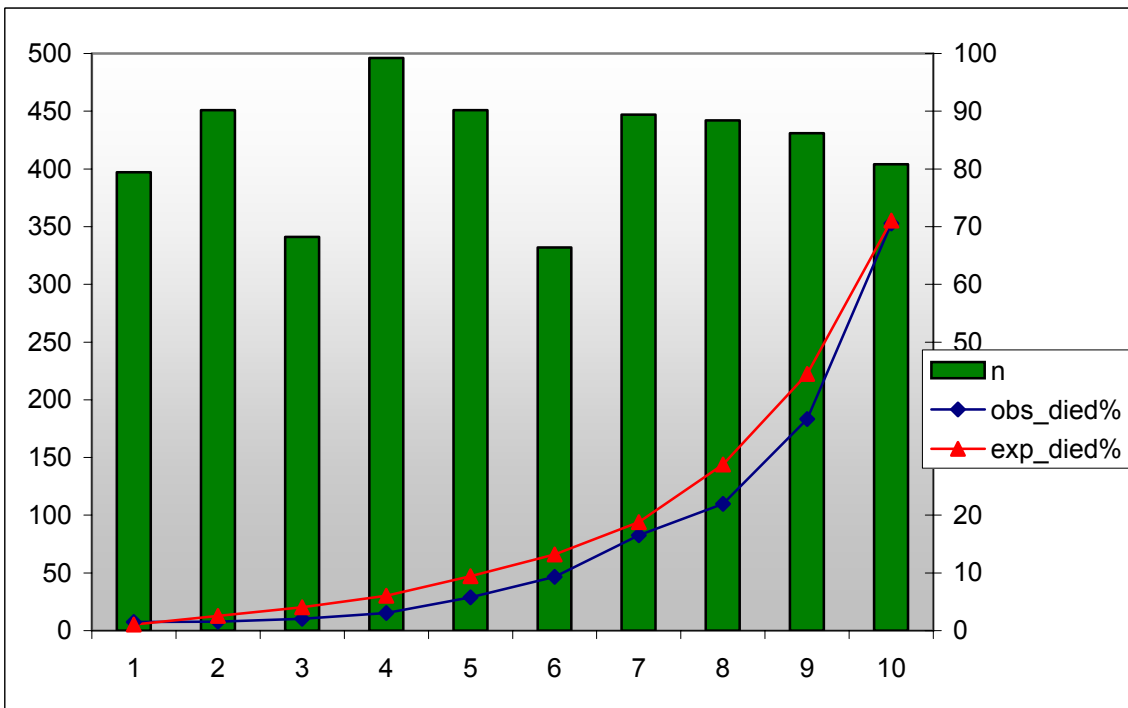



**Eastern Europe (n = 888):**

aROC: 0.903

Hosmer-Lemeshow goodness-of-fit test  $\hat{H}$ : 19.45, p = 0.03

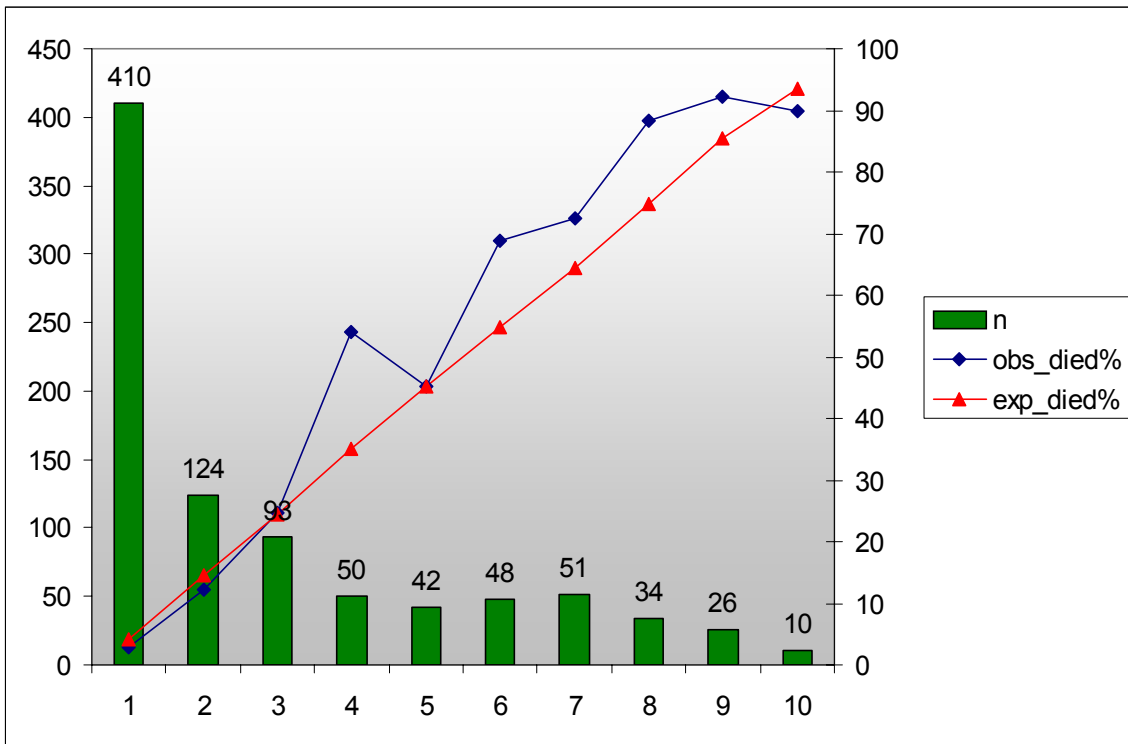

Hosmer-Lemeshow goodness-of-fit test  $\hat{C}$ : 18.69, p = 0.04

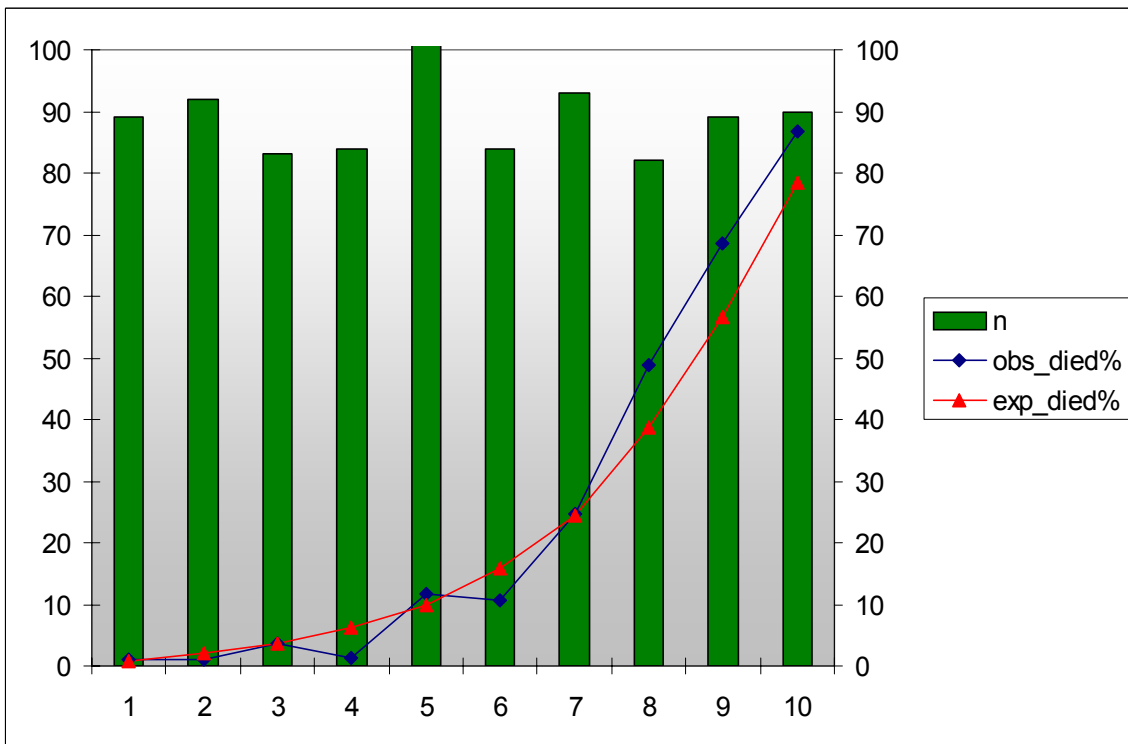

**North America (n = 731):**

aROC: 0.812

Hosmer-Lemeshow goodness-of-fit test  $\hat{H}$ : 10.57, p = 0.39

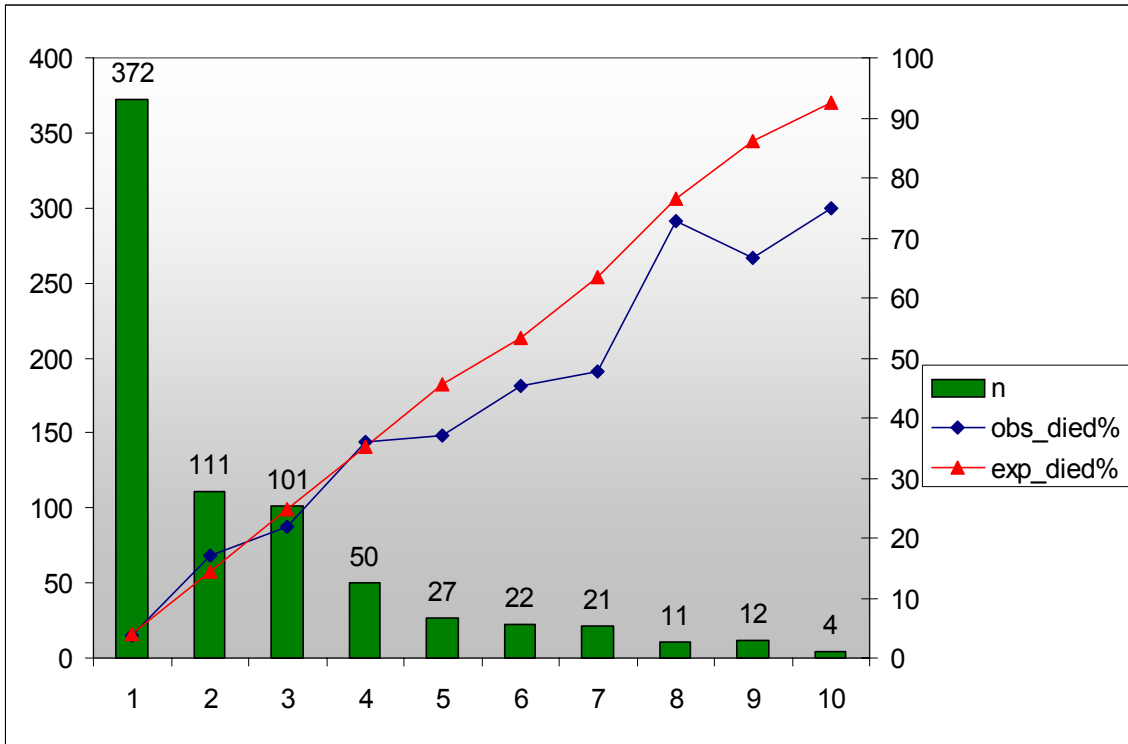

Hosmer-Lemeshow goodness-of-fit test  $\hat{C}$ : 9.63, p = 0.47

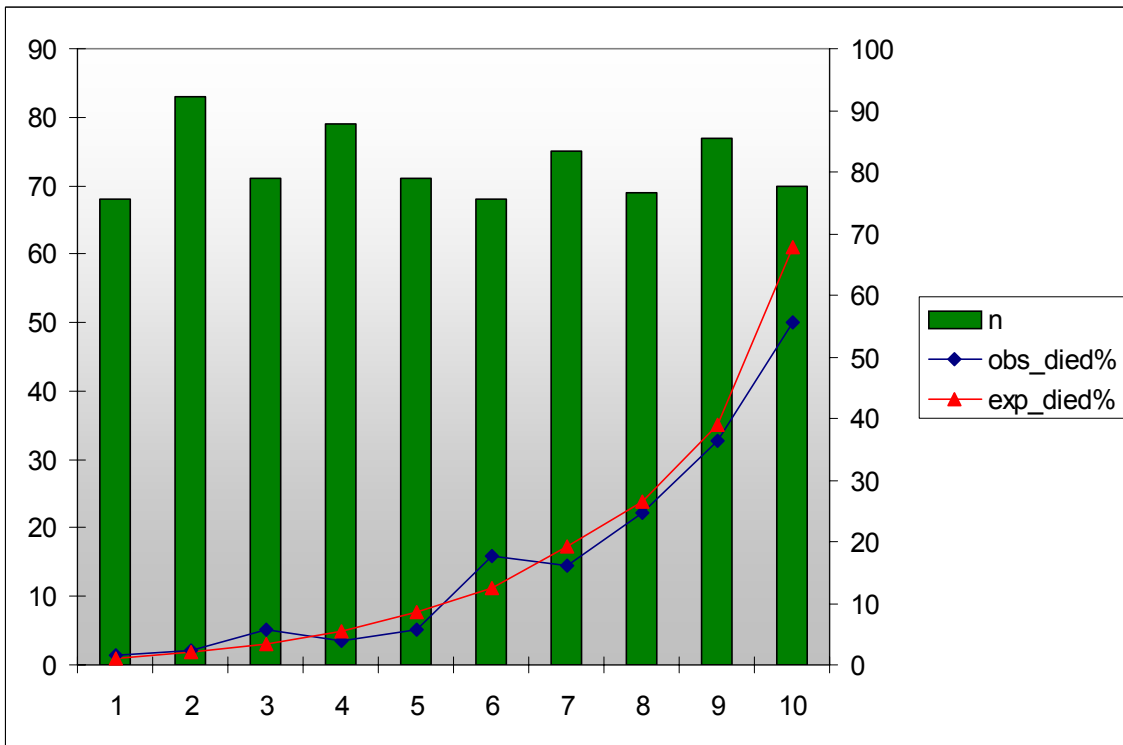

**Northern Europe (n = 339):**

aROC: 0.814

Hosmer-Lemeshow goodness-of-fit test  $\hat{H}$ : 2.44, p = 0.99

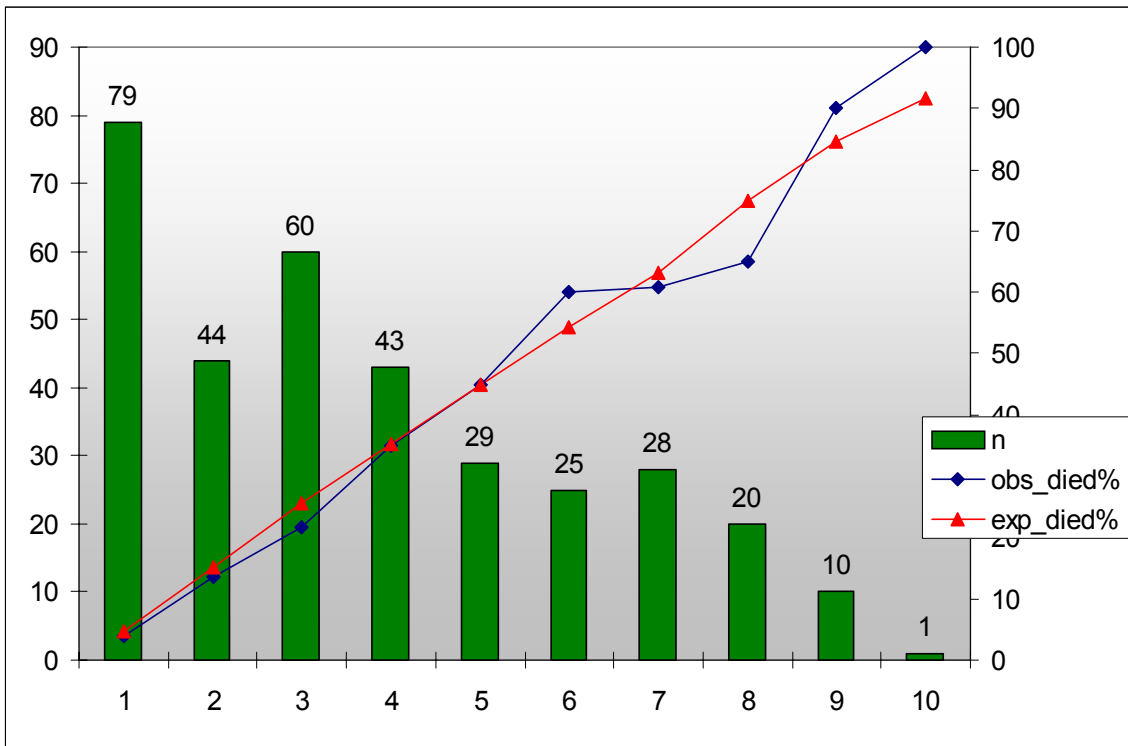

Hosmer-Lemeshow goodness-of-fit test  $\hat{C}$ : 2.34, p = 0.99

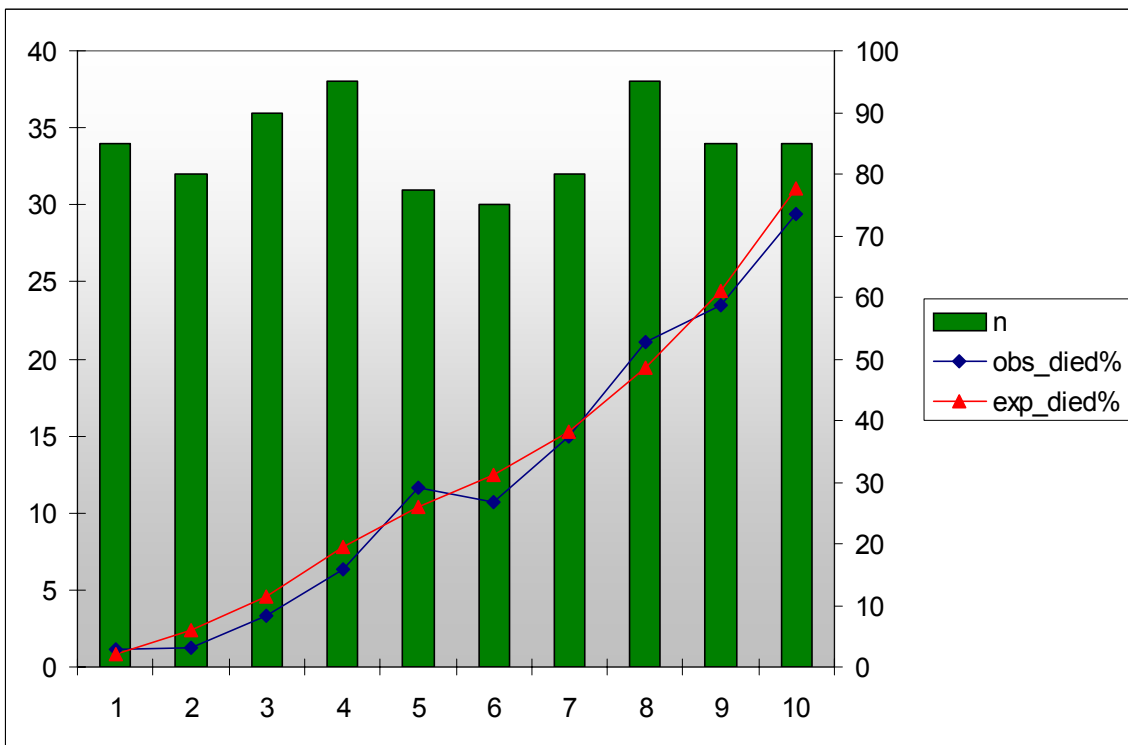

**Southern Europe and Mediterranean countries (n = 6748):**

aROC: 0.834

Hosmer-Lemeshow goodness-of-fit test  $\hat{H}$ : 14.18, p = 0.16

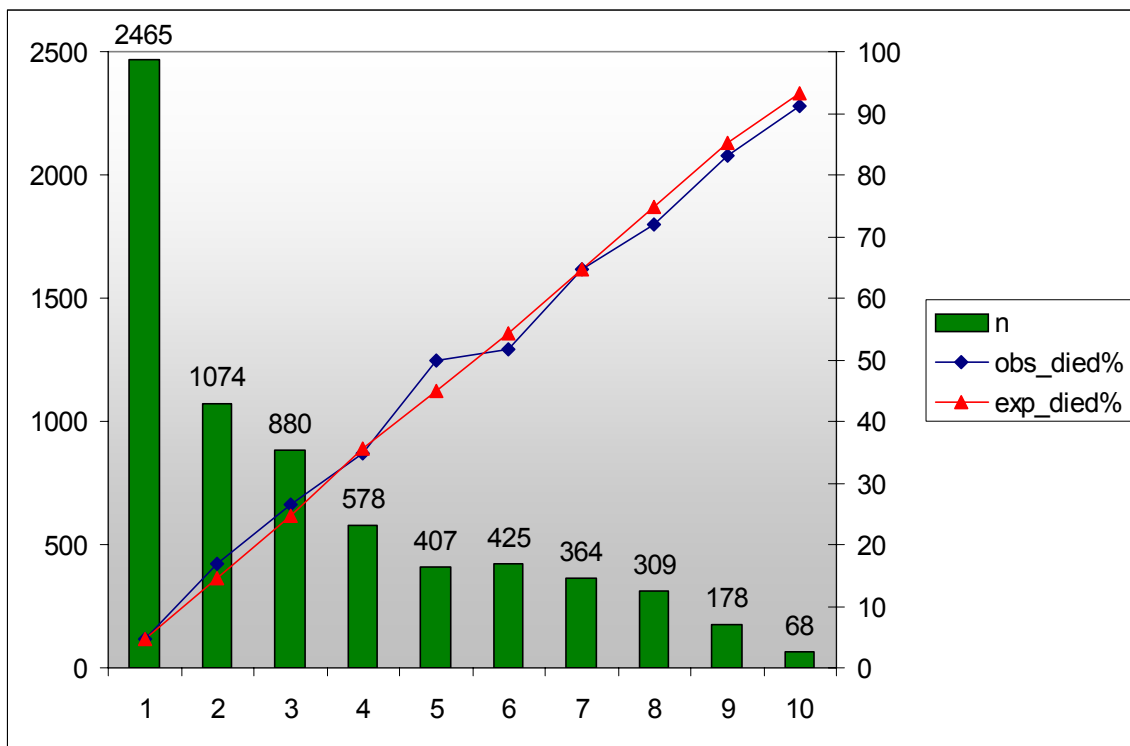

Hosmer-Lemeshow goodness-of-fit test  $\hat{C}$ : 20.78, p = 0.02

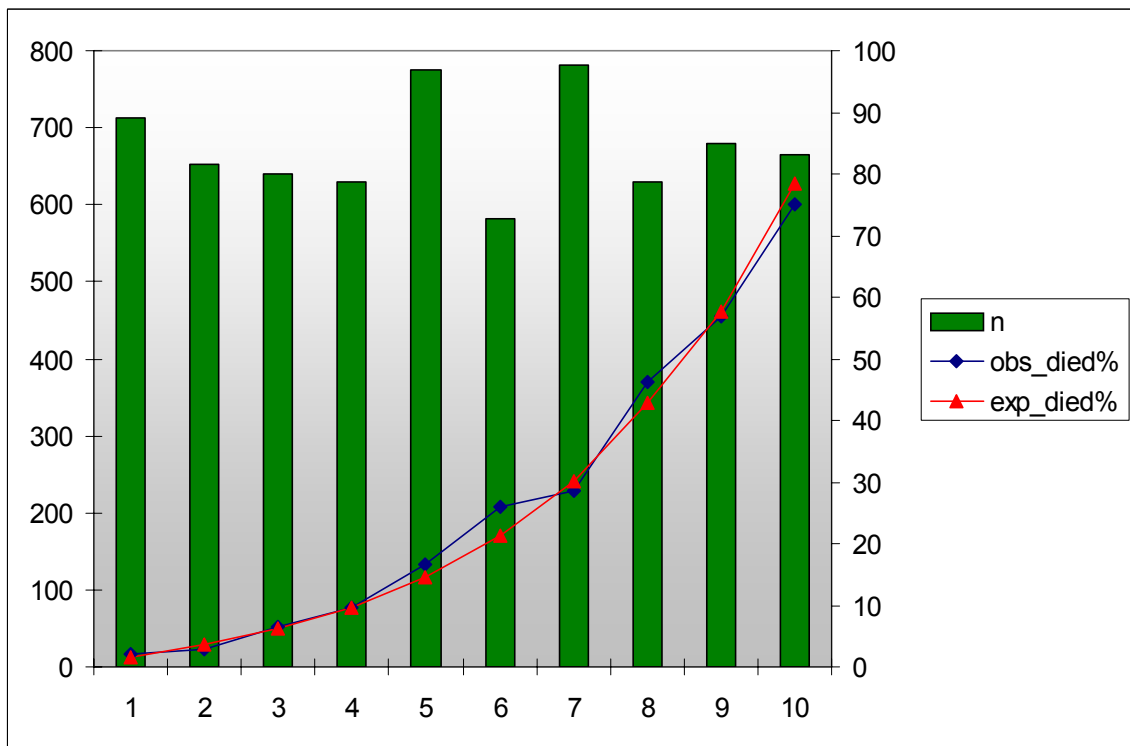

**B.2. Area under the ROC curves for the SAPS 3 for the geographic regions.**

**ROC Curve - whole dataset (n: 16.784)**

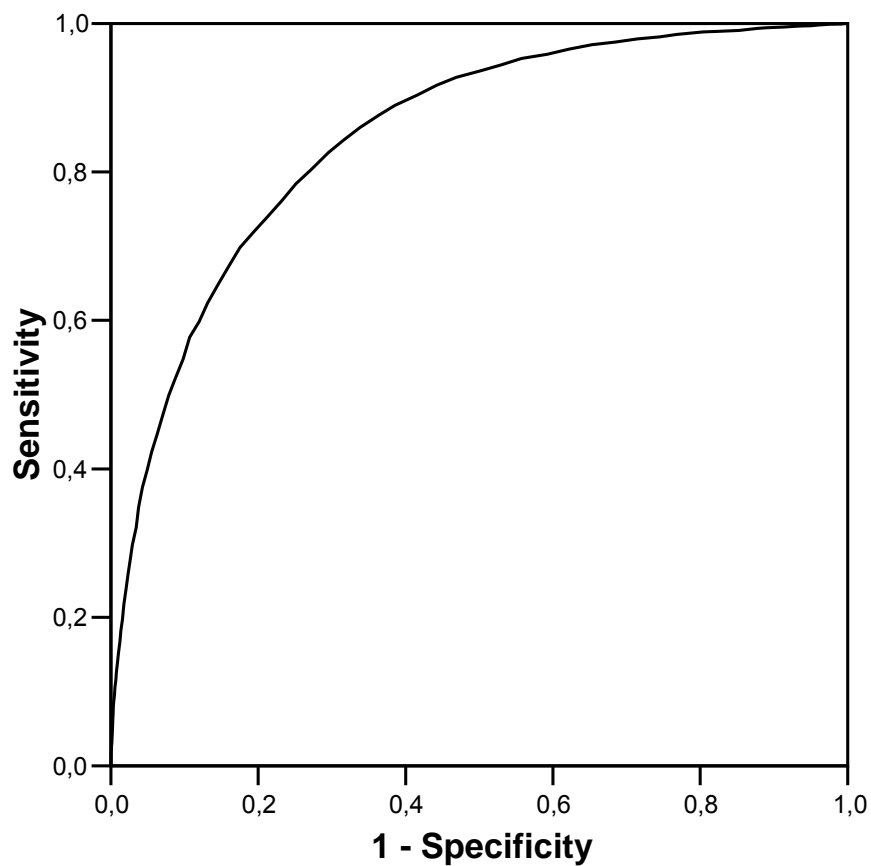

| Area  | Asymptotic 95% Confidence Interval |             |
|-------|------------------------------------|-------------|
|       | Lower Bound                        | Upper Bound |
| 0.848 | 0.841                              | 0.854       |

### ROC Curve - Australasia (n: 1.756)

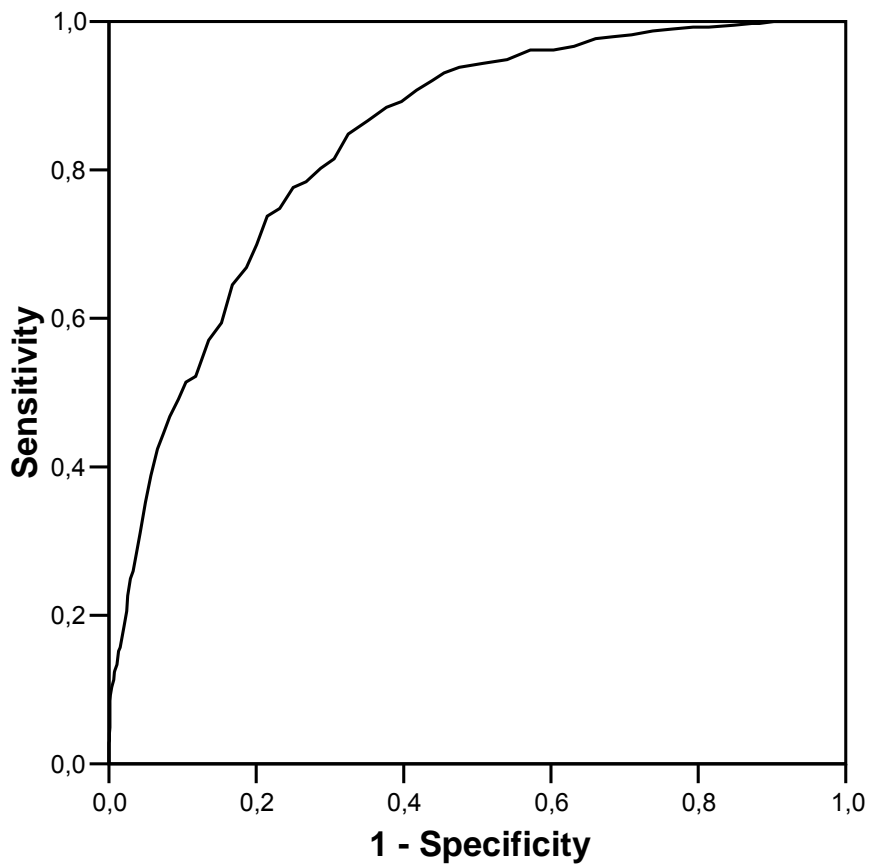

| Area  | Asymptotic 95% Confidence Interval |             |
|-------|------------------------------------|-------------|
|       | Lower Bound                        | Upper Bound |
| 0.839 | 0.818                              | 0.859       |

### ROC Curve - Central and South America (n: 2.130)

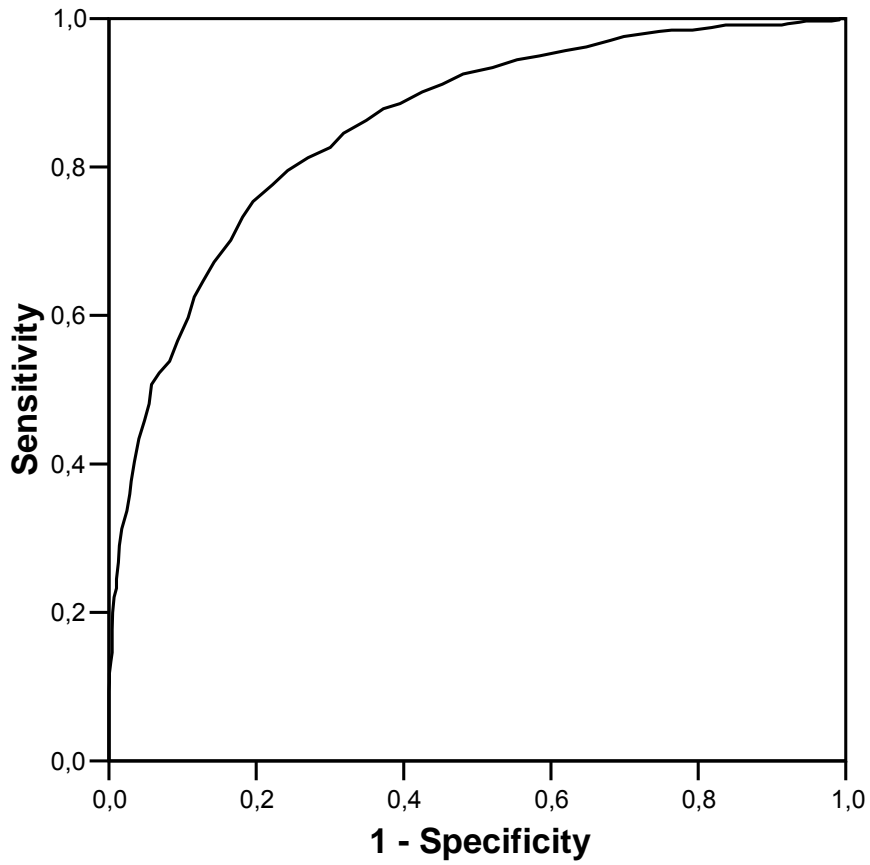

| Area  | Asymptotic 95% Confidence Interval |             |
|-------|------------------------------------|-------------|
|       | Lower Bound                        | Upper Bound |
| 0.855 | 0.837                              | 0.873       |

### ROC Curve - Central and Western Europe (n: 4.192)

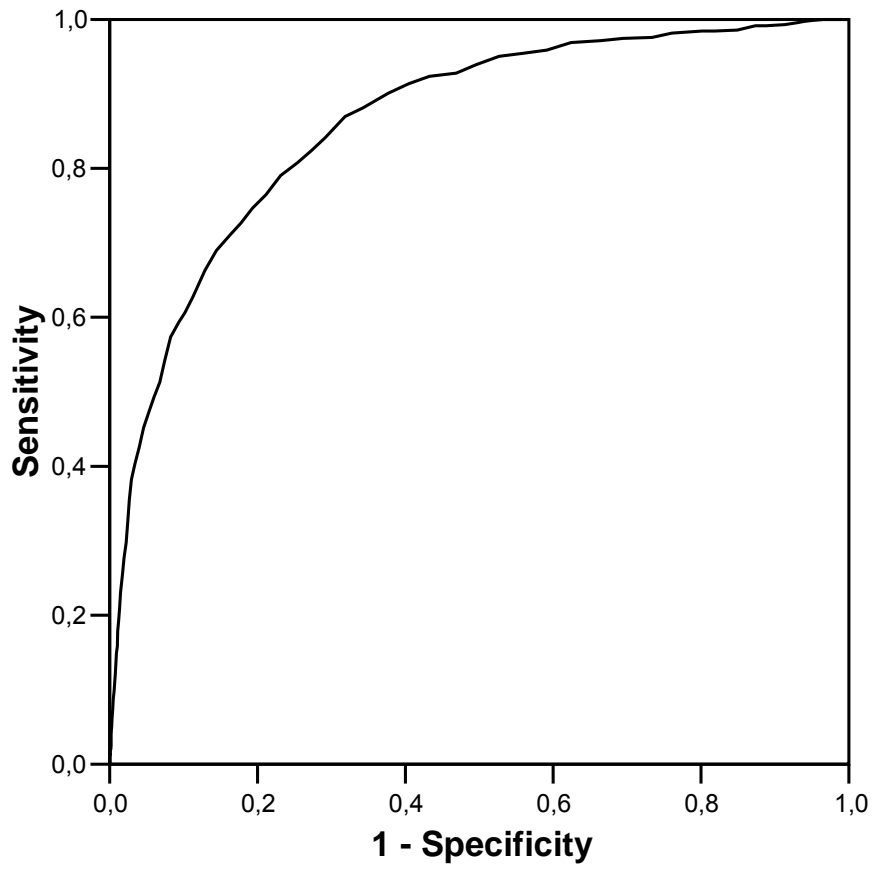

| Area  | Asymptotic 95% Confidence Interval |             |
|-------|------------------------------------|-------------|
|       | Lower Bound                        | Upper Bound |
| 0.861 | 0.846                              | 0.876       |



**ROC Curve - Eastern Europe (n:888)**

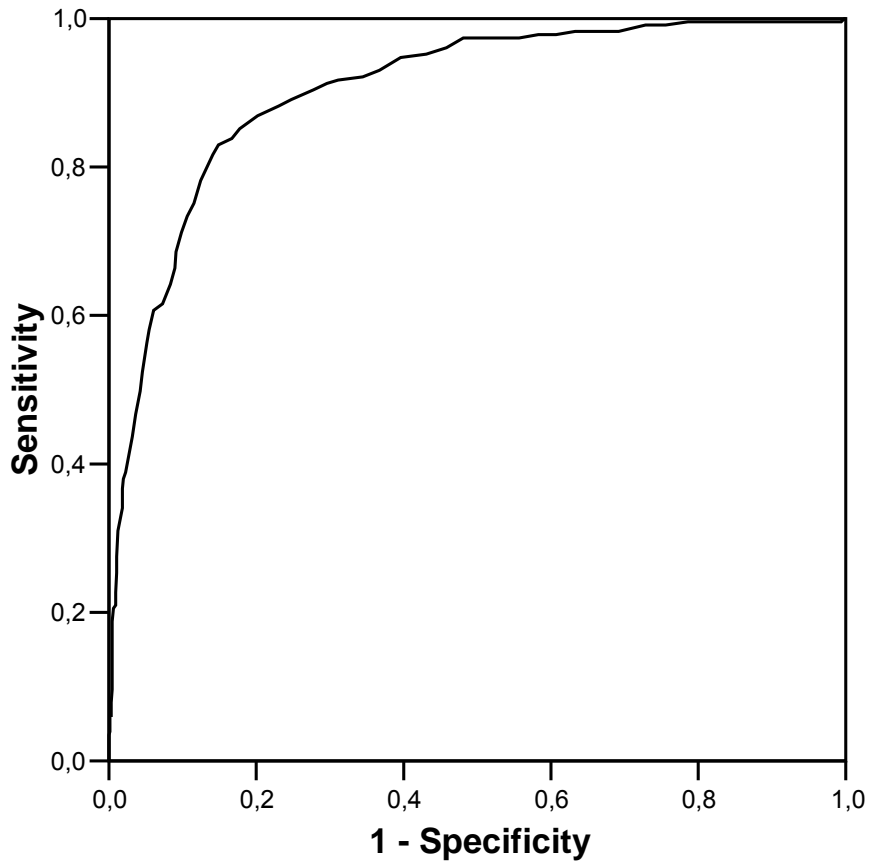

| Area  | Asymptotic 95% Confidence Interval |             |
|-------|------------------------------------|-------------|
|       | Lower Bound                        | Upper Bound |
| 0.903 | 0.881                              | 0.926       |

### ROC Curve - North America (n: 731)

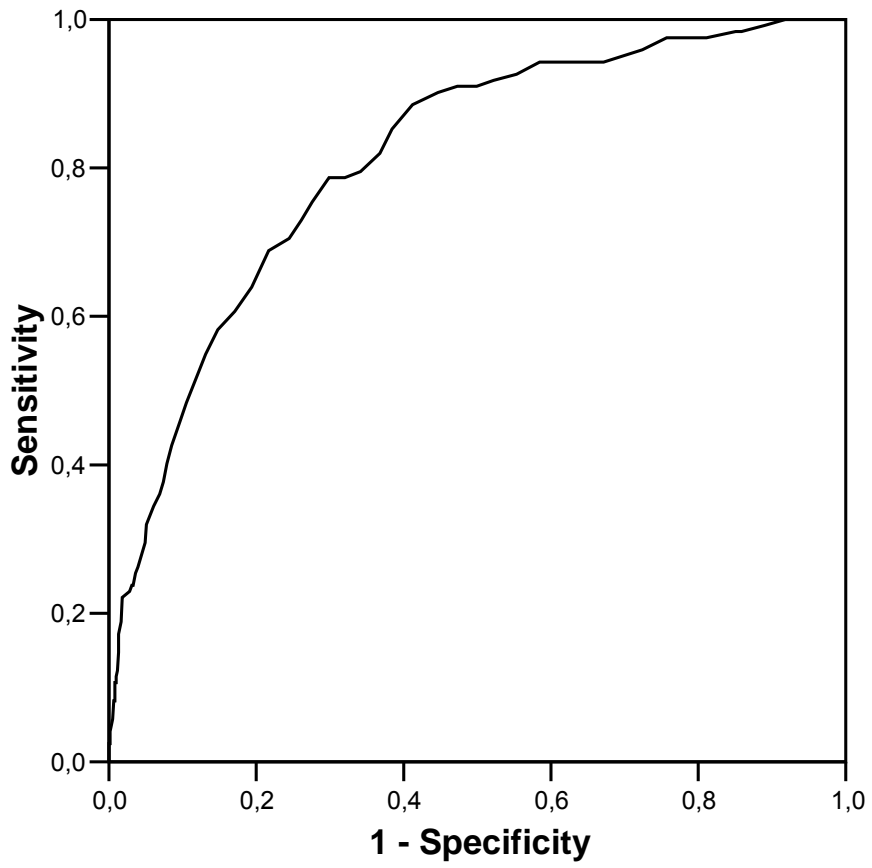

| Area  | Asymptotic 95% Confidence Interval |             |
|-------|------------------------------------|-------------|
|       | Lower Bound                        | Upper Bound |
| 0.812 | 0.772                              | 0.853       |

### ROC Curve - North of Europe (n: 339)

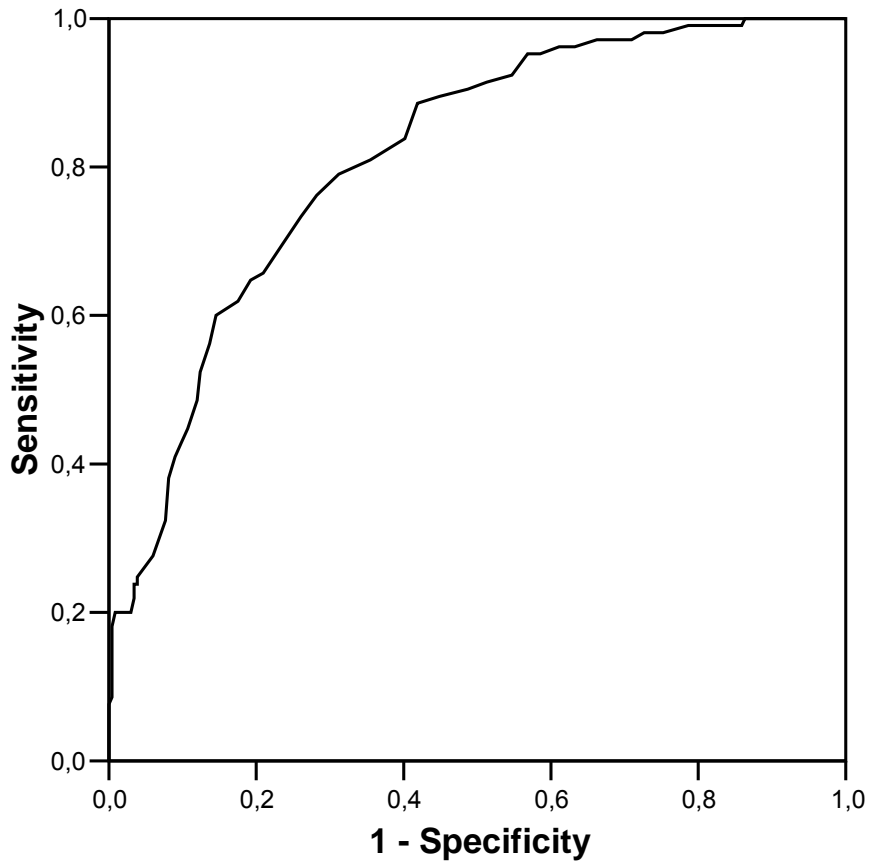

| Area  | Asymptotic 95% Confidence Interval |             |
|-------|------------------------------------|-------------|
|       | Lower Bound                        | Upper Bound |
| 0.814 | 0.767                              | 0.860       |

### ROC Curve - South of Europe and Mediterranean Countries (n: 6784)

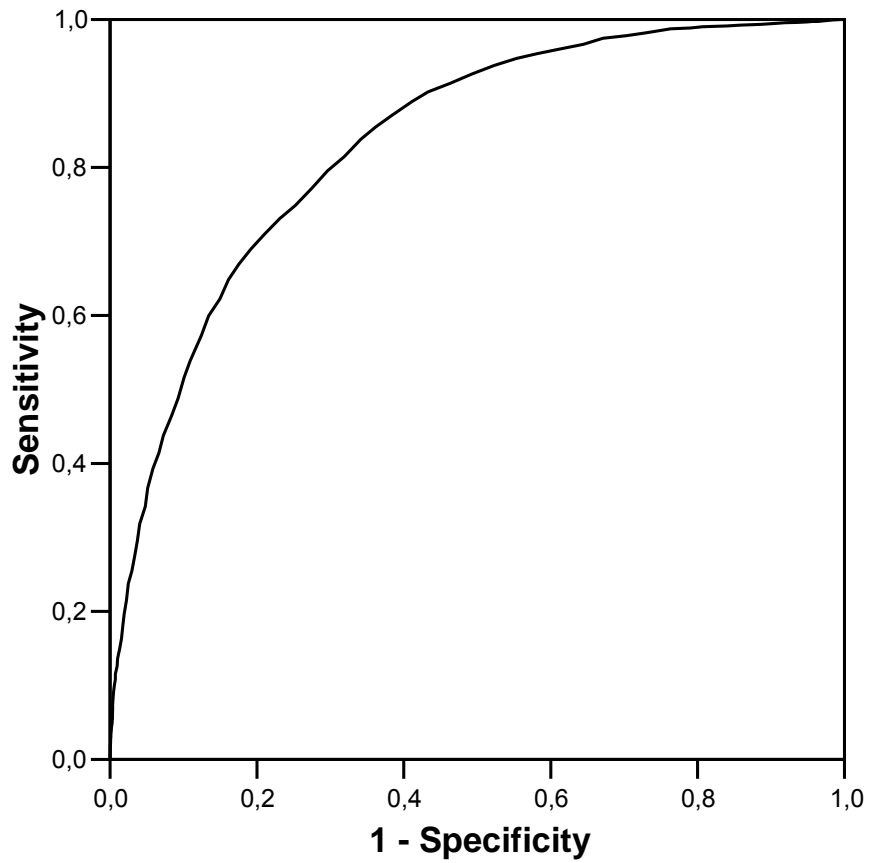

| Area  | Asymptotic 95% Confidence Interval |             |
|-------|------------------------------------|-------------|
|       | Lower Bound                        | Upper Bound |
| 0.834 | 0.823                              | 0.844       |

## Appendix C. Data definitions as used in the SAPS 3 study.

### Parameter descriptions.

**Name:**

Name of the parameter.

**Unit:**

Unit in which the parameter has to be recorded.

**Format:**

Description of the data field.

**Input:**

Input expected from the user.

**Selection:**

Type of selection

**Values:**

**Usual range:** These represent usual values in adult intensive care (although they might differ between laboratories). These values will be accepted by the system without further confirmation.

**Plausible range:** These are pathologic values, not frequently encountered in adult intensive care patients, but still plausible. These values will be accepted by the system after confirmation.

**Storage range:** Values outside the plausible range are extremely deviated values which are still stored. Values outside the storage range are normally not compatible with life and are therefore not further processed. These values will be accepted by the system after confirmation.

Attention: If you detect such an outrageous value in a patient, please record the maximal possible value (equal to the storage range). Make sure, however, that this is not due to laboratory or recording failures.

**Description:** Description of the variable.

## ACUTE INFECTION AT ICU ADMISSION - ACQUISITION

**Name:**

Acute infection at ICU admission: Acquisition

**Format:**

Number (1)

**Unit:**

**Input:**

Combo box; Single selection.

**Selection:**

Select the appropriate type of acquisition from the list:

- **Community-acquired:**

Infection present on admission to hospital or developing within 48 hours of admission. (A patient may be admitted to hospital ward for a community-acquired infection and transferred a few days later to ICU for organ failure. If the infection is the acute disease, it should be considered community-acquired at ICU entry. For example: if a patient is admitted to the ward for tuberculosis infection and transferred 5 days later for acute respiratory failure, the acute disease is a community-acquired tuberculosis).

- **Hospital-acquired:**

Infection not present on admission to the hospital and developing 48 hours or more after hospital admission or secondary to a medical/surgical (diagnostic or therapeutic) measure.

**Description:**

Describes the acquisition of an acute infection, present at ICU admission. Should only be displayed if there is an infection at ICU admission.

## ACUTE INFECTION AT ICU ADMISSION - SITE

**Name:**

Acute infection at ICU admission: Site

**Format:**

Number (3)

**Unit:**

**Input:**

Combo box; Multiple selection.

**Selection:**

Select the appropriate site from the list:

- **Neurologic:**

**Cerebral abscess:** Symptoms of a mass lesion, seizures, signs of focal deficit and / or cerebral lesion documented by CT scan or anatomical evidence. It may be treated surgically or not.

**Encephalitis:** Involvement of the brain parenchyma by infectious agent inducing neurological symptoms. It may be documented by CSF abnormalities, serology, isolation of the causal agent, CT scan.

**Meningitis:** Symptoms of meningeal syndrome with positive CSF culture or CSF abnormalities compatible with meningitis.

**Neurologic, other:** Other infections of the central nervous system

- **ORL (upper respiratory tract):**

**Sinusitis**

**Otitis**

**Other infections of the upper respiratory tract**

- **Lower respiratory tract:**

**Pneumonia:**

a. Definite pneumonia (all major clinical criteria or 2 major plus 2 minor clinical criteria plus at least one microbiological criterion):

b. Probable pneumonia: 2 major plus 1 or more minor clinical criteria

Clinical features:

Major:

- Fever or hypothermia

- Inflammatory response: WBC  $>15.10^9/L$ , C-reactive protein  $>$  twice normal

-New infiltrate on chest radiograph

Minor:

- Expectoration of purulent sputum

- Physical signs of consolidation

- Change in oxygen requirement, not explicable by other means

Microbiological features:

- Positive blood culture with a respiratory pathogen.

- Good-quality sputum (Murray and Washington criteria) with a predominant growth of a presumptive pathogen (non-ventilated patients only).

- Positive culture of a deep lung specimen from a protected bronchial lavage (quantitative culture  $10^3$  CFU/ml), transtracheal aspiration (quantitative culture equal to or greater than  $10^6$  CFU/ml) or a percutaneous lung aspirate (ventilated patient).

- Pneumococcal antigen detected in blood, sputum or urine.

- Serological diagnosis, only acceptable for the diagnosis of *Legionella*, *Mycoplasma* and *Chlamydia pneumoniae*.

**Bronchitis:** Patient has no clinical or radiographic evidence of pneumonia and has two of the following: fever (>38° C), cough, new or increased sputum production, ronchi, wheezing; AND either of the following: organism isolated from culture obtained by deep tracheal aspirate or bronchoscopy, or positive antigen test on respiratory secretions.

**Lung abscess**

**Other lower respiratory tract infections**

- **Thoracic:**

**Mediastinitis**

**Pleurisy**

**Other thoracic infections**

- **Cardiac:**

**Endocarditis:** Infection of the heart valves or of the endocardium in proximity to congenital or acquired cardiac defects documented by clinical symptoms, blood cultures and / or echocardiographic signs. It may be acute or subacute.

**Myocarditis**

**Pericarditis**

**Other**

- **Digestive:**

**Biliary tract:** Includes acute suppurative cholangitis and acute cholecystitis.

**Acute hepatitis:** Acute hepatitis due to viral or other infection.

**Liver abscess:** Acute or chronic liver abscess.

**Digestive tract:** Includes appendicitis, diverticulitis, infected colitis, ileitis.

**Peritonitis and intra-abdominal abscess:** Acute infection of the peritoneum. Can be either diffuse or collected.

**Severe diarrhoea:** Due to food poisoning - staphylococcal enterotoxin -, gastroenteritis by virus, bacteria, parasite or antibiotic-associated.

**Other infections of the digestive tract**

- **Urinary:**

**Lower urinary tract:** Vesical infection evaluated by microscopy: >50 WBC/high-powered field plus Midstream urine specimen >10<sup>5</sup> organisms/ml / Suprapubic aspirate >10<sup>3</sup> organisms/ml / Catheter specimen: pure culture of >10<sup>5</sup> organisms/ml)

**Upper urinary tract:** Includes pyelonephritis, renal and para-renal abscess.

**Prostatitis:** Acute infection of the prostate.

**Urinary, other**

- **Genital:**

Includes endometritis, salpingitis, septic abortion, postpartum infection, orchiepididymitis, urethritis.

- **Skin & Soft Tissue:**

**Skin infection**

**Soft tissue infection:** Necrotising fasciitis, infectious gangrene, necrotising cellulitis, infectious myositis, lymphadenitis, or lymphangitis.

**Decubitus ulcer infection**

**Burn infection**

**Incisional surgical wound infection**

**Deep surgical wound infection**

- **Bone & Joint:**

Includes osteomyelitis, arthritis, and intervertebral disc space infections.

- **Systemic Infection:**

Includes infections induced by infectious agents that could involve more than one organ, e.g., typhoid fever, brucellosis, yellow fever, malaria, tetanus, botulism, tuberculosis, Lyme disease, rabies.



## Electronic Supplementary Material

### - **Catheter Related:**

Positive culture of withdrawn catheter (>15 CFU by semi-quantitative technique or >10<sup>3</sup> CFU/ml by quantitative technique) and either general or local infectious symptoms, or positive blood culture with the same microorganism.

### - **Primary Bacteremia:**

Presence of viable bacteria in the blood or other organisms (virus, fungi, parasites) in the absence of any other obvious site of infection.

- **Unknown:** This could be the case of neutropenic patients who could have criteria of infection (e.g., sepsis, severe sepsis, septic shock) without any microbiologically or clinically documented infection but no other obvious explanation that could explain the symptoms.

### - **Other:**

Other infection, not specified elsewhere.

### **Description:**

Anatomical site of the infection. Several sites may be filled in but only one item by anatomical location. For each site, one to three identified microorganisms may be collected (see Acute infection at ICU admission: Agent). Should only be displayed if there is an infection at ICU admission.

## AGE

**Name:**

Patient age

**Format:**

Number (3)

**Units:**

Years of age

**Input:**

Numerical input field

**Selection:**

Enter the age of the patient (in years) at ICU admission.

**Values:**

**Usual range:** 16 - 100

**Plausible range:** 16 - 100

**Storage range:** 0 - 200

**Description:**

Age (in years) of the patient at the time of ICU admission. If no birth date is known, an estimate of age should be given.

## ANATOMICAL SITE OF SURGERY

**Name:**

Anatomical site of surgery

**Format:**

Number (3)

**Units:**

**Input:**

Combo box; Single selection.

**Selection:**

Selection from a list:

- **No surgery in the actual hospital stay.**

- **Neurosurgery.**

**Cerebrovascular accident:** neurosurgery of intracranial hematoma or other non-traumatic accident (e.g. haemorrhage, aneurysm)

**Intracranial tumour:** neurosurgery for any type of tumour, primary or secondary

**Neurosurgery, other**

**Spinal surgery**

- **Ear, nose and throat surgery**

- **Thoracic surgery.**

**Pneumonectomy**

**Lobectomy**

**Pleural surgery:** includes all surgery on pleura either for tumour or several tal-cage/abrasion for pneumothorax

**Thoracic surgery, other**

- **Heart surgery**

**Valvular, without coronary artery by-pass grafting (CABG):** all the surgical treatments of valvulopathies without coronary surgery

**Valvular with CABG:** valvular repair with coronary surgery

**CABG without valvular repair:** coronary artery by-pass grafting without valvular repair

**Heart surgery, other:** pericardial effusion, congenital anomaly, ventricular aneurysm, neoplastic disease, vena cava clipping/filter

- **Upper gastrointestinal surgery** (up to and including the jejunum)

- **Lower gastrointestinal surgery**

- **Biliary tract surgery:** surgery of gallbladder and/or biliary tract

- **Liver surgery:** partial hepatectomy, portal-systemic shunt surgery

- **Pancreas surgery**

- **Endocrine surgery:** thyroid, adrenal, pancreas surgery.

- **Obstetric surgery:** caesarean section, surgery for ectopic pregnancy, peri- or post-partum haemorrhage, intra-uterine death.

- **Gynaecological surgery:** surgery of uterus, ovaries, cervix uteri, genitalia.

- **Maxillo-facial surgery**

- **Limb surgery**

- **Vascular surgery.**

**Major aortic surgery:** includes all surgery on aorta for dissection, atheroma, aneurysm.

**Carotid endarterectomy:** includes all surgery on the carotid artery.

**Other major vascular surgery:** includes all surgery on intrathoracic or intra-abdominal vessels.

**Peripheral vascular surgery:** includes all surgery on non-intracranial, non-intrathoracic, non-intra-abdominal vessels, either arteries or veins with or without by-pass graft.

**Other vascular surgery**

- **Trauma:**

**Brain:** surgery for subdural, epidural, intracerebral haematoma or skull fracture.

**Thorax:** surgery of intrathoracic organs (either cardiac, respiratory or digestive tract) and vessels.

**Abdomen**

**Limb**

**Multiple**

- **Transplantation:**

**Liver**

**Heart**

**Kidney**

**Pancreas**

**Lung**

**Heart and lung**

**Kidney and pancreas**

**Transplantation, other**

- **Other surgical procedures:** other site of surgery, not otherwise specified.

**Description:**

The anatomical site of surgery should be indicated for patients undergoing surgery during the same hospital stay before ICU admission. Only one selection is possible. Invasive radiology procedures and definitive pacemaker insertions should not be considered surgical procedures.

## ARTERIAL OXYGEN PARTIAL PRESSURE (LOWEST)

**Name:**

Arterial oxygen partial pressure (PaO<sub>2</sub>)

**Format:**

Number (4 / 6.2)

**Unit:**

mm Hg (kPa)

**Input:**

Numerical input field

**Selection:**

Enter the value which, together with the FiO<sub>2</sub>, gives the lowest PaO<sub>2</sub>/FiO<sub>2</sub> ratio. When in doubt, enter the lowest measured value.

**Values:**

**Usual range:** 80 - 200 mm Hg (10.64 - 26.20 kPa)

**Plausible range:** 40 - 300 mm Hg (5.32 - 39.9 kPa)

**Storage range:** 0 - 900 mm Hg (0 - 119.7 kPa)

**Description:**

Oxygen partial pressure in the arterial blood, measured by blood gas analysis. This value should correspond in time to the value of the FiO<sub>2</sub> and the use of ventilatory support/mechanical ventilation.

## **BODY TEMPERATURE (HIGHEST)**

**Name:**

Body temperature (highest)

**Format:**

Number (4.1)

**Unit:**

Degrees Celsius

**Input:**

Numerical input field

**Selection:**

Enter the highest measured body temperature.

**Values:**

**Usual range:** 36.0 - 38.5° Celsius

**Plausible range:** 20 - 42° Celsius

**Storage range:** 0 - 45° Celsius

**Description:**

Measurement of highest central body temperature. If possible, confirm measurements of peripheral temperature with measurements of core temperature (nasopharyngeal, tympanic, oesophageal, rectal, pulmonary artery), especially in the case of hypothermia. If using peripheral temperature, please add 0.5° C to the peripheral temperature.

## **CANCER THERAPY**

**Name:**

Cancer therapy

**Format:**

Text

**Units:**

**Input:**

Multiple box; Single selection.

**Description:**

Measurement of highest central body temperature. If possible, confirm measurements of peripheral temperature with measurements of core temperature (nasopharyngeal, tympanic, oesophageal, rectal, pulmonary artery), especially in the case of hypothermia. If using peripheral temperature, please add 0.5° C to the peripheral temperature.

## CO-MORBIDITIES

**Name:**

Co-Morbidities

**Format:**

Text

**Units:**

**Input:**

Multiple box; Single selection.

**Selection:**

Yes/No (default) for each parameter from a list:

- **HIV positive** (no AIDS): The patient presents positive serology for HIV virus, but does not present, according to the CDC/WHO definitions, any AIDS-defining disease; CD4 cells, if measured, are usually greater than 200.
- **AIDS**: Patient meeting the CDC/WHO definitions for AIDS, such as an HIV-positive patient with clinical complications such as *Pneumocystis carinii* pneumonia, Kaposi's sarcoma, lymphoma, tuberculosis or toxoplasma infection, or CD4 cells, if measured, are usually lower than 200.
- **Steroid treatment**: Equal to or greater than 0.3 mg/kg prednisolone or an equivalent dosage of another corticosteroid, daily, in the 6 months prior to ICU admission. The exclusive use of topical steroids or steroids by inhalation is not included.
- **Radiotherapy**: In the 6 months prior to admission, externally administered radiotherapy, excluding radiotherapy for non-invasive skin tumours, enteral or parenteral radioisotope therapy, radioactive implants, radiotherapy for prevention of heterotopic bone formation.
- **Chemotherapy**: In the 6 months prior to admission, including immunosuppressing treatment for malignancy, vasculitis, rheumatoid arthritis or inflammatory bowel disease (excludes isolated treatment with steroids).
- **Immunosuppression, other**: The patient has a disease that is sufficiently advanced to suppress resistance to infection: e.g., severe malnutrition state, congenital immunohumoral or cellular immune deficiency state; excludes AIDS and HIV infection, metastatic cancer, haematological cancer, chemotherapy, radiotherapy, and treatment with steroids.
- **Metastatic cancer**: Cancer with proven distant (not regional lymph nodes) metastasis by surgery, computed tomography scan, or any other method.
  
- **Non-metastatic cancer**: cancer without proven distant (not regional lymph nodes) metastasis by surgery, computed tomography scan, or any other method.
- **Haematological cancer**: lymphoma, acute leukaemia or multiple myeloma.
- **Chronic renal failure**: chronic renal supportive therapy (either chronic haemodialysis, chronic hemofiltration or chronic peritoneal dialysis) for irreversible renal disease or history of chronic renal insufficiency at a sufficient level to provoke visceral effects.
- **Chronic pulmonary failure**: permanent shortness of breath on light activity, due to pulmonary disease (chronic restrictive or obstructive disease). Functionally, the patient is unable to work, to climb stairs or perform household duties. Should be scored also if there exists documented chronic hypoxia, hypercapnia, secondary polycythemia, severe pulmonary hypertension (>40 mmHg) or respiratory dependency.
- **COPD**: chronic obstructive pulmonary disease due to chronic bronchitis and/or emphysema.



- **Chronic heart failure, class II NYHA:** fatigue, dyspnoea or angina that appears with ordinary exertion. The patient does not present dyspnoea with the decubitus or symptoms at rest.
- **Chronic heart failure class III NYHA:** fatigue, dyspnoea or angina with a moderate level of activity (less-than-ordinary exertion).
- **Chronic heart failure class IV NYHA:** fatigue, dyspnoea or angina at rest, or at a minimum level of activity. Functionally, this patient cannot stand alone, walk slowly or dress without symptoms.
- **Cirrhosis:** documented by biopsy prior to admission/ at admission or clinical symptoms of portal hypertension: presence of oesophageal or gastric varices demonstrated by surgery, imaging or endoscopy or the demonstration of retrograde splenic-venous flow by ultrasound, history of variceal bleeding, prior episodes of hepatic failure/encephalopathy/coma.
- **Alcoholism:** alcohol intake to an extent that surpasses the social drinking custom, usually regular intake of more than 80 g of alcohol per day for at least 6 months prior to admission and responsible for clinical symptoms such as logorrhoea, encephalopathy, neurological disorders, nutritional diseases, or cirrhosis.
- **Arterial hypertension:** history of systolic blood pressure equal to or greater than 160 mm Hg and/or diastolic blood pressure equal to or greater than 95 mm Hg, treated or not treated.
- **Insulin-dependent diabetes:** patient needing daily injection(s) of insulin before ICU admission.
- **Non-insulin-dependent diabetes:** patient with prior diagnosis of diabetes mellitus, controlled with diet and/or drugs. The patient does not need daily injection(s) of insulin before ICU admission.
- **IV drug addict:** drug addiction with intravenous drugs (e.g., cocaine, opiates and derivatives) for at least 6 months prior to admission; patients who are in a methadone program, without any other drug consumption in the last 6 months, should not be considered.

**Description:**

Describes the presence or absence of specific pathological conditions, chosen from a list. The specified conditions should be present at hospital admission.

## CREATININE (HIGHEST)

**Name:**

Creatinine (highest)

**Format:**

Number (7.2 / 6.1)

**Unit:**

mg/dL (micromol/L)

**Input:**

Numerical input field

**Selection:**

Enter the highest measured creatinine value (independently from the concomitant use of extra-renal depuration techniques).

**Values:**

**Usual range:** 0.7 - 2.5 mg/dL (82.0 - 221.0 micromol/L)

**Plausible range:** 0.2 - 15.0 mg/dL (17.7 - 1326 micromol/L)

**Storage range:** 0 - 50.0 mg/dL (0 - 4420 micromol/L)

**Description:**

Laboratory measurement in the arterial or venous blood.

## **ESTIMATED GLASGOW COMA SCALE, EYE RESPONSE**

**Name:**

Estimated Glasgow coma scale: eye response

**Format:**

Number (1)

**Unit:**

Points

**Input:**

Combo box; Single selection.

**Selection:** Selection from a list. All entered values (eye, motor, verbal response) have to be from one measurement. When several measurements were recorded, please enter the one with the lowest measurement.

This GCS has to be recorded for the sedated and paralysed patients only. Record the response as it was before sedation / relaxation was started. If the proper values are unknown, please use an estimate, based on the last observations.

- ***Spontaneously***
- ***To verbal commands***
- ***To pain***
- ***None***

**Description:**

Best eye response, measured in a sedated/paralysed patient.

## ESTIMATED GLASGOW COMA SCALE, MOTOR RESPONSE

**Name:**

Estimated Glasgow coma scale: motor response

**Format:**

Number (1)

**Unit:**

Points

**Input:**

Combo box; Single selection.

**Selection:**

Selection from a list. All entered values (eye, motor, verbal response) have to be from one measurement. When several measurements were recorded, please enter the one with the lowest measurement.

This GCS has to be recorded for the sedated and paralysed patients only. Record the response as it was before sedation / relaxation was started. If the proper values are unknown, please use an estimate, based on the last observations.

- ***Obeys verbal***
- ***Localises pain***
- ***Flexion withdrawal***
- ***Flexion (decortication)***
- ***Extension (decerebration)***
- ***No response (flaccid)***

**Description:**

Best motor reaction measured in a sedated/paralysed patient.

## ESTIMATED GLASGOW COMA SCALE, VERBAL RESPONSE

**Name:**

Estimated Glasgow coma scale: verbal response

**Format:**

Number, 1

**Unit:**

Points

**Input:**

Combo box; Single selection.

**Selection:**

Selection from a list. All entered values (eye, motor, verbal response) have to be from one measurement. When several measurements were recorded, please enter the one with the lowest measurement.

This GCS has to be recorded for the sedated and paralysed patients only. Record the response as it was before sedation / relaxation was started. If the proper values are unknown, please use an estimate, based on the last observations.

- *Oriented and converses*
- *Disoriented and converses*
- *Inappropriate words*
- *Incomprehensible words*
- *No verbal response*

**Description:**

Best verbal response measured in a sedated/paralysed patient.

## **ESTIMATED GLASGOW COMA SCALE, TOTAL**

**Name:**

Estimated Glasgow Coma Scale: Total

**Format:**

Number, 1

**Unit:**

Points

**Input:**

No input required.

**Selection:**

No selection possible.

**Description:**

Sum of the three sub-scores: Estimated Glasgow Coma Scale: eye response, Estimated Glasgow Coma Scale: motor response, Estimated Glasgow Coma Scale: verbal response;

## HEART RATE (HIGHEST)

**Name:**

Heart rate: highest

**Format:**

Number (3)

**Unit:**

beats/minute

**Input:**

Numerical input field

**Selection:**

Enter the highest measured heart rate.

**Values:**

**Usual range:** 50 - 120 beats/minute

**Plausible range:** 40 - 240 beats/minute

**Storage range:** 0 - 600 beats/minute

**Description:**

In the case of patients with a distinct atrial and ventricular rate, the number corresponding to the ventricular rate should be entered.

## HOSPITAL ADMISSION - DATE AND TIME

**Name:**

Hospital admission: date and time

**Format:**

Date/time (dd.mm.yyyy / hh.mm)

**Units:**

**Input:**

Date/time input field

**Selection:**

Date/time

**Value:**

**Usual range:** 01.01.2002 / 00.00

**Plausible range:** 01.01.2002 / 00.00

**Storage range:** 01.01.1990 / 00.00

**Description:**

Date and time of hospital admission. If the patient was admitted to more than one hospital before ICU admission, use the first hospital admission as the time of hospital entry.



## HOSPITAL DISCHARGE - VITAL STATUS

**Name:**

Hospital discharge: vital status

**Format:**

Number (1)

**Units:**

**Input:**

Combo box; Single selection.

**Selection:**

Selection from the list. Enter the vital status of the patient at discharge from the hospital:

- *Alive*
- *Dead*
- *Still in the hospital*
- *Unknown*

**Description:**

Vital status at hospital discharge. Should only be recorded for patients alive at ICU discharge. If the patient has been discharged to another acute hospital, he/she should be followed and the final vital status registered.

## HYDROGEN ION CONCENTRATION (LOWEST)

**Name:**

Hydrogen ion concentration: pH (lowest)

**Format:**

Number (5.3)

**Unit:**

**Input:**

Numerical input field

**Selection:**

Enter the lowest measured pH value.

**Values:**

***Usual range:*** 7.36 - 7.44

***Plausible range:*** 6.50 - 7.70

***Storage range:*** 6.00 - 8.00

**Description:**

Laboratory measurement, either from the arterial or the venous blood.

## ICU ADMISSION - DATE AND TIME

**Name:**

ICU admission: date and time

**Format:**

Date / Time (dd.mm.yyyy / hh.mm)

**Units:**

**Input:**

Date/time input field

**Selection:**

Date / time input field

**Value:**

**Usual range:** 01.01.2002 / 00.00

**Plausible range:** 01.01.2002 / 00.00

**Storage range:** 01.01.1990 / 00.00

**Description:**

Date and time of ICU admission. The registered value should not be earlier than the value registered for hospital admission.

## ICU ADMISSION - PLANNED OR UNPLANNED

**Name:**

ICU admission: planned / unplanned

**Format:**

Number (1)

**Units:**

**Input:**

Combo box; Single selection.

**Selection:**

Selection from the list:

- **Planned:** patients whose admission was planned at least 12 hours in advance.
- **Unplanned:** patients whose admission was unplanned or planned less than 12 hours in advance.

**Description:**

Planned/unplanned status of the decision to admit a patient to the ICU.

## ICU DISCHARGE - PLANNED OR UNPLANNED

**Name:**

ICU discharge: planned / unplanned

**Format:**

Number (1)

**Units:**

**Input:**

Combo box; Single selection.

**Selection:**

Selection from the list:

- **Planned:** patients whose discharge was planned at least 12 hours in advance.
- **Unplanned:** patients whose discharge was unplanned or planned less than 12 hours in advance.

**Description:**

Planned/unplanned status of the decision to discharge the patient from the ICU. Should only be recorded for patients alive at ICU discharge.

## ICU DISCHARGE - VITAL STATUS

**Name:**

ICU discharge: vital status

**Format:**

Number (1)

**Units:**

**Input:**

Combo box; Single selection.

**Selection:**

Selection from the list. Enter the vital status of the patient at discharge from the ICU:

- ***Alive***
- ***Dead***
- ***Still in the ICU***

**Description:**

Vital status at ICU discharge.

## INSPIRATORY OXYGEN CONCENTRATION

**Name:**

Inspiratory oxygen concentration (FiO<sub>2</sub>)

**Format:**

Number (3)

**Unit:**

%

**Input:**

Numerical input field.

**Selection:**

Enter the measured inspiratory oxygen concentration, corresponding to the same arterial blood gases analysis used for the measurement of PaO<sub>2</sub>. In each case, the value that results in the lowest PaO<sub>2</sub>/FiO<sub>2</sub> ratio should be selected.

**Values:**

**Usual range:** 21 - 60 %

**Plausible range:** 21 - 100 %

**Storage range:** 10 - 100%

**Description:**

Inspiratory oxygen concentration in the inspiratory gas.

## INTRA-HOSPITAL LOCATION BEFORE ICU ADMISSION

**Name:**

Intra-hospital location before ICU admission.

**Format:**

Number (1)

**Units:**

**Input:**

Combo box; Single selection.

**Selection:**

Selection from a list:

- **Ward:** the patient was admitted to the ICU from a regular medical or surgical ward;
- **Emergency room:** the patient was admitted to the ICU from the emergency room;
- **Other ICU:** the patient was admitted to the ICU from another ICU, located on the same hospital or in another hospital;
- **Intermediate Care Unit / High-dependency Unit:** the patient was admitted to the ICU from an Intermediate Care Unit / High-dependency Unit, located in the same hospital or in another hospital;
- **Operative room:** the patient was admitted to the ICU from the operative room;
- **Recovery room:** the patient was admitted to the ICU from the recovery room or the post-anaesthesia recovery room;
- **Other:** the patient was admitted to the ICU from other locations.

**Description:**

Location from which the patient was admitted to the ICU.



## LEUKOCYTES (HIGHEST)

**Name:**

Leukocytes: highest

**Format:**

Number (8.1)

**Unit:**

G/L, Cells x 10<sup>3</sup> / mm<sup>3</sup>

**Input:**

Numerical input field

**Selection:**

Enter the highest measured WBC count. Enter the actual value, regardless of steroids, inotropes or splenectomy.

**Values:**

**Usual range:** 4.0 - 15.0 G/L

**Plausible range:** 1.0 - 40.0 G/L

**Storage range:** 0 - 999.0 G/L

**Description:**

Laboratory measurement in the arterial or venous blood.

## PLATELETS (LOWEST)

**Name:**

Platelets (lowest)

**Format:**

Number (5)

**Unit:**

Cells x  $10^3$  /  $\text{mm}^3$

**Input:**

Numeric input field

**Selection:**

Lowest measured platelet count.

**Values:**

**Usual range:** 100 - 500 cells x  $10^3$  /  $\text{mm}^3$

**Plausible range:** 0 - 1000 cells x  $10^3$  /  $\text{mm}^3$

**Storage range:** 0 - 5000 cells x  $10^3$  /  $\text{mm}^3$

**Description:**

Laboratory measurement.

## REASON(S) FOR ICU ADMISSION

**Name:**

Reason(s) for ICU admission

**Format:**

Text

**Units:**

**Input:**

Multiple box; Multiple selection.

**Selection:**

Selection from a list:

- **Basic and observational intensive care** (including preparation for scheduled surgery): the patient is in ICU for surveillance, simple weaning from ventilator after surgery, routine post-surgery care, needing complex nursing care or monitoring for drug intoxication without organ dysfunction. Generally, vital systems are well compensated and any support is at a minimal level.

- **Neurological:**

**Coma, stupor, obtunded patient, vigilance disturbances, confusion, agitation, delirium**

**Seizures**

**Focal neurologic deficit** (hemiplegia, paraplegia, tetraplegia)

**Intracranial mass effect**

**Neurological, other**

- **Cardiovascular:**

**Cardiac arrest:** Needing cardiopulmonary resuscitation (CPR) prior to admission to ICU. CPR must include chest compression, defibrillation or cardiac massage.

**Shock:** Defined by a systolic blood pressure (SBP) less than 90 mm Hg or a drop in SBP of >40 mm Hg from baseline with presence of clinical signs of peripheral circulatory insufficiency (cold, moist skin, cyanosis) and organ hypoperfusion (oliguria, encephalopathy, metabolic acidosis) or use of inotropic/vasopressor to maintain SBP at a level allowing organ perfusion (adrenaline, noradrenaline, dobutamine at any doses, dopamine >5 µg/kg.min). The shock should be classified according to the possible etiology in:

**Hypovolemic non-haemorrhagic shock** (by external fluid losses or internal sequestration)

**Hypovolemic haemorrhagic shock** (due to haemorrhage or other blood losses)

**Septic shock**

**Cardiogenic shock**

**Anaphylactic shock**

**Mixed and undefined shock**

**Chest pain** (with electrocardiographic changes compatible with either angina or acute myocardial infarction)

**Hypertensive crisis**

**Rhythm disturbances** (due to heart rate or heart conduction disturbances)

**Cardiac failure without shock** (either left, right or global)

**Cardiovascular, other**

- **Renal:**

**Pre-renal ARF:** pre-renal or functional acute renal failure induced by hypovolaemia or shock)

**Obstructive ARF:** post-renal acute renal failure: obstruction of the urinary tract or the intra-renal ducts

**Organic ARF:** acute renal failure resulting from lesions in the arteries (intra- or extra-renal), in the glomeruli, or in the interstitium

**Renal, other**

- **Respiratory:**

**ALI and ARDS:** Syndrome of acute inflammation and increased permeability associated with clinical, radiological and physiologic abnormalities: arterial hypoxemia resistant to oxygen therapy (ALI: PaO<sub>2</sub>/FiO<sub>2</sub> <300 mm Hg; ARDS: PaO<sub>2</sub>/FiO<sub>2</sub> <200 mm Hg) and diffuse bilateral radiological infiltrates without signs of cardiac failure or pulmonary capillary hypertension (pulmonary artery occlusion pressure <18 mm Hg).

**Acute respiratory failure on chronic pulmonary disease:** chronic pulmonary disease could be obstructive or restrictive.

**Respiratory, other:** Impaired respiratory function less than that defined by ALI, due to pulmonary lesion or pleuritis, necessitating oxygen or mechanical ventilation.

- **Hepatic:**

**Liver failure:** hepatic failure inducing metabolic disturbances and/or encephalopathy.

**Liver, other**

- **Haematological:**

**Haemorrhagic syndrome / disseminated intravascular coagulation:** induced by coagulation disorders like thrombocytopenia with platelet count <20,000/mL and/or increase in prothrombin time and/or congenital disorders of blood coagulation factors and/or acquired disorders of blood coagulation factors.

**Severe hemolysis**

**Haematological, other**

- **Metabolic:**

**Acid-base and/or electrolyte disturbance**

**Hypo- and hyperthermia**

**Hypo- and hyperglycemia** (includes diabetic comas)

**Metabolic, other**

- **Digestive:**

**Bleeding:** either upper or lower gastrointestinal tract

**Acute abdomen:** related to infection, ischemia, perforation, inflammation, either upper or lower gastrointestinal tract. Excludes severe pancreatitis

**Severe pancreatitis**

**Digestive, other**

- **Severe trauma**

- **Other**

**Description:**

That is(are) the reason(s) why the patient is admitted into the ICU either for monitoring or active treatment. Overall, several answers are possible, but within each organ and system only one answer is possible, and the main reason should be chosen.

If basic and observational intensive care is selected no further selection is possible.

## **SURGICAL STATUS AT ICU ADMISSION**

**Name:**

Surgical status at ICU admission

**Format:**

Number (1)

**Units:**

**Input:**

Combo box; Single selection.

**Selection:**

Selection from a list:

- **Patient not submitted to surgery:** patients not undergoing surgery before ICU admission.
- **Scheduled surgery:** patients undergoing a surgical procedure before ICU admission which was planned more than 24 hours in advance (including laparoscopic surgery).
- **Emergency surgery:** patients undergoing a surgical procedure before ICU admission, which was planned less than 24 hours in advance (including laparoscopic surgery).

**Description:**

Surgical status at admission. Only one selection possible. Invasive radiology procedures and definitive pacemaker insertions should not be considered surgical acts.

## **SYSTOLIC BLOOD PRESSURE (LOWEST)**

**Name:**

Systolic blood pressure (lowest)

**Format:**

Number (3)

**Unit:**

mm Hg

**Input:**

Numeric input field

**Selection:**

Enter the lowest measured systolic arterial blood pressure.

**Values:**

***Usual range:*** 70 - 160 mm Hg

***Plausible range:*** 0 - 200 mm Hg

***Storage range:*** 0 - 400 mm Hg

**Description:**

Measurement of systolic arterial blood pressure, invasive or non-invasive. In the case of a documented cardiac arrest during the considered period, 0 should be entered.

## TOTAL BILIRUBINE (HIGHEST)

**Name:**

Total bilirubin (highest)

**Format:**

Number (7.2)

**Unit:**

mg/dL (micromol/L)

**Input:**

Numeric input field

**Selection:**

Enter the highest measured total bilirubin value. This value is only mandatory if the patient presents clinically evident jaundice.

**Values:**

**Usual range:** 0.2 - 1.2 mg/dL (3.42 - 20.52 micromol/L)

**Plausible range:** 0.1 -50.0 mg/dL (1.71 - 855 micromol/L)

**Storage range:** 0 - 200.0 mg/dL (0 - 3420 micromol/L)

**Description:**

Laboratory measurement in the arterial or venous blood. This value is only mandatory if the patient presents clinically evident jaundice.

## USE OF MAJOR THERAPEUTIC OPTIONS BEFORE ICU ADMISSION

**Name:**

Use of major therapeutic options before ICU admission

**Format:**

Text

**Unit:**

**Input:**

Combo box; Multiple selection.

**Selection:**

The following treatment should have been provided to the patient before ICU admission. Several answers are possible, but within each item only a Yes/No answer is possible. In case no information is available about a particular item, this item should be scored as No.

Selection from a list:

- **CPR**: cardiac arrest, needing cardiopulmonary resuscitation (CPR). CPR must include chest compression, defibrillation or cardiac massage.
- **Vasoactive drugs**: vasoactive drugs are defined as dopamine equal to or greater than 5 microgram/kg/minute or any dose of dobutamine, adrenaline or noradrenaline administered intravenously in continuous perfusion for more than 1 hour prior to ICU admission.
- **Mechanical ventilation**: the patient has been subjected to invasive or non-invasive ventilation. Excluded is the use of ventilatory support alone, such as the administration of oxygen by nasal plugs or Venturi mask.

**Description:**

Describes the use of major therapeutic options before ICU admission.



## VENTILATORY SUPPORT AND MECHANICAL VENTILATION

**Name:**

Ventilatory support / mechanical ventilation

**Format:**

Number (2)

**Unit:**

**Input:**

Combo box; Single selection.

**Selection:**

Selection from a list, only one choice possible:

- **No oxygen support**

- **Oxygen support:**

**Nasal plug**

**Face or bag mask**

**Other**

- **Non-invasive ventilation:**

**CPAP/BiPAP:** Continuous positive pressure ventilation: spontaneous breathing at a pressure higher than atmospheric pressure, non-invasively delivered by a ventilator or a specifically designed apparatus to the patient by a mask

**PSV:** Pressure Support Ventilation: The ventilator assists the patient upon spontaneous effort by delivering a set level of pressure non-invasively delivered by a ventilator or a specifically designed apparatus to the patient by a mask

**Non-invasive ventilation, other**

- **Invasive ventilation:**

**CPAP:** Continuous positive pressure ventilation: spontaneous breathing at a pressure higher than atmospheric pressure, invasively delivered by a ventilator or a specifically designed apparatus to the patient by an endotracheal tube or a tracheostomy

**PSV:** Pressure Support Ventilation: The ventilator assists the patient upon spontaneous effort by delivering a set level of pressure non-invasively delivered by the ventilator to the patient by an endotracheal tube or a tracheostomy

**SIMV:** Synchronized Intermittent Mandatory Ventilation: The ventilator assists the patient by delivering a set level of volume and flow at a fixed determined respiratory rate. In between, the patient may breathe spontaneously. Ventilation is delivered by the ventilator to the patient by an endotracheal tube or a tracheostomy

**SIMV+PSV:** Synchronized Intermittent Mandatory Ventilation plus Pressure Support Ventilation: The ventilator assists the patient by delivering a set level of volume and flow at a fixed determined respiratory rate. In between, when the patient breathes spontaneously the ventilator assists the patient by delivering a set level of pressure. Ventilation is delivered by the ventilator to the patient by an endotracheal tube or a tracheostomy

**PCV:** Pressure Control Ventilation: The ventilator delivers a set level of pressure at a set, minimal rate for a set inspiratory time. Ventilation is delivered by the ventilator to the patient by an endotracheal tube or a tracheostomy

**CMV and A/CMV:** Controlled Mechanical Ventilation / Assisted / Controlled Mechanical Ventilation: The ventilator delivers a set level of volume and flow at a set, minimal rate for a set inspiratory time. Control Mechanical Ventilation: when the rate set on the ventilator is identical to the measured rate, this means that there is no spontaneous activity (i.e., during curare infusion). Assisted Mechanical Ventilation: when the rate set on the

ventilator is lower than the measured rate, this means that there is spontaneous activity and the patient triggers more breaths than the set on the ventilator. Ventilation is delivered by the ventilator to the patient by an endotracheal tube or a tracheostomy

***Invasive ventilation, other***

**Attention:** If the answer is ***Non-invasive ventilation*** or ***Invasive ventilation***, please fill in the fields "***PEEP***" and "***Tidal Volume***".

**Description:**

Type of ventilatory support / mechanical ventilation provided to the patient during the period when the blood sample used to register PaO<sub>2</sub> was taken.

## **Appendix D. Scientific Board of the SAPS 3 Project.**

### **Project coordinator:**

Rui P. Moreno, Unidade de Cuidados Intensivos Polivalente, Hospital de St. António dos Capuchos, Lisboa, Portugal.

### **Steering Committee:**

- Eduardo Almeida, Intensive Care Unit, Hospital Garcia de Orta, Pragal, Portugal.
- Ricardo Abizanda Campos, Dept. of Intensive Care, General Castello Hospital, Castello, Spain.
- David Edbrooke, Critical Care Directorate, Royal Hallamshire Hospital, Sheffield, United Kingdom.
- Gaetano Iapichino, Dept. of Anesthesia & Intensive Care Medicine, San Paolo De Rudini, Milano, Italy.
- Jean-Roger Le Gall, Dept. Réanimation Médicale, Hôpital St. Louis, Université Paris VII, Paris, France.
- Philipp G.H. Metnitz, Dept. of Anesthesiology and General Intensive Care, University Hospital of Vienna, Vienna, Austria.

### **Advisory Board:**

- Antonio Artigas, Service de Medicina Intensiva, Hospital De Sabadell, Sabadell, Spain.
- Julian Bion, University Department of Anaesthesia and Intensive Care Medicine, N5 Queen Elizabeth Hospital, Birmingham, UK.
- Jean Carlet, Réanimation Polyvalente, Fondation Hopital St Joseph, Paris, France.
- Bertrand Guidet, Réanimation Médicale, Hôpital Saint Antoine, Paris, France.
- Clare Hibbert, School of Health and Related Research (SchARR), University of Sheffield, Sheffield, UK.
- Aarno Kari, Intensium Oy, Kuopio, Finland.
- Stanley Lemeshow, Ohio State University, Biostatistics Program, Columbus, Ohio, USA.
- Ricardo Matos, Hospital de St. António dos Capuchos, Lisboa, Portugal.
- Marco Ranieri, Università di Torino, Ospedale S. Giovanni Battista, Torino, Italy.
- Charles Sprung, Hadassah Hebrew University, Jerusalem, Israel.

**Appendix E. Country coordinators of the SAPS 3 Project.**

|                    |                               |                |
|--------------------|-------------------------------|----------------|
| Argentina          | Antonio Oscar Gallesio        | Buenos Aires   |
| Australia          | Robert Herkes                 | Sydney         |
| Austria            | Herbert Vesely                | Vienna         |
| Belgium            | Didier Ledoux                 | Liege          |
| Brasil             | Eliezer Silva                 | Sao Paulo      |
|                    | Flávio Nacul                  | Rio de Janeiro |
| Canada             | John Marshall                 | Toronto        |
| Cuba               | Alfredo Sánchez Padrón        | La Habana      |
| Czech Republic     | Vladimir Cerny                | Hradec Kralove |
| Denmark            | Jens Strom                    | Glostrup       |
| Finland            | Minna Niskanen                | Kuopio         |
| France             | Jean-François Timsit          | Paris          |
| Germany            | Konrad Reinhart               | Jena           |
|                    | Frank Brunkhorst              | Jena           |
| Greece             | Dimitros Matamis              | Thessaloniki   |
| Hong Kong          | Charles Gomersall             |                |
| Hungary            | Akos Csomos                   | Eger           |
| India              | Shirish Prayag                | Pune           |
| Ireland            | Thomas Ryan                   | Dublin         |
| Israel             | Charles Sprung                | Jerusalem      |
| Italy              | Maurizia Capuzzo              | Ferrara        |
| Luxembourg         | Margareth Hemmer              | Luxembourg     |
| Mexico             | Guillermo Dominguez           | Morelia        |
|                    | Cherit Abel Maldonado Ortiz   | Michoacan      |
| Netherlands        | Rob Bosman                    | Amsterdam      |
| Norway             | Hans Flaatten                 | Bergen         |
| Portugal           | Ricardo Matos                 | Lisboa         |
|                    | Paulo Maia                    | Porto          |
| Russian Federation | Igor Borisovitch Zabolotskikh | Krasnodar      |
| South Africa       | Sats Bhagwanjee               | Johannesburg   |
| Spain              | Miquel Nolla                  | Barcelona      |
| Sweden             | Stefan Lundi                  | Göteborg       |
| Switzerland        | Jacques-André Romand          | Geneva         |
| Turkey             | Figen Esen                    | Istanbul       |

Electronic Supplementary Material

United Kingdom

Saxon Ridley

Norwich

United States of America

Thomas Higgins

Springfield

Venezuela

José Besso

Caracas

## Appendix F. List of participating ICUs and their respective coordinators

| <b>Coordinator</b>             | <b>Icu</b>                                       | <b>Department</b>                       | <b>Hospital</b>                                                         | <b>City</b>                 | <b>Country</b>         |
|--------------------------------|--------------------------------------------------|-----------------------------------------|-------------------------------------------------------------------------|-----------------------------|------------------------|
| Margarita Torres Boden         | Unidad de Terapia Intensiva                      | Departamento de Urgencias               | Hospital Geral de Agudos Cosme Argerich                                 | 1609 Buenos Aires           | Argentina              |
| Claudio Bertone                | Unidad de Terapia Intensiva                      | Medicina Interna                        | Hospital Provincial del Centenario                                      | 2000 Rosario, Santa Fe      | Argentina              |
| Jorge de Castro                | Servicio de Terapia Intensiva                    |                                         | Hospital Ramon Santamarina de Tandil                                    | Tandil (7000)               | Argentina              |
| Delgado Miguel Angel           | ICU                                              |                                         | Clínica Roca S.A.                                                       | Río Negro                   | Argentina              |
| Carlos Castarataro             | Servicio de Terapia Intensiva Adultos            | Departamento de Medicina                | Hospital Italiano de Buenos Aires                                       | Buenos Aires                | Argentina              |
| Cristian Becerra               | Unidad Terapia Intensiva Clinica Privada Caraffa | Departamento de Cuidados Intensivos     | Clinica Privada Caraffa                                                 | Cordoba                     | Argentina              |
| Maximiliano Waschbusch         | Unidad de Terapia Intensiva (UTI)                |                                         | Hospital de Monte Grande                                                | Buenos Aires                | Argentina              |
| Lilinan Monica Vetere          | Servicio de Cuidados Intensivos                  |                                         | Hospital Escuela "U.A.I."                                               | Buenos Aires                | Argentina              |
| Ricardo Valentini              | Unidad de Terapia Intensiva de CEMIC             | Departamento de Medicina                | Centro de Educacion Medica e Investigaciones Clinicas "Norberto Quirno" | Buenos Aires                | Argentina              |
| Armando Delgado Camilo Velluso |                                                  | Emergencias Medicas                     | Instituto del Corazon Hospital Bernardino Rivadavia                     | 5300nBuenos Aires           | Argentina<br>Argentina |
| Rosa Reina                     | Servicio de Terapia Intensiva Clinico Quirurgica |                                         | San Martin de La Plata                                                  | La Plata                    | Argentina              |
| Cristina Santos                | Adults Intensive Care Unit                       |                                         | Hospital Interzonal de Agudos Eva Perón (Catex)                         | San Martín                  | Argentina              |
| Robert Herkes                  | Intensive Care Services                          | Intensive Care                          | Royal Prince Alfred Hospital                                            | Camperdown NSW 2111         | Australia              |
| Jonathon Foote                 | Intensive Care Unit                              |                                         | The Queen Elizabeth Hospital                                            | SA 5011 Woodville           | Australia              |
| Tamara Hunt                    | Critical Care Unit                               |                                         | Flinders Medical Centre                                                 | SA 5042                     | Australia              |
| Peter Bristow                  | Critical Care Ward                               | Intensive Care Dep.                     | Toowoomba Hospital                                                      | Toowoomba, 4350, Queensland | Australia              |
| John Santamaria                | ICU                                              |                                         | St. Vincent Hospital                                                    | Melbourne                   | Australia              |
| Herbert Vesely                 | Anästhesiologische Intensivstation               | Abt. für Anästhesie und Intensivmedizin | Hanusch Krankenhaus                                                     | 1140 Wien                   | Austria                |
| Thomas Publig                  | Interne Intensiv                                 | IV. Medizinische Abteilung              | KH der Stadt Wien Lainz                                                 | 1130 Wien                   | Austria                |
| Georg Halvax                   | Interdisziplinäre Intensiv-                      | Abt. für Anästhesie und Inten-          | A. ö. KH der Barmh. Brüder                                              | 9300 St. Veit / Glan        | Austria                |

## Electronic Supplementary Material

|                     |                                       |                                                 |                                                |                                  |         |
|---------------------|---------------------------------------|-------------------------------------------------|------------------------------------------------|----------------------------------|---------|
| Felix Ernst         | station<br>Abt. 6, Internistische ICU | sivmedizin<br>I. Medizinische Abteilung         | St. Veit<br>A. ö. KH Mistelbach                | 2130 Mistelbach                  | Austria |
| Franz Schwameis     | Intensivbetreuung (Anästhesie)        | Abt. für Anästhesie und Intensivmedizin         | A. ö. KH Baden                                 | 2500 Baden                       | Austria |
| Andreas Lerche      | Anästhesiologische Intensivstation    | Abt. für Anästhesie und Intensivmedizin         | Sozialmedizinisches Zentrum Floridsdorf        | 1210 Wien                        | Austria |
| Barbara Hörnlein    | Interne Intensiv                      | III. Medizinische Abteilung                     | KH der Stadt Wien Lainz                        | 1130 Wien                        | Austria |
| Stephan Hornykewycz | Anästh. Intensiv 13B2                 | Univ. Klinik für Anästhesie und Intensivmedizin | AKH Wien Universitätskliniken                  | 1090 Wien                        | Austria |
| Philipp Metnitz     | Chir. Intensiv 9D                     | Univ. Klinik für Chirurgie - Abt. Transplant    | AKH Wien Universitätskliniken                  | 1090 Wien                        | Austria |
| Dieter Linemayr     | Allgemeine Intensivstation            | Anästhesie                                      | A. ö. Landes KH Mödling                        | 2340 Mödling                     | Austria |
| Kurt Lenz           | Interne Intensiv                      | Interne Abteilung                               | A. ö. KH der Barmherzigen Brüder Linz          | 4014 Linz                        | Austria |
| Nikolaus Gaberszig  | Anaesthesiologische Intensivstation   | Abteilung für Anästhesie und Intensivmedizin    | A.ö. KH Wiener Neustadt                        | 2700 Wiener Neustadt             | Austria |
| Gabriele Sprinzi    | IMCU                                  | Abt. für Anästhesie und Intensivmedizin         | A.ö. LKH Tulln                                 | 3430 Tulln                       | Austria |
| Dietmar Krucher     | Anästhesiologische Intensivstation    | Abt. für Anästhesie und Intensivmedizin         | A.ö. KH St. Pölten                             | A-3100 St. Poelten               | Austria |
| Andreas Valentin    | Interne Intensiv 12 A                 | 2. Med. Abt.                                    | Rudolfstiftung                                 | A-1030 Wien                      | Austria |
| Gabriele Michitsch  | Interne Intensiv                      | III Med. Pav. 29                                | Wilhelminenspital                              | 1160 Wien                        | Austria |
| Werner Veegh        | HUST                                  | Internal Medicine Dep.                          | SMZ - Floridsdorf                              | 1210 Wien                        | Austria |
| Manu Malbrain       | Medical Intensive Care Unit           | Medical Intensive Care Unit                     | ACZA Campus Stuivenberg                        | B-2060 Antwerpen 6               | Belgium |
| Philippe Michel     | G4                                    | Intensive Care                                  | CHP Tourelle                                   | 4800 Verviers                    | Belgium |
| Marc Bohyn          |                                       | Intensive Care                                  | Clinique St Etienne                            | 1210 Brussels                    | Belgium |
| Marc Simon          | Service de Soins Intensifs            | Anesthésie-Réanimation                          | Cliniques du Sud-Luxembourg, Hôpital St-Joseph | 6700 Arlon                       | Belgium |
| Alain De Meulder    | Soins Intensifs                       | Soins Intensifs                                 | Clinique Sainte Elisabeth                      | B-5000 Namur                     | Belgium |
| Didier Ledoux       | General Intensive Care Unit           | Dpt of Anaesthesia and Critical Care Medicine   | University Hospital of Liege                   | B-4000 Liege                     | Belgium |
| Collin Vincent      | Soins Intensifs                       | Médecine Interne                                | Clinique Europe - Site St Michel               | 1040 Bruxelles                   | Belgium |
| Walter Swinnen      | Surgical ICU                          | ICU                                             | AZ Sint-Blasius                                | 9200 Dendermonde                 | Belgium |
| Jacques Devriendt   | Medical Intensive Care Unit           | Internal Medicine                               | CHU Brugmann                                   | 1020 Brussels                    | Belgium |
| José Rodolfo Rocco  | Medical Surgical Combined             | Intensive Care Medicine                         | Hospital Universitário - UFRJ                  | Rio de Janeiro, RJ CEP 21941-590 | Brazil  |
| Márcio Soares       | Medical Surgical ICU                  | Critical Care Medicine                          | Instituto Nacional de Cancer - INCA            | Rio de Janeiro, RJ 20-230-130    | Brazil  |

Electronic Supplementary Material

|                                       |                                  |                                |                                              |                                             |        |
|---------------------------------------|----------------------------------|--------------------------------|----------------------------------------------|---------------------------------------------|--------|
| Elcio Tarkieltaub                     | UTI - Adulto                     |                                | Hospital Mun. Prof. Alípio Corrêa Neto       | 03807-230 São Paulo - SP                    | Brazil |
| Rosa Maria Sannuti                    | UTI - Adulto                     |                                | Hospital Mun. José de Carvalho Florence      | S. José dos Campos - SP                     | Brazil |
| Sylvio M. A. Gandra                   | UTI - Adulto                     |                                | Hospital Samaritano                          | São Paulo - SP                              | Brazil |
| João Geraldo Simões                   | UTI - Adulto                     |                                | Hospital Santa Paula                         | São Paulo - SP                              | Brazil |
| Houly                                 |                                  |                                |                                              |                                             |        |
| Eliézer Silva                         |                                  |                                | Hospital Geral do Grajaú (Univ. Santo Amaro) | S. Paulo                                    | Brazil |
| Flávio Eduardo Nácul                  | Medical/Surgical                 | ICU                            | Clínica São Vicente                          | Gávea - CEP 22451-100, Rio de Janeiro, RJ   | Brazil |
| Eliézer Silva                         | UTI A                            |                                | Hospital Israelita Albert Einstein (HIAE)    | São Paulo, SP CEP: 05651- 901               | Brazil |
| Joel de Andrade                       | UTI                              |                                | Hospital Universidade Federal Santa Catarina | Florianópolis, SC CEP:88040-970             | Brazil |
| Milton Caldeira Filho                 |                                  |                                | Hospital Dona Helena                         | Joinville                                   | Brazil |
| Nilton Brandão Silva                  | Medical Surgical Combined        | Intensive Care Medicine        | Hospital Moinhos de Vento de Porto Alegre    | Porto Alegre CEP 90035-001                  | Brazil |
| Marcelo G. Rocha                      | UTI Pavilhao Pereira Filho       |                                | Santa Casa de Porto Alegre                   | Porto Alegre 90020-090 RS                   | Brazil |
| Humberto Carlos Martins Fadiga Junior | Unidade de Cuidados Neurológicos |                                | Hospital Santa Catarina                      | Sao Paulo, CEP: 01310-000                   | Brazil |
| Heitor Póvoas                         | Adult ICU                        | Critical Care                  | Hospital da Cidade                           | Salvador BA 40323-010                       | Brazil |
| Humberto Carlos Martins Fadiga Junior | UTI neurologica Bloco IV         |                                | Hospital de Beneficencia Portuguesa          | Sao Paulo, CEP: 01323-001                   | Brazil |
| Paulo Cesar P. Souza                  | ICU                              |                                | Hospital de Clínicas Mário Lioni             | Rio de Janeiro, CEP 20520 200               | Brazil |
| Anselmo Dornas Moura                  | UTI Adulto                       | CTI/UCO                        | Mater Dei S.A.                               | CEP: 30190.131 Belo Horizonte, Minas Gerais | Brazil |
| José Albani de Carvalho Jr            | UTI Adult                        | Serviço de cuidados intensivos | Hospital Estadual Vila Alpina                | S. Paulo                                    | Brazil |
| José Albani de Carvalho Jr            | Adult medical-surgical           | Dep. Cuidados Intensivos       | Hospital Geral de Itapecerica da Serra       | Itapecerica da Serra, S. Paulo              | Brazil |
| José Mário Teles                      | General ICU                      |                                | Hospital Português                           | Salvador - BA                               | Brazil |
| Heitor João Lagos                     |                                  |                                | Hospital Nossa Senhora das Graças            | Curitiba PR                                 | Brazil |
| José Mário Teles                      | Surgical ICU                     |                                | Hospital de Santa Izabel                     | Salvador BA                                 | Brazil |
| Flávio Nacul                          |                                  |                                | Hospital do Amparo Feminino                  | Rio de Janeiro                              | Brazil |
| Paulo Cesar P. Souza                  | UCI                              |                                | Hospital das Clínicas de Niterói             | Niterói, Rio de Janeiro                     | Brazil |
| Flávio Eduardo Nacul                  | Medical/Surgical Combined        | Intensive Care Unit            | Hospital Barra d'Or                          | Barra da Tijuca, Rio de                     | Brazil |



## Electronic Supplementary Material

|                        |                                            |                                            |                                                                    |                                  |                |
|------------------------|--------------------------------------------|--------------------------------------------|--------------------------------------------------------------------|----------------------------------|----------------|
| Marcos Knibel          | Combined ICU                               |                                            | Hospital CardioTrauma Ipanema                                      | Janeiro<br>Rio de Janeiro        | Brazil         |
| Álvaro Réa-Neto        | UTI-adulto do Hospital de Clínicas da UFPR | Departamento de Clínica Médica             | Hospital de Clínicas da Universidade Federal do Paraná             | 80060-900 Curitiba - PR          | Brazil         |
| Diana Grigorova        | Surgical Intensive Care Unit               | Anaesthesia and Intensive Care Unit        | Alexandrovska University Hospital                                  | 1431 Sofia                       | Bulgaria       |
| Denny P. Laporta       |                                            | Department of Adult Critical Care          | Sir Mortimer B Davis Jewish General Hospital and McGill University | Montreal, Québec, Canada H3T 1E2 | Canada         |
| Richard Hall           | Medical, Surgical and Neurosurgical        | Critical Care Services                     | Capital Health - Queen Elizabeth II Health Sciences Centre         | Halifax, Nova Scotia B3H 3A7     | Canada         |
| Richard Hall           | Medical and Surgical                       | Critical Care Services                     | Capital Health - Queen Elizabeth II Health Sciences Centre         | Halifax, Nova Scotia B3H 3A7     | Canada         |
| Alfredo Sánchez Padrón | ICU                                        | ICU Department                             | Hospital Universitario "Faustino Pérez"                            | Matanzas                         | Cuba           |
| Jiri Valenta           | General ICU                                | Dep. Anaesthesia and Resuscitation         | University Teaching Hospital, Charles University                   | Praha 2, 12800                   | Czech Republic |
| Lukas Dadak            | General ICU                                | Dept. of Anesthesiology - Int. Care        | St. Anne's University Hospital Brno                                | 656 91 Brno                      | Czech Republic |
| Jakub Raimr            | Critical Care                              | Clinic of Anesthesiology and Resuscitation | University Hospital Olomouc                                        | Olomouc 77520                    | Czech Republic |
| Vladimír Cerný         |                                            | Dept. of Anesthesiology                    | Fakultní nemocnice                                                 | 500 05 Hradec Králové            | Czech Republic |
| Petr Hon               | Neuro ICU                                  | Dpt of Neurology                           | University Hospital Ostrava                                        | 708 52 Ostrava - Poruba          | Czech Republic |
| Jan Pachtl             | General Intensive Care Unit                | Dept. of Anesthesiology and CCM            | University Hospital Královské Vinohrady                            | 100 34 Praha                     | Czech Republic |
| Eduard Kasal           | Interdisciplinary ICU                      | Dept. of Anesthesiology                    | University Hospital                                                | 304 60 Plzen                     | Czech Republic |
| Radek Splechtna        | General ICU                                | Dept. of Anesthesiology                    | Masarykova nemocnice Hospital                                      | 401 13 Ústí nad Labem            | Czech Republic |
| Karel Cvachovec        | N° 1                                       | Dept. of Anesthesiology                    | University Hospital Motol                                          | 150 06 Praha 5                   | Czech Republic |
| Ladislav Blahut        | Surgical                                   | Central Surgical Intensive Care Unit       | University Hospital Olomouc                                        | 775 20 Olomouc                   | Czech Republic |
| Daniel Prchal          | surgical and medical                       | ARO                                        | General Hospital Usti nad Orlici                                   | 562 18 Usti nad Orlici           | Czech Republic |
| Marian Barta           | ARO                                        | Anesthesia and resuscitation care          | Nemocnice Trinec                                                   | Kastanova 268                    | Czech Republic |
| Martin Dolecek         | ARO                                        | Anaesthesia Dept.                          | Research Institut for Traumatology and Special Surgery             | 662 50 Brno                      | Czech Republic |

## Electronic Supplementary Material

|                         |                                   |                                                  |                                             |                          |                |
|-------------------------|-----------------------------------|--------------------------------------------------|---------------------------------------------|--------------------------|----------------|
| Vladimir Sime           | odd. ARO                          |                                                  | Nemocnice s poliklinikou<br>Most            | Purky 270 434 64 Most    | Czech Republic |
| Magdalena Fortová       | ARO                               | Dept. of anesthesiology                          | Nemocnice                                   | 532 03 Pardubice         | Czech Republic |
| Ludovít Petřík          | ARO                               | Dep. of anesthesia and resuscit.                 | Vítkovická nemocnice BMA a.s.               | 703 84 Ostrava-Vítkovice | Czech Republic |
| Martin Metelka          | ICU                               | Dept. of Anesth.                                 | Okresní nemocnice Vsetín                    | 755 32 Vsetín            | Czech Republic |
| Martin Fajt             | Intensive Care Unit               | Pediatric dep.                                   | Thomayer's Teaching Hospital                | Praha 4, 14059           | Czech Republic |
| Jens Brushoej           | Intensive Care Unit 542           | Department of Anaesthesiology                    | Hvidovre University Hospital                | 2650 Hvidovre            | Denmark        |
| Jean-Francois Timsit    | Réanimation médicale              |                                                  | Hôpital Bichat                              | 75018 Paris              | France         |
| Yves Cohen              | Réanimation polyvalente           |                                                  | Hopital Avicenne                            | Bobigny 93000            | France         |
| Christian Gouzes        | Réanimation                       |                                                  | C.H. Universitaire                          | 30029 Nines Cedex 9      | France         |
| Djillali Annane         | Réanimation Medicale              |                                                  | Hopital Raymond Poincaré                    | 92380 Garches            | France         |
| Hervé Dupont            | Unité de Réanimation Chirurgicale |                                                  | Groupe Hospitalier Bichat-Claude Bernard    | 75877 Paris Cedex 18     | France         |
| Jean-Roger Le Gall      | Réanimation Medicale              |                                                  | Hôpital St Louis                            | 75475 Paris              | France         |
| Patrick Pinta           | Réanimation Polyvalente           | Reanimation                                      | Centre hospitalier de Tarbes-Vic en Bigorre | 65013 Tarbes cedex 9     | France         |
| Samir Jamali            | Unité de Soins Intensifs          | Anesthesiology - ICU                             | Centre Hospitalier de Dourdan               | F- 91410 Dourdan         | France         |
| Michel Pascal           | Réanimation Polyvalente           |                                                  | Centre Hospitalier de Mont de Marsan        | 40000 Mont de Marsan     | France         |
| Philippe Loirat         | ICU                               | Service de Réanimation                           | Hôpital Foch                                | 92151 Suresnes Cedex     | France         |
| Patrick Charlot         | Réanimation Polyvalente           | Fédération de Médecine Interne et Réanimation    | Centre Hospitalier G. Renon                 | 7900 Niort               | France         |
| Sebastian Beague        | Service de Reanimation            |                                                  | Hôpital St Philibert, GHICL                 | Lomme                    | France         |
| Xaver Bartenschlager    | Station 14/15                     | Abteilung für Anästhesie und Intensivmedizin     | Klinikum Neukölln                           | 12313 Berlin             | Germany        |
| Frank Martin Brunkhorst |                                   | Dep. Anaesthesiology and Intensive Care Medicine | Friedrich-Schiller-University Jena          | 07740 Jena               | Germany        |
| Hans Bernd Reith        | Surgical ICU                      | Surgery                                          | University of Wuerzburg                     | D-97080 Wuerzburg        | Germany        |
| Gerd Scheiber           | ITS                               | Anaesthesiology & Intensive Care                 | Kreiskrankenhaus Ilmenau                    | D - 98693 Ilmenau        | Germany        |
| George Thomopoulos      |                                   |                                                  | Athens Laikon Hospital                      | Athens                   | Greece         |
| G. Nakos                |                                   |                                                  | Ioannina University Hospital                | Athens                   | Greece         |
| Phyllis Clouva-Molyvdas | ICU                               |                                                  | Triasion General Hospital                   | Athens                   | Greece         |
| George Giokas           | ICU                               |                                                  | Sismanoglio General Hospital                | Athens                   | Greece         |
| Nina Maguina            | ICU                               |                                                  | Konstantopouleion Hospital                  | Nea Ionia 14233          | Greece         |
| Katalin Fekete-Passa    | General ICU                       | Surgical                                         | Papageorgiou General Hospital               | Thessaloniki             | Greece         |

## Electronic Supplementary Material

|                        |                                |                                              |                                                       |                        |           |
|------------------------|--------------------------------|----------------------------------------------|-------------------------------------------------------|------------------------|-----------|
| Tsokantaridis Christos | ICU                            |                                              | General Hospital of Drama                             | 66100 Drama            | Greece    |
| Milly Bitzani          | General ICU                    | MOXA A                                       | "G. Papanicolaou" General Regional Hospital           | Exohi - Thessaloniki   | Greece    |
| Aggelos Karamanis      | General I.C.U                  |                                              | 251 Hellenic Air Forces General Hospital of Athens    | 11525 Athens           | Greece    |
| Michele Guillaume      | General ICU                    |                                              | Tripolis General Hospital                             | 22100 Tripoli          | Greece    |
| Maria Giannakou        | METHA - Intensive Care Unit    | Dep. Anaesthesia and ICU                     | AHEPA University Hospital                             | 54636 Thessaloniki     | Greece    |
| Charles Gomersall      | Adult ICU                      | Dep. Anaesthesia and Intensive Care.         | Prince of Wales Hospital                              | Shatin                 | Hong Kong |
| Cheung Po-Wa           | Mixed medical and surgical ICU | Department of Intensive Care                 | North District Hospital                               | Fanling                | Hong Kong |
| Maple Hung             | C2 Intensive Care Unit         | Adult Intensive Care Unit                    | Queen Mary Hospital                                   | Hong Kong              | Hong Kong |
| Peggy Tan              | Intensive Care Unit            | Department of Anaesthesia and Intensive Care | Tuen Mun Hospital                                     | Hong Kong SAR          | Hong Kong |
| Laszlo Szalay          | Intensive Care Unit            |                                              | City Hospital                                         | 6300 Kalocsa           | Hungary   |
| Maria Muller           | Intensive Care Unit            |                                              | Markhot Ferenc Hospital                               | 3300 Eger              | Hungary   |
| Csaba Perlaki          | Intensive Care Unit            |                                              | Kenezy Gyula Hospital                                 | 4043 Debrecen          | Hungary   |
| Balazs Kadar           | Intensive Care Unit            |                                              | BAZ County Teaching Hospital                          | 3501 Miskolc           | Hungary   |
| Agnes Mate             | Intensive Care Unit            |                                              | Szent Pantaleon Hospital                              | 2401 Dunaújváros       | Hungary   |
| Zsofia Verzar          | Intensive Care Unit            |                                              | Baranya County Hospital                               | 7621 Pécs              | Hungary   |
| Tamas Szakmany         | Intensive Care Unit            | Pecs Medical University                      | Pecs Medical University                               | 7624 Pécs              | Hungary   |
| Agnes Danczig          | Mixed Medical Surgical         | Anaesthesia and Intensive Care               | National Oncology Institute                           | 1122 Budapest          | Hungary   |
| Melinda Forro          | Intensive Care Unit            | Dept. of Transplant Surgery                  | Semmelweis University                                 | 1085 Budapest          | Hungary   |
| Noemi Foldes           | Intensive Care Unit            | 1st Dept. of Surgery                         | Semmelweis University                                 | 1082 Budapest          | Hungary   |
| Csaba Perlaki          | KAITO                          | Medical                                      | Kenézy Gyula County Hospital                          | Bartok B. I. 2-26      | Hungary   |
| J.V.Divatia            | Nargis Dutt Critical Care Unit |                                              | Tata Memorial Hospital                                | 400012 Mumbai          | India     |
| Vineet Nayyar          | Multidisciplinary ICU          | Critical Care & Emergency Services           | Manipal Hospital                                      | Bangalore 560017       | India     |
| Farokh E. Udwadia      | Medical and Surgical ICU       |                                              | Breach Candy Hospital                                 | 400026 Mumbai          | India     |
| Farhad N.Kapadia       | 3rd Floor ICU                  |                                              | Hinduja National Hospital and medical Research Centre | 400016 Mumbai (Bombay) | India     |
| Vijaylakshmi Kamat     | Multidisciplinary ICU          |                                              | Sri Ramachandra Medical College of Research Institute | 600116 Chennai         | India     |
| Gopal Taori            | Medical/Surgical               | Critical Care Medicine                       | Jaslok Hospital and Re-                               | Mumbai 400026          | India     |

## Electronic Supplementary Material

|                        |                                              |                                                     |                                                                     |                          |         |
|------------------------|----------------------------------------------|-----------------------------------------------------|---------------------------------------------------------------------|--------------------------|---------|
| Maria Donnelly         | ICU                                          | Intensive Care                                      | search Centre<br>Adelaide Meath and National<br>Children's Hospital | Dublin                   | Ireland |
| Charles Sprung         | ICU                                          |                                                     | Hadassah Hebrew University                                          | 91120 Jerusalem          | Israel  |
| Eran Segal             | General Intensive Care<br>Unit               | Anesthesiology and Intensive<br>Care                | Sheba Medical Center                                                | 52621 Tel Hashomer       | Israel  |
| Lucia Casagrande       | Rianimazione                                 | Emergency Dep.                                      | Ospedale S. Maria dei Battuti<br>Cà Foncello                        | 31100 Treviso            | Italy   |
| Rosa Salcuni           | Rianimazione                                 | Emergency Dep.                                      | Ospedale Civile di Ivrea                                            | 10015 Ivrea (TO)         | Italy   |
| Vittorio Pavoni        | Rianimazione                                 |                                                     | Azienda Ospedaliera di Pa-<br>dova                                  | 35100 Padova             | Italy   |
| Livio Carnevale        | Rianimazione                                 | Servicio di Anestesia e Riani-<br>mazione 2         | Policlinico S. Matteo                                               | 27100 Pavia              | Italy   |
| Carlo Mosca            | Terapia Intensiva 4                          | Chirurgia                                           | Azienda Ospedaliera Pisana                                          | 56100 Pisa               | Italy   |
| Iole Brunetti          | Rianimazione Monobloco                       | Anesthesia and Intensive Care                       | Azienda S. Martino                                                  | 16132 Genova             | Italy   |
| Sara Carrer            | U.O. di Anestesia e Riani-<br>mazione        | Emergency Dep.                                      | Ospedale San Luca                                                   | 45027 Trecenta (RO)      | Italy   |
| Anna Randino           | Terapia Intensiva                            | Dep. Surgery, Anaesthesiology<br>and Intensive Care | Azienda Ospedaliera di Trie-<br>ste-Ospedale Cattinara              | 34139 Trieste            | Italy   |
| Alberto Merlini        | Rianimazione A                               |                                                     | Azienda Ospedaliera Verona-<br>Ospedale Civil Maggiore              | 37126 Verona             | Italy   |
| Giovanni Negri         | Rianimazione 1                               | Chirurgia                                           | IRCCS Policlinico S. Mateo                                          | 27100 Pavia              | Italy   |
| Alberto Sicignano      | Servizio Anestesia e Ria-<br>nimazione       | Rianimazione E. Vecla                               | Ospedale Maggiore Policlini-<br>co IRCCS                            | 20122 Milano             | Italy   |
| Daniela Giudici        | Rianimazione e Terapia In-<br>tensiva        | Anestesia e Rianimazione                            | H. San Rafael IRCCS                                                 | 20132 Milano             | Italy   |
| Mario Tavola           | Rianimazione                                 | 1 <sup>a</sup> U. D. Anestesia e Rianima-<br>zione  | Ospedale S. Manzoni                                                 | 23900 Lecco              | Italy   |
| Sandra Alleva          | General Intensive Care                       | Emergency and Critical Care                         | Ospedale Maggiore Della Ca-<br>rita                                 | 28100 Novara             | Italy   |
| Monica Vaj             | Rianimazione Centrale                        | Anestesia-Rianimazione                              | San Giovanni Battista-<br>Molinette                                 | 10126 Torino             | Italy   |
| Alessandro Mastroianni | UTI                                          | Anestesia Rianimazione                              | Ospedale Maggiore                                                   | 10023 Chieri (TO)        | Italy   |
| Ornella Piazza         | Istituto de Anestesiologia e<br>Rianimazione | Science Chirurgiche-<br>Anesthesiologichs           | Azienda Universitaria Policli-<br>nico Federico II                  | 80131 Napoli             | Italy   |
| Vanna Valpondi         | Rianimazione                                 | Dep. Surgery, Anesthesiology<br>and Radiology       | Azienda Ospedale-Università<br>S. Anna                              | 44100 Ferrara            | Italy   |
| Abele Donati           | Rianimazione Clinica                         | Istituto Emergenze Medico Chi-<br>rurgiche          | Ospedale Regionale Umberto I                                        | 60020 Torrette di Ancona | Italy   |
| Quirino Piacevoli      | Cardiac surgery                              | Anesthesia and Intensive Care                       | A. C. O. San Filippo Neri                                           | 00135 Roma               | Italy   |

## Electronic Supplementary Material

|                      |                                             |                                                  |                                                    |                                   |       |
|----------------------|---------------------------------------------|--------------------------------------------------|----------------------------------------------------|-----------------------------------|-------|
| Domenico Milella     | Rianimazione II settore                     | Istituto di Anestesia e Rianimazione             | Azienda Ospedale-Policlinico di Bari               | 70124 Bari                        | Italy |
| Mauricia Marchi      | Servizio Anestesia e Rianimazione           | Emergency Dep.                                   | Arcispedale S. Anna                                | 44100 Ferrara                     | Italy |
| Roberto Rosi         | General                                     | Ist ICU                                          | Policlinico Le Scotte                              | 53100 Siena                       | Italy |
| Maria Lucia Bindi    | Post. Surgical and Post-Transplantation ICU | I. V. O. Anestesia e Rianimazione                | Azienda Ospedale Pisana Pisa                       | 56100 Pisa                        | Italy |
| Ettore Panascia      | Rianimazione Ospedale Vittorio Emanuele     | Il serv. Anestesia e Rianimazione                | Ospedale Vittorio Emanuele                         | 95124 Catania                     | Italy |
| Marianna Messina     | Rianimazione                                | Anestesia e Rianimazione                         | Ospedale Civile S. Giovanni Di Dio                 | 07026 Olbia (SS)                  | Italy |
| Maurizio Postiglione | Rianimazione e Terapia Intensiva            | ASL Napoli 1                                     | Ospedale S. Maria di Loreto                        | 80100 Napoli                      | Italy |
| Federico Bilotta     | Neuroanesthesia                             | Anesthesia e Intensiva Care                      | Policlinico Umberto I, Università Roma La Sapienza | 00100 Roma                        | Italy |
| Angelo Pezzi         | Terapia Intensiva                           |                                                  | Ospedale San Paolo                                 | 20142 Milano                      | Italy |
| Gilberto Fiore       | UONA Rianimazione e Terapia Intensiva       | Dep. Anestesia, Rianimazione e Terapia Antalgica | Ospedale Santa Croce                               | 100024 Moncalieri, Torino         | Italy |
| Monica Meucci        | Centro Rianimazione                         | U. B. Anestesia, Rianimazione E. T. A.           | Hospedale Regional Della Valle D'Aosta             | 11100 Aosta                       | Italy |
| Renata Cavallo       | Rianimazione Universitaria                  | Emergenza DEA                                    | Ospedale Maggiore S. Giovanni Battista             | Torino                            | Italy |
| Marco Librenti       | Rianimazione                                |                                                  | Ospedale Nuovo San Giovanni Di Dio                 | 50143 Firenze                     | Italy |
| Giancarlo Negro      | Centro di Rianimazione e T. I.              | DEU                                              | Ospedale F. Ferraro                                | 73042 Casarano (Lecce)            | Italy |
| Cinzia Cibir         | General ICU                                 | Emergency Care Dep.                              | S. Carlo Borromeo                                  | 20152 Milano                      | Italy |
| Emiliano Cingolani   | Centro di rianimazione "marchiafava"        | Servizio di anestesia e rianimazione generale    | Azienda ospedaliera san camillo-forlanini          | 00149 Roma                        | Italy |
| Susanna Zambuto      | 2° rianimazione                             | 2° servizio anestesia e rianimazione             | Arnas civico, dicristina, ascoli                   | 90100 Palermo                     | Italy |
| Marco Pulici         | Terapia intensiva generale                  | Emergency & ICU                                  | Ospedale niguarda cà granda                        | 20162 Milan                       | Italy |
| Giuseppe Chini       | Reparto di Rianimazione                     | U.O. Anestesia e Rianimazione                    | Nuovo Ospedale del Mugello                         | 50032 Borgo San Lorenzo (Firenze) | Italy |
| Silvio Pennacchioni  | Rianimazione ospedaliera                    | Emergenza                                        | Umberto I°-Torrette                                | 60020 Ancona                      | Italy |
| Leandro Barontini    | General ICU                                 | Anesthesia and intensive care                    | Ospedale Pistoia                                   | 51100 Pistoia                     | Italy |
| Stefano Falini       | Rianimazione Polivalente "Misericordia"     | Emergenza accettazione                           | Misericordia A.S.L. 9                              | 58100 Grosseto                    | Italy |
| Paolo Gazzani        | Servizio Anestesia e Rianimazione           | Emergenza - Urgenza                              | Ospedale Mater Salutis, ASL 21                     | 37045 Legnago - VR                | Italy |

## Electronic Supplementary Material

|                            |                                       |                                                    |                                                                          |                         |            |
|----------------------------|---------------------------------------|----------------------------------------------------|--------------------------------------------------------------------------|-------------------------|------------|
| Felice Centuri             | Rianimazione Polivalente              | Area Critica                                       | Istituto "Regina Elena" per lo studio e la cura dei tumori               | 00144 Rome              | Italy      |
| Stefano Maitan             |                                       | Anaesthesia and Intensive Care                     | Per Gli Infermi Faenza AUSL Ravenna                                      | 48018 Faenza (Ravenna)  | Italy      |
| Danilo Carloni             | ICU                                   | Dept. of Anesthesia                                | Ospedale "S.Giovanni Battista"                                           | 06034 Foligno (PG)      | Italy      |
| Attilio De Gasperis        | A. Mosca                              | Anestesia e Rianimazione                           | C.T.O. ASL Rm C                                                          | 00144 Roma              | Italy      |
| Daniela Silengo            | General ICU                           | Emergency Dep.                                     | Torino Nord Emergenza Ospedale San Giovanni Bosco                        | Torino                  | Italy      |
| Maurizio Ostaldo           | Rianimazione H. Desio                 | Anestesia-Rianimazione                             | H.Civile di Vimercate - Presidio di Desio                                | Desio, MI               | Italy      |
| Frank Jacob                | ICU                                   | Anestesia e Rianimazione                           | U.L.S.S N° 14 Ospedale di Chioggia                                       | 30015 Chioggia (VE)     | Italy      |
| Biagio Allaria             | Unità Operativa di Terapia Intensiva  | Critical Patient                                   | Istituto Nazionale per lo Studio e la Cura dei Tumori (Cancer Institute) | 20133 Milan             | Italy      |
| Igino Tanga                | Terapia Intensiva Chirurgica          | Emergency Department                               | Ospedale S. Giovanni                                                     | 00184 Rome              | Italy      |
| Monica Rocco               | ICU                                   | Dep. of Anesthesiology and Intensive Care          | Policlinico Umberto I°, University of Rome "La Sapienza"                 | 00161 Rome              | Italy      |
| Lorenzo Odetto             | Terapia Intensiva                     | SCDO Anestesia e Rianimazione                      | Ospedale San Luigi                                                       | 10143 Orbassano (TO)    | Italy      |
| Elisabetta Spadini         | Terapia Intensiva Posoperatoria       | Unita Operativa Anestesia, Rianimazione, T. Antalg | Azienda Ospedaliera Universitaria di Parma                               | 43100 Parma             | Italy      |
| Claudio Sandroni           | Centro di Rianimazione                | Anaesthesiology and Intensive Care                 | Policlinico Universitario Agostino Gemelli                               | 00168 Roma              | Italy      |
| Lucia Cubattoli            | General and Neurosurgical ICU         | Anaesthesia and Intensive Care                     | S. Egrardo Nuovo Hospital                                                | 20052 Monza             | Italy      |
| Pio Zannetti               | ICU                                   |                                                    | Ospedale San Paolo                                                       | Naples                  | Italy      |
| Quirino Piacevoli          | Neurosurgery                          | Anesthesia and Intensive Care                      | A. C. O. San Filippo Neri                                                | 00135 Roma              | Italy      |
| Quirino Piacevoli          | Vascular surgery                      | Anesthesia and Intensive Care                      | A. C. O. San Filippo Neri                                                | 00135 Roma              | Italy      |
| Quirino Piacevoli          | Thoracic surgery                      | Anesthesia and Intensive Care                      | A. C. O. San Filippo Neri                                                | 00135 Roma              | Italy      |
| Monika Savicka             | Burn Center Anesthesiology, Intensive | Latvia State Burn Center                           | Hospital Bikernieki                                                      | Riga LV-1006            | Latvia     |
| Bernhard Stein             | Service de Reanimation                | Service de Anesthésie-Réanimation                  | Hopital de la Ville d'Esch                                               | L-4240 Esch-sur-Acostte | Luxembourg |
| Margaret Hemmer            | ICU                                   | Department of Anaesthesiology and Intensive Care   | Centre Hospitalaire de Luxembourg                                        | L-1210 Luxembourg       | Luxembourg |
| Guillermo Dominguez-Cherit | Critical Care Unit                    | Critical Care                                      | Instituto Nacional Ciencias Médicas y Nutrición Salvador                 | 14000 México, D.F.      | Mexico     |

## Electronic Supplementary Material

|                              |                                                 |                                             |                                                        |                         |          |
|------------------------------|-------------------------------------------------|---------------------------------------------|--------------------------------------------------------|-------------------------|----------|
| Ulises W. Cerón Díaz         | U. T. Intensiva "Dr. Alberto Villazón S."       |                                             | Zubiran<br>Hospital Español de México                  | México D.F. 11560       | Mexico   |
| Jorge Enrique Pérez Figueroa | ICU                                             | Medicina Crítica                            | Hospital Mocel                                         | C.P. 11850 Mexico       | Mexico   |
| Abel Maldonado Ortiz         |                                                 | Pulmonary and Critical Care Dept            | Hospital General Dr. Miguel Silva                      | Michoacan               | Mexico   |
| Alfonso Mendez               | ICU                                             |                                             | Hosp. Regional 1, Instituto Mexicano del Seguro Social | Morelia, Michoacán      | Mexico   |
| Alfredo Mercado Aguirre      | Unidad de Terapia Intensiva                     |                                             | Hospital General Regional No 72 IMSS                   | Talnepantla             | Mexico   |
| Mauricio Jose Borbolla Paya  | UCI                                             | Medicina Critica                            | Hospital Santelena                                     | 06700 Mexico City       | Mexico   |
| Posadas                      | ICU                                             |                                             | Hospital de la Luz                                     | Morelia, Michoacán      | Mexico   |
| Magnar Osnes                 | General ICU                                     | Dep. of Anaesthesiology                     | University Hospital of Tromso                          | N-9038 Tromso           | Norway   |
| Ole Christian Rolfseng       | General ICU                                     | Dep. of anaesthesia and intensive care      | Regional University Hospital Trondheim                 | N-7006 Trondheim        | Norway   |
| Hans Flaatten                | General ICU                                     | Dep. Anesthesia and Intensive Care          | Haukeland University Hospital                          | N-5021 Bergen           | Norway   |
| Nils Smith-Erichsen          | General DCU                                     | Anaesthesia                                 | Akershus University Hospital                           | N-1474 Nordbyhagen      | Norway   |
| Jacek Borkowski              | ICU                                             | Anaesthesiology and Intensive Care          | Teaching Hospital of Medical Academy in Bialystok      | 15-276 Bialystok        | Poland   |
| Piotr Harbut                 | Clinic of Anaesthesiology and Intensive Therapy | Department of Anaesthesiology and Int. Care | Wroclaw University of Medicine                         | 51-638 Wroclaw          | Poland   |
| Miguel Castelo Branco        | UCI Serviço Medicina Intensiva                  |                                             | Hospital Covilhã, Centro Hospitalar Cova da Beira      | Covilhã                 | Portugal |
| Celeste Dias                 | UC Pós-Operatórios de Neurocirurgia             | Anestesiologia e Cuidados Intensivos        | Hospital S. João                                       | 4202-451 Porto          | Portugal |
| Eduardo Silva                | UCIP                                            |                                             | Hospital do Desterro                                   | 1100 Lisboa             | Portugal |
| Isabel Maia                  | UCI Polivalente da Urgência                     | Anestesiologia e Cuidados Intensivos        | Hospital S. João                                       | 4202-451 Porto          | Portugal |
| Maria Teresa Oliveira        | U. Reanimação Respiratória                      | Anestesiologia e Cuidados Intensivos        | Hospital S. João                                       | 4202-451 Porto          | Portugal |
| Fernando Pinto Pádua         | UCI Dr. Emílio Moreira                          |                                             | Hospital Dr. José Maria Grande                         | 7300-853 Portalegre     | Portugal |
| João Frederico               | UCIP                                            |                                             | Hospital Amato Lusitano                                | 6000-085 Castelo Branco | Portugal |
| Eduardo Almeida              | UCI                                             | UCI                                         | Hospital Garcia de Orta                                | 2800 Almada             | Portugal |
| Maria Dores Marques          | UCIMG de Medicina e Gastroenterologia           | Serviço Universitário Medicina III          | Hospital Pulido Valente                                | 1769-001 Lisboa         | Portugal |
| Luís Telo                    | UCIPneumológicos                                | Pneumologia                                 | Hospital Pulido Valente                                | 1769-001 Lisboa         | Portugal |

Electronic Supplementary Material

|                          |                                        |                                                 |                                         |                           |          |
|--------------------------|----------------------------------------|-------------------------------------------------|-----------------------------------------|---------------------------|----------|
| Filomena Faria           | UCI-A                                  | Anestesia                                       | Instituto Português Oncologia - Norte   | 4200-072 Porto            | Portugal |
| Piedade Amaro            | UCIP                                   | Anestesia, Emergência e Cuidados Intensivos     | São Sebastião                           | 4520 Santa Maria da Feira | Portugal |
| Custódio Fidalgo         | Polivalente                            | UCI                                             | Hospital de Santarém                    | Santarém                  | Portugal |
| Dionísio Faria Maia      | Polivalente                            |                                                 | Hospital Divino Espírito Santo          | Ponta Delgada, Açores     | Portugal |
| João Pedro Falcão        | Serviço de Medicina Intensiva          |                                                 | Hospital Universidade de Coimbra        | 3000 Coimbra              | Portugal |
| Francisca Delerue        | Unidade Médica Diferenciada            | Medicine                                        | Hospital Garcia de Orta                 | 2800-525 Almada           | Portugal |
| Maria José Pereira Arede | UCIP                                   |                                                 | Hospital S. Teotónio                    | 3504-509 Viseu            | Portugal |
| Arlindo Sousa            | ICUP                                   |                                                 | Hospital Distrital de Faro              | 8000-386 Faro             | Portugal |
| António Pais Martins     | Unidade Cuidados Intensivos Cirurgicos | Anestesiologia                                  | Hospital São Francisco Xavier           | 1400-157 Lisboa           | Portugal |
| Guilherme Gomes          | UCIP                                   |                                                 | Hospital de S. Marcos                   | 4701-965 Braga            | Portugal |
| Rui Moreno               | UCIP                                   |                                                 | Hospital de Santo António dos Capuchos  | 1100 Lisboa               | Portugal |
| José Sousa e Costa       | UCIP                                   | Dep. Medicina                                   | Hospital do SAMS                        | 1849-017 Lisboa           | Portugal |
| Carlos França            | UCIP                                   |                                                 | Hospital de Santa Maria                 | 1649-035 Lisboa           | Portugal |
| Maria Helena Vilela      | UCI                                    |                                                 | Hospital Nossa Senhora do Rosário       | 2830 Barreiro             | Portugal |
| Gabriela Brum            | UCIR                                   |                                                 | Hospital de Santa Maria                 | 1649-035 Lisboa           | Portugal |
| Isabel Serra             | UCIP                                   | Dep. Anestesia, Reanimação e Terapêutica da Dor | Hospital Fernando Fonseca               | 2700 Amadora              | Portugal |
| Carlos Glória            | UCIP                                   |                                                 | Hospital do Barlavento Algarvio         | 8500 Portimão             | Portugal |
| Elda Camacho             | UCI                                    |                                                 | Hospital São Bernardo                   | 2900 Setúbal              | Portugal |
| Carlos Azevedo           | Serviço de Cuidados Intensivos         |                                                 | Centro Hospitalar de Coimbra            | 3040 Coimbra              | Portugal |
| Mário Castro             | UCI                                    |                                                 | Instituto Português de Oncologia        | 1099-023 Lisboa           | Portugal |
| Irene Aragão             | UCIP                                   | Dep. Urgência                                   | Hospital Geral Santo António            | 4091-001 Porto            | Portugal |
| Edward Richard Maul      | Serviço de Medicina Intensiva          |                                                 | Centro Hospitalar do Funchal            | 9000-514 Funchal, Madeira | Portugal |
| José Vaz                 | UCI                                    |                                                 | Hospital José Joaquim Fernandes         | 7800 Beja                 | Portugal |
| Maria João Ferreira      | Unidade de Urgência Médica             |                                                 | Hospital de S. José                     | 1150-199 Lisboa           | Portugal |
| João Leal                | UCIP                                   |                                                 | Hospital Distrital de Angra do Heroísmo | 9700 Angra do Heroísmo    | Portugal |



## Electronic Supplementary Material

|                                 |                                                 |                                                    |                                                              |                               |                    |
|---------------------------------|-------------------------------------------------|----------------------------------------------------|--------------------------------------------------------------|-------------------------------|--------------------|
| Mário Rui Silva                 | Unidade de Cuidados Intensivos - Pavilhão A     |                                                    | Heroísmo<br>Hospital Curry Cabral                            | mo, Açores<br>1069-166 Lisboa | Portugal           |
| Ana Isabel Paixão               | UCIP                                            | Dep. Anestesia                                     | C. H. Vila Nova de Gaia                                      | Vila Nova Gaia                | Portugal           |
| Bernardino Páscoa               | UCIP                                            |                                                    | Hospital do Espírito Santo                                   | Évora                         | Portugal           |
| Maria Lurdes Santos             | UCI Doenças Infecciosas                         | Doenças Infecciosas                                | Hospital S. João                                             | 4202-451 Porto                | Portugal           |
| Paulo Maia                      | Serviço de Cuidados Intensivos                  |                                                    | Hospital Geral de Santo António                              | 4099-001 Porto                | Portugal           |
| Igor Borisovitch Zabolot-skikh  | Resuscitation and Intensive Care Unit           | Dep. Resuscit., Intens. Care and Extracorp. Haemoc | Russian Center of Functional Surgical Gastroenterology       | Krasnodar, 350901             | Russian Federation |
| Stefan Trenkler                 | ICU                                             | Dep. Anaesthesiology and Intensive Medicine        | Reimann Hospital                                             | SK-081 81 Presov              | Slovakia           |
| Lucka Kosec                     | Surgical                                        | Anesthesiology and Intensive Care                  | General Hospital                                             | 8000 Novo Mesto               | Slovenia           |
| Franc Sifrer                    | Medical intensive care unit                     | Respiratory Dep.                                   | University clinic of respiratory diseases and allergy Golnik | 4204 Golnik                   | Slovenia           |
| Viktor Svigelj                  | Neurological ICU                                | Dept. of Neurology                                 | University Medical Centre Ljubljana                          | SI-1525 Ljubljana             | Slovenia           |
| Branka Ozek                     | ICU                                             | Internal medicine                                  | General Hospital Novo Mesto                                  | 8 000 Novo Mesto              | Slovenia           |
| Francisco José Fernández Dorado | UCI                                             | Critical Care                                      | Clínica Delfos                                               | 08023 Barcelona               | Spain              |
| Miguel Angel Suarez Pinnilla    | Servicio Medicina Intensiva Y Unidade Coronaria |                                                    | Clínic Universitario Lozano Blesa                            | 50009 Zaragoza                | Spain              |
| Felix Lacoma                    | UCI                                             | UCI                                                | Fundación Hospital Alcorcón                                  | 28922 Alcorcon, Madrid        | Spain              |
| Juan Carlos Montejó González    | UCI Polivalente                                 | Medicina Intensiva                                 | 12 de Octubre                                                | 28041 Madrid                  | Spain              |
| Jesús Rebollo-Ferreiro          | UCI                                             |                                                    | Hospital Severo Ochoa                                        | 28911 Leganés                 | Spain              |
| Ricardo Abizanda i Campos       | ICU                                             |                                                    | Hospital General de Castelló                                 | 12004 Castellón               | Spain              |
| Enrique Cereijo                 | Unidad de Cuidados Intensivos                   | Servicio de Medicina Intensiva                     | Hospital Universitario de La Princesa                        | 28006 Madrid                  | Spain              |
| Jordi Rello                     | UCI                                             | Critical Care                                      | Universitari Joan III Tarragona                              | 43007 Tarragona               | Spain              |
| José Ignacio Corchero Martín    | UCI                                             |                                                    | Hospital Real Provincial Zaragoza N S de la Gracia           | 50004 Zaragoza                | Spain              |
| Adrián Cordón López             | Servicio de Medicina Intensiva                  | Servicio de Cuidados Críticos y Urgencias          | Hospital General Universitario Carlos Haya                   | 29010 Malaga                  | Spain              |
| Fermin Labaien Beraza           | General                                         | Medicina Intensiva                                 | Hospital Santiago Apostolo                                   | 01004 Vitoria - Gasteiz       | Spain              |
| María Alvarez García-Pumarino   | ICU                                             | Medicina Intensiva                                 | Hospital de Terrassa                                         | 08227 Terrassa (Barcelona)    | Spain              |

Electronic Supplementary Material

|                             |                                  |                                           |                                                    |                                 |             |
|-----------------------------|----------------------------------|-------------------------------------------|----------------------------------------------------|---------------------------------|-------------|
| Antonio Artigas             | Servicio Medicina Intensiva      | Critical Care Center                      | Sabadell Hospital                                  | 08208 Sabadell                  | Spain       |
| Fernando Frutos-Vivar       | UCI                              | Medicina Intensiva                        | Hospital Universitario de Getafe                   | Getafe                          | Spain       |
| Antoni Alvarez Villuendas   | UCI polivalent                   | Cures Intensives                          | Hospital Universitari Dr. Josep Trueta             | 17007 Girona                    | Spain       |
| Manuel Guirado Alaiz        | Polivalent ICU                   | Malalt Critic                             | Centre Hospitalare Unitat Coronaria Manresa        | 08240 Manresa                   | Spain       |
| Teresa Honrubia Fernández   | Unidad de Cuidados Intensivos    |                                           | Hospital de Móstoles                               | 28935 Móstoles (Madrid)         | Spain       |
| Pablo Monedero Rodríguez    | Clínica Universitaria de Navarra | Anestesiología y Reanimación              | Clínica Universitaria de Navarra                   | Pamplona 31008                  | Spain       |
| Jose Antonio Gonzalo Guerra | ICU                              | Instituto Nacional de Silicosis           | Hospital Central de Asturias                       | 33006 Oviedo (Asturias)         | Spain       |
| Jose Ramos Castro           | UCI                              | Medicina Intensiva                        | Hospital Virgen del Camiño                         | 31008 Pamplona                  | Spain       |
| Julian Gil Alaiz            | Unidad de Medicina Intensiva     | Servicio de Cuidados Criticos y Urgencias | Hosp. Universitario Puerto Real                    | Cadiz                           | Spain       |
| Nicolas Serrano Hernandez   | General ICU                      | Servicio de Medicina Intensiva            | Hosp. Universitario de Canarias                    | 38320 La Laguna, Tenerife       | Spain       |
| Jose A. Cambroneru Galache  | Unidad de Medicina Intensiva     | Medicina Intensiva                        | Hospital Universitario Principe de Asturias        | Alcalá de Henares, Madrid 28805 | Spain       |
| Pedro Ibáñez Lucia          | Unidad de Medicina Intensiva     | Criticos                                  | Hospital Fundacion Son Llatzer                     | 07198 Palma de Mallorca         | Spain       |
| Paz Merico de Cos           | Servicio de Medicina Intensiva   | Servicio de Medicina Intensiva            | Can Misses                                         | Ibiza 07800 Baleares            | Spain       |
| Javier Trujillano Cabello   | ICU                              | Medicina Intensiva                        | Hospital Universitario Arnau de Vilanova de Lleida | 25006 Lleida                    | Spain       |
| Manuel Garcia Delgado       | Medical and Surgical ICU         | Servicio de Cuidados Criticos y Urgencias | Hospital Universitario Virgen de las Nieves        | 18014 Granada                   | Spain       |
| Martín Parejo Montell       | UCI                              |                                           | Hospital de la Ribera                              | 46600 Alzira (Valencia)         | Spain       |
| Rosa Corcuera               | Medicina Intensiva               | Medicina Intensiva                        | Hospital Sagrat Cor                                | 08029 Barcelona                 | Spain       |
| Keld Brodersen              | ICU                              | IVA                                       | Centralsjukhuset, Kristianstad                     | S 29185 Kristianstad            | Sweden      |
| Carl-Johan Wickerts         | ICU                              |                                           | Danderyd Hospital                                  | SE-182 88 Stockholm             | Sweden      |
| Silke Ludwig                | Surgical Intensive Care          | Surgical Dept.                            | University Hospital Zurich                         | CH 8091 Zürich                  | Switzerland |
| Hans Ulrich Rothen          | Abteilung für Intensivbehandlung |                                           | Inselspital                                        | CH 3010 Bern                    | Switzerland |
| Adrian Frutiger             |                                  |                                           | Intensivstation                                    | CH 7000 Chur                    | Switzerland |
| G. Niedermaier              |                                  | Med. Klinik                               | Interdisz. IPS                                     | CH 7270 Davos Platz             | Switzerland |
| Hervé O. Zender             | Unité de Soins Intensifs         | Département de Médecine                   | Hôpital de la Ville                                | 2300 La Chaux-de-Fonds          | Switzerland |
| R. Malacrida                |                                  |                                           | Cure intense interdisciplinari                     | CH 6900 Lugano                  | Switzerland |

## Electronic Supplementary Material

|                      |                                   |                                 |                                                  |                             |                 |
|----------------------|-----------------------------------|---------------------------------|--------------------------------------------------|-----------------------------|-----------------|
| Vladimir Kaplan      | Medical ICU                       | Department of Internal Medicine | Ospedale Civico<br>University Hospital of Zurich | CH 8091 Zürich              | Switzerland     |
| Silvia Cottini       | SIC                               |                                 | HUG                                              | CH 1211 Geneva 14           | Switzerland     |
| Guido Domenighetti   | Multidisciplinary ICU             |                                 | Regionale Hospital "La Carita"                   | CH 6600 Locarno             | Switzerland     |
| Katharina Marquardt  | Interdisziplinäre Intensivstation | Anaesthesie                     | Kreisspital Maennedorf                           | 8708 Maennedorf             | Switzerland     |
| Philipp Zinsser      | medicine and surgery              | Anästhesie                      | St. Claraspital Basel                            | CH-4058 Basel               | Switzerland     |
| R. J. Bosman         | F1 afdeling Intensive Care        |                                 | Onze Lieve Vrouwe Gasthuis                       | 1091 HA Amsterdam           | The Netherlands |
| J. C. A. Joore       |                                   |                                 | Universitair Medisch Centrum Utrecht             | 3584 CX Utrecht             | The Netherlands |
| Wilma in't Veld      | Surgical Intensive Care           | 10th Floor, Surgery             | Erasmus MC University Hospital Rotterdam         | 3015 GD Rotterdam           | The Netherlands |
| Arthur RH van Zanten | Unit I                            | Department of Intensive Care    | Gelderse Vallei Hospital                         | 6716 RP EDE                 | The Netherlands |
| Figen Esen           | Multidisciplinary ICU             | Dept. Of Anesthesiology         | Istanbul Faculty of Medicine                     | 34390 CAPA-Istanbul         | Turkey          |
| Gulsen Korfali       | Neurosurgical ICU                 | Dept. Of Anesthesiology         | University of Uludag                             | Bursa                       | Turkey          |
| Merih Gokben         | Surgical ICU                      | Dept. Of Anesthesiology         | GATA Haydarpasa Training Hospital                | Istanbul                    | Turkey          |
| Murat Gunduz         | Multidisciplinary ICU             | Dept. Of Anesthesiology         | Cukurova University Hospital                     | 01330 Balcali Adana         | Turkey          |
| Levent Dosemeci      | General ICU                       | Dept. Of Anesthesiology         | Akdeniz University Hospital                      | 07070 Antalya               | Turkey          |
| Ismail Cinel         | Multidisciplinary ICU             | Anesthesiology                  | Mersin University Hospital                       | Mersin                      | Turkey          |
| Ali Resat Moral      | Multidisciplinary ICU             | Anesthesiology                  | Ege University Hospital                          | Izmir                       | Turkey          |
| Melek Sakarya        | Anesthesiology                    | Anesthesiology and Reanimation  | Celal Bayar University Hospital                  | 45010 Manisa                | Turkey          |
| Birgul Yelken        | Anesthesiology                    | Dep. Anesthesiology             | Osmangazi University Medical Faculty             | Eskisehir                   | Turkey          |
| Oktay Demirkiran     | Multidisciplinary ICU             | Dept. Of Anesthesiology         | Cerrahpasa Faculty of Medicine                   | 34303 Istanbul              | Turkey          |
| Mehmet Kizilkaya     | General ICU                       | Anaesthesiology and Reanimation | Ataturk University Medical faculty               | Erzurum                     | Turkey          |
| Nahit Cakar          | Emergency surgical ICU            | Surgery                         | Istanbul Medical Faculty                         | 34390 Istanbul              | Turkey          |
| Tulin Erden          | Neurosurgical ICU                 | Neurosurgery                    | Istanbul Medical Faculty                         | 34390 Istanbul              | Turkey          |
| Aygen Turkmen        | Reanimation                       | Anaesthesiology and Reanimation | SSK Okmeydani Training Hospital                  | Okmeydani-SISU              | Turkey          |
| Mark Palazzo         | Critical Care Services            | Hammersmith Hospitals NHS Trust | Charing Cross Hospital                           | London W6 8RF               | United Kingdom  |
| Brendan Pearmain     | Intensive Care Unit               | Anaesthesia                     | James Paget Hospital                             | Gorleston, Norfolk NR31 6LA | United Kingdom  |
| Nick JD Macartney    | ICU                               |                                 | Chase Farm Hospital                              | EN2 8JL Middlesex           | United Kingdom  |

Electronic Supplementary Material

|                          |                     |                                                  |                                                        |                                       |                |
|--------------------------|---------------------|--------------------------------------------------|--------------------------------------------------------|---------------------------------------|----------------|
| C Barrera Groba          | Intensive Care Unit | Critical Care                                    | University Hospital Lewisham                           | London SE13 6LH                       | United Kingdom |
| Kevin Gunning            | John Farman ICU     | Perioperative Cares Services                     | Addenbrookes Hopsital                                  | Cambridge CB2 2QQ                     | United Kingdom |
| Elizabeth Hayward        | ICU                 | Critical Care Complex                            | Norfolk and Norwich Univer-<br>sity Hospital NHS Trust | Norfolk, NR4 7UZ                      | United Kingdom |
| A Pickworth              | ICU                 |                                                  | Princess Margaret Hospital                             | Swindon,SN1 4JU                       | United Kingdom |
| Sister Sheila M Reynolds | Critical Care Unit  |                                                  | Royal Hallamshire Hospital                             | Sheffield S10 2JF                     | United Kingdom |
| William E Hurford        | Critical Care       | Department of Anesthesia and<br>Critical Care    | Massachusetts General Hos-<br>pital                    | Boston, Massachusetts<br>02114        | United States  |
| Eileen Askew             | MICU/SICU           | Critical Care Division                           | Baystate Medical Center                                | Springfield, Massachu-<br>setts 01199 | United States  |
| Predrag S. Romic         | Surgical ICU        | Clinic of Anesthesiology and In-<br>tensive Care | Military Medical Academy<br>Belgrad                    | 11002 Belgrade                        | Yugoslavia     |
